# Supplementary material for: Widening the lens of population-based health research to climate change impacts and adaptation: the climate change and health evaluation and response system (CHEERS)
Source: Front Public Health. 2023 May 25;11:1153559. doi: 10.3389/fpubh.2023.1153559 (PMC10248881; doi:10.3389/fpubh.2023.1153559)
Supplement: Supplementary file 2 [file Data_Sheet_2.pdf]

# CHES-RS

---

## SURVEY IDENTIFICATION INFORMATION QUESTIONNAIRE DESCRIPTION

### COVER

No sub-sections, No rosters, Questions: 4.

### INTRODUCTION

No sub-sections, No rosters, Questions: 23, Static texts: 5, Variables: 13.

### IDENTIFICATION MÉNAGE

Sub-sections: 3, Rosters: 1, Questions: 47, Static texts: 1, Variables: 5.

### MEMBRES DU MÉNAGE

Sub-sections: 5, Rosters: 4, Questions: 99, Static texts: 17, Variables: 14.

### NUTRITION

No sub-sections, Rosters: 2, Questions: 61, Static texts: 3, Variables: 1.

### INSÉCURITÉ ALIMENTAIRE

No sub-sections, Rosters: 1, Questions: 18.

### ANTHROPOMÉTRIE

Sub-sections: 1, Rosters: 1, Questions: 22, Static texts: 4, Variables: 1.

### REVENUS ET DÉPENSES

No sub-sections, Rosters: 6, Questions: 20, Static texts: 5.

### MORBIDITÉ

Sub-sections: 1, Rosters: 10, Questions: 57, Static texts: 10, Variables: 8.

### AGRICULTURE AUX CHAMPS

No sub-sections, Rosters: 2, Questions: 26, Static texts: 4, Variables: 1.

### LES CHAMPS DU MÉNAGE

No sub-sections, Rosters: 2, Questions: 15, Variables: 4.

### LES CULTURES SPÉCIFIQUES

Sub-sections: 1, Rosters: 3, Questions: 40, Static texts: 1.

### HANDICAPS

No sub-sections, Rosters: 2, Questions: 19.

### ÉMIGRATION

No sub-sections, Rosters: 1, Questions: 28, Static texts: 1, Variables: 2.

### IMMIGRATION

Sub-sections: 1, Rosters: 2, Questions: 29, Static texts: 1, Variables: 2.

### DÉCÈS

No sub-sections, Rosters: 1, Questions: 10, Static texts: 3, Variables: 1.

## TEST GPS

No sub-sections, No rosters, Questions: 1, Static texts: 3, Variables: 2.

## APPENDIX A — ENABLING CONDITIONS

## APPENDIX B — VALIDATION CONDITIONS AND MESSAGES

## APPENDIX C — CATEGORIES

## APPENDIX D — VARIABLES

## APPENDIX E — CATEGORIES FILTERS

## LEGEND

SURVEY IDENTIFICATION INFORMATION  
QUESTIONNAIRE DESCRIPTION

Basic information

*Title* CHES-RS

*Subtitle* Census de recensement HDSS Nouna

*Version identifier* ver.1

Survey data information

*Study type* Demographic and Health Survey

*Kind of data* Census/enumeration data [cen]

*Mode of Data Collection* CAPI

Survey information

*Country* Burkina Faso

*Year* 2019

*Languages* French

*Unit of analysis* Household

*Coverage* HDSS Nouna

*Funding* HIGH - Universitätsklinikum Heidelberg

COVER

|                                                                              |                                                                                                                        |
|------------------------------------------------------------------------------|------------------------------------------------------------------------------------------------------------------------|
| Ménage                                                                       | TEXT <div>showLocation</div> <div></div>                                                                               |
| Chef Ménage                                                                  | TEXT <div>showFirstCHM</div> <div></div>                                                                               |
| Sélectionné:<br>I Round 1: 10% sample for asking Morbitié & Revenus/Dépenses | SINGLE-SELECT <div>round1sampled</div> <div>01 <input type="radio"/> Oui</div> <div>02 <input type="radio"/> Non</div> |
| Coordonnées                                                                  | GPS <div>location</div> <div>N</div> <div>W</div> <div>A</div>                                                         |

# INTRODUCTION

|                                                                                                         |                                                                                                               |
|---------------------------------------------------------------------------------------------------------|---------------------------------------------------------------------------------------------------------------|
| VARIABLE<br>false                                                                                       | BOOLEAN<br>test<br>This variable is excluded from the exported data                                           |
| Country<br>E test==true                                                                                 | SINGLE-SELECT<br>tcountry<br>01 <input type="radio"/> Burkina Faso<br>02 <input type="radio"/> Kenya          |
| VARIABLE<br>1 /* 1 Burkina */ /* 2 Kenya */                                                             | LONG<br>country                                                                                               |
| Type of survey?<br>E test==true                                                                         | SINGLE-SELECT<br>tsurvey<br>01 <input type="radio"/> HDSS<br>02 <input type="radio"/> P1/P2                   |
| VARIABLE<br>1 /* 1 HDSS2.0 2 P1/P2 */                                                                   | LONG<br>survey                                                                                                |
| VARIABLE<br>"#ff8800"                                                                                   | STRING<br>colorEmphasis                                                                                       |
| VARIABLE<br>1                                                                                           | LONG<br>round                                                                                                 |
| VARIABLE<br>false                                                                                       | BOOLEAN<br>newHousehold                                                                                       |
| TEMPORARY PRELOADED ROUND 1: "HH had Births After the Census" flag (1 or NULL)                          | TEXT<br>SCOPE: HIDDEN<br>bac<br>.....                                                                         |
| Date of previous visit                                                                                  | DATE<br>SCOPE: HIDDEN<br>dateLastVisit<br>.....                                                               |
| VARIABLE<br>IsAnswered(dateLastVisit) ? dateLastVisit : new DateTime(2019, 10, 1) /* start of census */ | DATETIME<br>dateBase                                                                                          |
| VARIABLE<br>dateBase.Value.Date.ToString("dd MMMM yyyy")                                                | STRING<br>dateBasePretty                                                                                      |
| Assignment ID<br>E false                                                                                | TEXT<br>assignment_id<br>.....                                                                                |
| Commune<br>E false                                                                                      | SINGLE-SELECT<br>SCOPE: HIDDEN<br>comm<br>01 <input type="radio"/> Nouna<br>02 <input type="radio"/> Bourasso |

|                                                                                                                            |                                                                                                                                                                                                                                                                                                                                                                                                                                                                                                                                                                                                                                                                                                                                                                                                                                                                                                                                                                                                                                                                                                                                                                                                                                       |
|----------------------------------------------------------------------------------------------------------------------------|---------------------------------------------------------------------------------------------------------------------------------------------------------------------------------------------------------------------------------------------------------------------------------------------------------------------------------------------------------------------------------------------------------------------------------------------------------------------------------------------------------------------------------------------------------------------------------------------------------------------------------------------------------------------------------------------------------------------------------------------------------------------------------------------------------------------------------------------------------------------------------------------------------------------------------------------------------------------------------------------------------------------------------------------------------------------------------------------------------------------------------------------------------------------------------------------------------------------------------------|
| <p>Village</p> <p>I Tapez partie du nom du village, et sélectionnez de la liste</p>                                        | <p>SINGLE-SELECT: COMBO BOX<br/>SCOPE: HIDDEN</p> <p>vill</p> <div> <div>02</div> <div><input type="radio"/> Toni</div> </div> <div> <div>05</div> <div><input type="radio"/> Boron</div> </div> <div> <div>08</div> <div><input type="radio"/> Cissé</div> </div> <div> <div>09</div> <div><input type="radio"/> Dankoumana</div> </div> <div> <div>10</div> <div><input type="radio"/> Dembeléla</div> </div> <div> <div>11</div> <div><input type="radio"/> Denissa</div> </div> <div> <div>12</div> <div><input type="radio"/> Denissa Mossi</div> </div> <div> <div>14</div> <div><input type="radio"/> Dionkongo</div> </div> <div> <div>15</div> <div><input type="radio"/> Dina</div> </div> <div> <div>16</div> <div><input type="radio"/> Dokoura</div> </div> <div> <div>17</div> <div><input type="radio"/> Goni</div> </div> <div> <div>18</div> <div><input type="radio"/> Kamadena</div> </div> <div> <div>19</div> <div><input type="radio"/> Kèmena</div> </div> <div> <div>21</div> <div><input type="radio"/> Koro</div> </div> <div> <div>23</div> <div><input type="radio"/> Leï</div> </div> <div> <div>27</div> <div><input type="radio"/> Ouetté</div> </div> <p><a href="#">And 43 other symbols [2]</a></p> |
| <p>Nom du nouveaux village</p> <p>E vill &gt;= 990</p>                                                                     | <p>TEXT</p> <p>nouveau_village</p> <div> <div></div> <div></div> </div>                                                                                                                                                                                                                                                                                                                                                                                                                                                                                                                                                                                                                                                                                                                                                                                                                                                                                                                                                                                                                                                                                                                                                               |
| <p>Milieu de Residence</p>                                                                                                 | <p>SINGLE-SELECT</p> <p>milieu</p> <div> <div>01</div> <div><input type="radio"/> Urbain</div> </div> <div> <div>02</div> <div><input type="radio"/> Rural</div> </div>                                                                                                                                                                                                                                                                                                                                                                                                                                                                                                                                                                                                                                                                                                                                                                                                                                                                                                                                                                                                                                                               |
| <p>Quartier/Secteur</p> <p>I Écrire 00 s'il n'y a pas des secteurs.</p>                                                    | <p>TEXT<br/>SCOPE: HIDDEN</p> <p>quartier</p> <div> <div></div> <div></div> </div>                                                                                                                                                                                                                                                                                                                                                                                                                                                                                                                                                                                                                                                                                                                                                                                                                                                                                                                                                                                                                                                                                                                                                    |
| <p>Numero Concession</p> <p>I 9999 - si c'est une nouvelle concession</p>                                                  | <p>TEXT<br/>SCOPE: HIDDEN</p> <p>numConcession</p> <div> <div></div> <div></div> </div>                                                                                                                                                                                                                                                                                                                                                                                                                                                                                                                                                                                                                                                                                                                                                                                                                                                                                                                                                                                                                                                                                                                                               |
| <p>VARIABLE</p> <p>vill + quartier + numConcession</p>                                                                     | <p>STRING</p> <p>idConcession</p>                                                                                                                                                                                                                                                                                                                                                                                                                                                                                                                                                                                                                                                                                                                                                                                                                                                                                                                                                                                                                                                                                                                                                                                                     |
| <p>Id Ménage</p>                                                                                                           | <p>TEXT<br/>SCOPE: HIDDEN</p> <p>idMenage</p> <div> <div></div> <div></div> </div>                                                                                                                                                                                                                                                                                                                                                                                                                                                                                                                                                                                                                                                                                                                                                                                                                                                                                                                                                                                                                                                                                                                                                    |
| <p>Appuyer pour enregistrer la date</p>                                                                                    | <p>DATE: CURRENT TIME</p> <p>dateEntree</p> <div> <div></div> <div></div> </div>                                                                                                                                                                                                                                                                                                                                                                                                                                                                                                                                                                                                                                                                                                                                                                                                                                                                                                                                                                                                                                                                                                                                                      |
| <p>Avez-vous activé le <u>Mode Avion</u> de la tablette?</p> <p><a href="#">S'il vous plait verifiez et l'activez!</a></p> | <p>SINGLE-SELECT</p> <p>airplaneMode</p> <div> <div>01</div> <div><input type="radio"/> Oui</div> </div> <div> <div>02</div> <div><input type="radio"/> Non</div> </div>                                                                                                                                                                                                                                                                                                                                                                                                                                                                                                                                                                                                                                                                                                                                                                                                                                                                                                                                                                                                                                                              |

STATIC TEXT

E airplaneMode==2

Si vous ne savez pas comment activer le Mode Avion, demandez votre superviseur.

|                                                                                     |                                                              |
|-------------------------------------------------------------------------------------|--------------------------------------------------------------|
| Appuyer pour enregistrer les coordonnées GPS                                        | GPS<br>gps                                                   |
|                                                                                     | N                                                            |
|                                                                                     | W                                                            |
|                                                                                     | A                                                            |
| VARIABLE<br>gps.Accuracy                                                            | DOUBLE<br>gps_accuracy                                       |
| STATIC TEXT                                                                         |                                                              |
| GPS Accuracy: %gps_accuracy%                                                        |                                                              |
| VARIABLE<br>50                                                                      | DOUBLE<br>maxGPSdifference                                   |
| VARIABLE<br>(double)Math.Round((decimal)gps.GpsDistance(location),0)                | DOUBLE<br>GPSdist                                            |
| VARIABLE<br>(double)Math.Round((decimal)GPSdist/1000,0)                             | DOUBLE<br>GPSdistKm                                          |
| STATIC TEXT                                                                         |                                                              |
| E GPSdist>maxGPSdifference && GPSdist<1000                                          |                                                              |
| Tu es %GPSdist% m de la position enregistrée pour cette concession!                 |                                                              |
| STATIC TEXT                                                                         |                                                              |
| E GPSdist>maxGPSdifference && GPSdist>=1000                                         |                                                              |
| Tu es %GPSdistKm% km de la position enregistrée pour cette concession!              |                                                              |
| STATIC TEXT                                                                         |                                                              |
| E !IsAnswered(gps) && !(IsAnswered(latitudeManual) && IsAnswered(longitudeManual) ) |                                                              |
| Aucune mesure valide de GPS                                                         |                                                              |
| Voulez vous enregistrer les coordonnées GPS manuellement?                           | SINGLE-SELECT<br>gpsExterne                                  |
| E !IsAnswered(gps)                                                                  | 01 <input type="radio"/> Oui<br>02 <input type="radio"/> Non |
| Latitude                                                                            | NUMERIC: DECIMAL<br>latitudeManual                           |
| E gpsExterne==1                                                                     |                                                              |
| Longitude                                                                           | NUMERIC: DECIMAL<br>longitudeManual                          |
| E gpsExterne==1                                                                     |                                                              |

|                                |                                                                                                                                                                                                                                                                                                      |
|--------------------------------|------------------------------------------------------------------------------------------------------------------------------------------------------------------------------------------------------------------------------------------------------------------------------------------------------|
| L'interview peut être réalisé? | <div><div>SINGLE-SELECT</div><div>result</div><div><div>01</div><div><div><div></div></div>Oui, interview peut être réali<br/>sé</div></div><div>02</div><div><div><div></div></div>Non - Refusé</div></div> <div>03</div> <div><div><div></div></div>Non - ménage n'a pas pu êtr<br/>e trouvé</div> |
|--------------------------------|------------------------------------------------------------------------------------------------------------------------------------------------------------------------------------------------------------------------------------------------------------------------------------------------------|

04

Non - il n y avait personne a  
u ménage

05

Non - le ménage n'a pas pu  
être accédé

06

Non - tout le ménage a dém  
énagé

07

Non - tout le ménage est dé  
cédé

09

Non - autre raison

|                                                                          |                                                                                                                                                    |              |
|--------------------------------------------------------------------------|----------------------------------------------------------------------------------------------------------------------------------------------------|--------------|
| <div>Le consentement éclairé est-il signé ?</div> <div>E result==1</div> | <div>SINGLE-SELECT</div> <div><div>01</div><div><input type="radio"/> Oui</div></div> <div><div>02</div><div><input type="radio"/> Non</div></div> | consentement |
|--------------------------------------------------------------------------|----------------------------------------------------------------------------------------------------------------------------------------------------|--------------|

# IDENTIFICATION MÉNAGE

E \$OK1

|                                                                                                                                                                                                         |                                                                                                                                |
|---------------------------------------------------------------------------------------------------------------------------------------------------------------------------------------------------------|--------------------------------------------------------------------------------------------------------------------------------|
| <div>VARIABLE</div> <div>"blue"</div>                                                                                                                                                                   | <div>STRING</div> <div>colorName</div>                                                                                         |
| <div>Quel é le nom du Chef de Ménage?</div> <div>E !(continuation==true) &amp;&amp;false</div>                                                                                                          | <div>TEXT</div> <div>nomChefMenage</div> <div>.....</div>                                                                      |
| <div>Est-ce que %showFirstCHM% est le Chef de Ménage?</div> <div>E !(continuation==true)</div>                                                                                                          | <div>SINGLE-SELECT</div> <div>confirmCHM</div> <div>01 <input type="radio"/> Oui</div> <div>02 <input type="radio"/> Non</div> |
| <div>Selectionnez le nouveau Chef de Ménage<br/>(Si la personne n'est pas dans la liste,<br/>allez a la [liste des membres](membres) e ajout<br/>ez cette personne!)</div> <div>E confirmCHM == 2</div> | <div>SINGLE-SELECT: LINKED</div> <div>nouveauCHM</div> <div>SOURCE OF CATEGORIES: ROSTER <a href="#">MEMBRE</a></div>          |
| <div>Code Ménage</div> <div>E // /* for P1P2 -&gt; */ false true</div>                                                                                                                                  | <div>TEXT</div> <div>codeMenage</div> <div>SCOPE: HIDDEN</div> <div>.....</div>                                                |
| <div>VARIABLE</div> <div>idConcession + codeMenage</div>                                                                                                                                                | <div>STRING</div> <div>new_idMenage</div>                                                                                      |
| <div>VARIABLE</div> <div>codeMenage.ToUpper().ToCharArray()[0] == 'x'    codeMena<br/>ge.ToUpper().ToCharArray()[0] == 'y'    codeMenage.ToUpp<br/>er().ToCharArray()[0] == 'z'</div>                   | <div>BOOLEAN</div> <div>continuation</div>                                                                                     |
| <div>VARIABLE</div> <div>continuation==true ? "(continuu)" : "de"</div>                                                                                                                                 | <div>STRING</div> <div>continuationMark</div>                                                                                  |
| <div>Numéro de téléphone du Chef de Ménage</div> <div>E continuation!=true</div>                                                                                                                        | <div>TEXT</div> <div>phoneChefMenage</div> <div>.....</div>                                                                    |
| <div>Nombre Individus (MAS)</div> <div>E continuation!=true &amp;&amp;false</div>                                                                                                                       | <div>NUMERIC: INTEGER</div> <div>numIndividu_mas</div> <div>.....</div>                                                        |
| <div>Nombre Individus (FEM)</div> <div>E continuation!=true &amp;&amp;false</div>                                                                                                                       | <div>NUMERIC: INTEGER</div> <div>numIndividu_fem</div> <div>.....</div>                                                        |

## IDENTIFICATION MÉNAGE HABITAT ET CONDITIONS DE VIE

E continuation!=true && !\$P1P2

|                                                                                                            |                                                                                                                                                                                                                                                                                                                                                           |
|------------------------------------------------------------------------------------------------------------|-----------------------------------------------------------------------------------------------------------------------------------------------------------------------------------------------------------------------------------------------------------------------------------------------------------------------------------------------------------|
| Quel est le statut d'occupation du logement principale?                                                    | SINGLE-SELECT <span style="float: right;">q102</span><br>01 <input type="radio"/> Propriétaire<br>02 <input type="radio"/> Locataire<br>03 <input type="radio"/> Logé par employeur<br>04 <input type="radio"/> Logé par parents/Amis<br>05 <input type="radio"/> Autre                                                                                   |
| Quel autre statut?                                                                                         | TEXT <span style="float: right;">q102autre</span><br>.....                                                                                                                                                                                                                                                                                                |
| E q102==5                                                                                                  |                                                                                                                                                                                                                                                                                                                                                           |
| Quel est le type d'habitat du logement principal du ménage ?                                               | SINGLE-SELECT <span style="float: right;">q101</span><br>01 <input type="radio"/> Case ronde<br>02 <input type="radio"/> Maison isolée simple<br>03 <input type="radio"/> Villa/Mini-villa<br>04 <input type="radio"/> Bâtiment à plusieurs logements<br>05 <input type="radio"/> Immeuble à appartements<br>06 <input type="radio"/> Autres (à préciser) |
| Quel autre type?                                                                                           | TEXT <span style="float: right;">q101autre</span><br>.....                                                                                                                                                                                                                                                                                                |
| E q101==6                                                                                                  |                                                                                                                                                                                                                                                                                                                                                           |
| Quel est le nombre de pièces du logement?                                                                  | NUMERIC: INTEGER <span style="float: right;">q105</span><br>-----                                                                                                                                                                                                                                                                                         |
| Quelle est la nature du matériau principal du <u>m</u><br><u>ur</u> de l'habitation principale du ménage ? | SINGLE-SELECT <span style="float: right;">q106</span><br>01 <input type="radio"/> Dur<br>02 <input type="radio"/> Semi-dur<br>03 <input type="radio"/> Banco<br>04 <input type="radio"/> Paille<br>06 <input type="radio"/> Pierre en carrière /cailloux<br>05 <input type="radio"/> Autre                                                                |
| Quel autre?                                                                                                | TEXT <span style="float: right;">q106autre</span><br>.....                                                                                                                                                                                                                                                                                                |
| E q106==5                                                                                                  |                                                                                                                                                                                                                                                                                                                                                           |
| De quels principaux matériaux est fait le <u>sol</u> de l'habitation principale du ménage ?                | SINGLE-SELECT <span style="float: right;">q107</span><br>01 <input type="radio"/> Moquette / parquet<br>02 <input type="radio"/> Bois poli<br>03 <input type="radio"/> Carreaux<br>04 <input type="radio"/> Vinyle<br>05 <input type="radio"/> Ciment<br>06 <input type="radio"/> Terre battue / Sable<br>09 <input type="radio"/> Autre (à préciser)     |

|                                                                                                                                     |                                                                                                                                                                                                                                                                                                                                                |
|-------------------------------------------------------------------------------------------------------------------------------------|------------------------------------------------------------------------------------------------------------------------------------------------------------------------------------------------------------------------------------------------------------------------------------------------------------------------------------------------|
| <p>Quels autres matériaux?</p> <p>E q107==9</p>                                                                                     | <p>TEXT q107autre</p> <p>.....</p>                                                                                                                                                                                                                                                                                                             |
| <p>Quels sont les principaux matériaux du <u>toit</u> de l'habitation principale du ménage ?</p>                                    | <p>SINGLE-SELECT q108</p> <p>01 <input type="radio"/> Béton</p> <p>02 <input type="radio"/> Tuiles</p> <p>03 <input type="radio"/> Tôles</p> <p>04 <input type="radio"/> Paille/Feuille</p> <p>05 <input type="radio"/> Banco / Terre Battue</p> <p>06 <input type="radio"/> Autre</p>                                                         |
| <p>Quels autres matériaux?</p> <p>E q108==6</p>                                                                                     | <p>TEXT q108autre</p> <p>.....</p>                                                                                                                                                                                                                                                                                                             |
| <p>Quel type de toilettes utilisez-vous?</p> <p>I Réponses multiples - commencez avec celui qui est utilisé le plus fréquemment</p> | <p>MULTI-SELECT: ORDERED q109</p> <p>01 <input type="checkbox"/> WC avec chasse eau</p> <p>02 <input type="checkbox"/> Latrines aménagées</p> <p>03 <input type="checkbox"/> Latrines non aménagées</p> <p>04 <input type="checkbox"/> Pas de toilette / nature</p> <p>05 <input type="checkbox"/> Autre</p>                                   |
| <p>Quel autre type?</p> <p>E q109.Contains(5)</p>                                                                                   | <p>TEXT q109autre</p> <p>.....</p>                                                                                                                                                                                                                                                                                                             |
| <p>Quelle principale source d'<u>énergie de cuisson</u> utilisez-vous?</p>                                                          | <p>SINGLE-SELECT q110</p> <p>01 <input type="radio"/> Electricité / Gaz</p> <p>02 <input type="radio"/> Réchaud à pétrole</p> <p>03 <input type="radio"/> Charbon de bois</p> <p>04 <input type="radio"/> Bois à bruler</p> <p>05 <input type="radio"/> Paille</p> <p>06 <input type="radio"/> Bouse</p> <p>09 <input type="radio"/> Autre</p> |
| <p>Quelle autre source?</p> <p>E q110==9</p>                                                                                        | <p>TEXT q110autre</p> <p>.....</p>                                                                                                                                                                                                                                                                                                             |

|                                                                                                                                                         |                                                                                                                                                                                                                                                                                                                                                                                                                                                                                                                                                                                                                                                                      |
|---------------------------------------------------------------------------------------------------------------------------------------------------------|----------------------------------------------------------------------------------------------------------------------------------------------------------------------------------------------------------------------------------------------------------------------------------------------------------------------------------------------------------------------------------------------------------------------------------------------------------------------------------------------------------------------------------------------------------------------------------------------------------------------------------------------------------------------|
| Quelle principale source d'énergie d'éclairage utilisez-vous?                                                                                           | <div>SINGLE-SELECT <span>q110a</span></div> <div> <input type="radio"/> 01 Electricité Sonabel<br/> <input type="radio"/> 02 Groupe électrogène<br/> <input type="radio"/> 03 Plaque solaire<br/> <input type="radio"/> 04 Batterie<br/> <input type="radio"/> 05 Lampe à gaz<br/> <input type="radio"/> 06 Lampe à pétrole<br/> <input type="radio"/> 07 Lampe à huile<br/> <input type="radio"/> 08 Lampe torche<br/> <input type="radio"/> 09 Bougie<br/> <input type="radio"/> 10 Bois / paille<br/> <input type="radio"/> 99 Autre         </div>                                                                                                               |
| Quelle autre source?                                                                                                                                    | <div>TEXT <span>q110aautre</span></div> <div>.....</div>                                                                                                                                                                                                                                                                                                                                                                                                                                                                                                                                                                                                             |
| Quelle est la source principale d'eau de boisson en saison sèche ?<br><br>I choix multiples – commencez avec celui qui est utilisé le plus fréquemment. | <div>SINGLE-SELECT <span>q111</span></div> <div> <input type="radio"/> 01 Puits creusé non protégé<br/> <input type="radio"/> 02 Source non protégée<br/> <input type="radio"/> 03 Camion citerne/charrette avec petite citerne<br/> <input type="radio"/> 04 Eau de surface<br/> <input type="radio"/> 10 Eau en bouteille/sachet<br/> <input type="radio"/> 11 Robinet dans logement/concession<br/> <input type="radio"/> 12 Robinet public/fontaine<br/> <input type="radio"/> 13 Puits à pompe/forage<br/> <input type="radio"/> 14 Puits creusé protégé<br/> <input type="radio"/> 15 Source d'eau protégée<br/> <input type="radio"/> 99 Autre         </div> |
| Quelle autre eau de boisson?                                                                                                                            | <div>TEXT <span>q111autre</span></div> <div>.....</div>                                                                                                                                                                                                                                                                                                                                                                                                                                                                                                                                                                                                              |

|                                                                                                                                                                    |                                                                                                                                                                                                                                                                                                                                                                                                                                                                                                                                                                                                                                                                                              |
|--------------------------------------------------------------------------------------------------------------------------------------------------------------------|----------------------------------------------------------------------------------------------------------------------------------------------------------------------------------------------------------------------------------------------------------------------------------------------------------------------------------------------------------------------------------------------------------------------------------------------------------------------------------------------------------------------------------------------------------------------------------------------------------------------------------------------------------------------------------------------|
| <p>Quelle est la source principale d'eau de boisson en saison pluvieuse ?</p> <p>I choix multiples – commencez avec celui qui est utilisé le plus fréquemment.</p> | <p>SINGLE-SELECT <span style="float: right;">q112</span></p> <p>01 <input type="radio"/> Puits creusé non protégé</p> <p>02 <input type="radio"/> Source non protégée</p> <p>03 <input type="radio"/> Camion citerne/charrette avec petite citerne</p> <p>04 <input type="radio"/> Eau de surface</p> <p>10 <input type="radio"/> Eau en bouteille/sachet</p> <p>11 <input type="radio"/> Robinet dans logement/concession</p> <p>12 <input type="radio"/> Robinet public/fontaine</p> <p>13 <input type="radio"/> Puits à pompe/forage</p> <p>14 <input type="radio"/> Puits creusé protégé</p> <p>15 <input type="radio"/> Source d'eau protégée</p> <p>99 <input type="radio"/> Autre</p> |
| <p>Quelle autre eau de boisson?</p> <p>E q112==99</p>                                                                                                              | <p>TEXT <span style="float: right;">q112autre</span></p> <p>.....</p>                                                                                                                                                                                                                                                                                                                                                                                                                                                                                                                                                                                                                        |
| <p>Temps de trajet pour s'approvisionner en eau de boisson</p>                                                                                                     | <p>SINGLE-SELECT <span style="float: right;">tempEau</span></p> <p>01 <input type="radio"/> Eau sur place</p> <p>02 <input type="radio"/> Moins de 30 minutes</p> <p>03 <input type="radio"/> 30 minutes ou plus</p> <p>09 <input type="radio"/> Ne sait pas</p>                                                                                                                                                                                                                                                                                                                                                                                                                             |
| <p>Quel est la distance qui sépare votre ménage à la source d'eau de boisson?</p>                                                                                  | <p>SINGLE-SELECT <span style="float: right;">distEau</span></p> <p>01 <input type="radio"/> Sur place</p> <p>02 <input type="radio"/> Moins d'un km</p> <p>03 <input type="radio"/> 1 à 2 km</p> <p>04 <input type="radio"/> Plus de 2 km</p>                                                                                                                                                                                                                                                                                                                                                                                                                                                |

IDENTIFICATION MÉNAGE

ÉQUIPMENTS DU MÉNAGE

E continuation!=true

Le ménage possède-t-il un de ces équipements ?

E ! \$P1P2

MULTI-SELECT: YES/NOq200

201

☐/ ☐

RADIO

202

☐/ ☐

TELEVISEUR

203

☐/ ☐

LECTEUR VIDEO/CD/D  
VD

204

☐/ ☐

TELEPHONE FIXE

205

☐/ ☐

TELEPHONE PORTABLE

218

☐/ ☐

MOTO

219

☐/ ☐

TRICYCLE

220

☐/ ☐

BICYCLETTE (VÉLO)

206

☐/ ☐

REFRIGERATEUR / CON  
GELATEUR

208

☐/ ☐

PLAQUE A GAZ

209

☐/ ☐

CUISINIÈRE

210

☐/ ☐

RECHAUD A PETROLE /  
GAZ

211

☐/ ☐

PLAQUE ELECTRIQUE

212

☐/ ☐

PLAQUE SOLAIRE

213

☐/ ☐

GROUPE ELECTROGEN  
E

214

☐/ ☐

LAMPE SOLAIRE

And 9 other symbols [3]

IDENTIFICATION MÉNAGE / ÉQUIPMENTS DU MÉNAGE

Roster: DETAILS

generated by multi-select question q200

r200

Combien de %roster% possède le ménage?

NUMERIC: INTEGERq200qty

-----

W1 self <= 10

M1 Ce sont beaucoup de %roster%! Vous êtes sur?

Le ménage possède-t-il des moustiquaires?

SINGLE-SELECTq221

01

☐

Oui

02

☐

Non

Quelle nature?

E false

MULTI-SELECTq221nature

01

☐

Imprégné

02

☐

Non Imprégné

03

☐

Ne sait pas

Nombre des moustiquaires actuellement utilisés?

E false

NUMERIC: INTEGERq221quantite

-----

Combien des moustiquaires non-imprégné possède le ménage?

E q221==1

NUMERIC: INTEGERnbMoustiqNon

-----

Combien des moustiquaires imprégné possède le ménage?

E q221==1

NUMERIC: INTEGERnbMoustiqImp

-----

|                                                                |                                       |
|----------------------------------------------------------------|---------------------------------------|
| Combien des moustiquaires non-classifiées possède le ménage?   | NUMERIC: INTEGER<br>nbMoustiqNonClass |
| E q221==1                                                      |                                       |
| V1 nbMoustiqImp+nbMoustiqNon+nbMoustiqNonClass>0               |                                       |
| M1 Mais vous avez dit que le ménage possède des moustiquaires! |                                       |

IDENTIFICATION MÉNAGE  
ANIMAUX

E continuation!=true && !\$P1P2

STATIC TEXT

Demandez au *chef de ménage (ou à son représentant)* uniquement, si son ménage possède les animaux énoncés dans la grille ci-dessous.

|                                                      |                                                              |
|------------------------------------------------------|--------------------------------------------------------------|
| Le ménage possède-t-il l'un des animaux énoncés?     | SINGLE-SELECT<br>animaux                                     |
| I Volailles Moutons Chèvres Bœufs Anes Porcs Chevaux | 01 <input type="radio"/> Oui<br>02 <input type="radio"/> Non |
| Nombre des Volailles                                 | NUMERIC: INTEGER<br>nbvolailles                              |
| E animaux==1                                         |                                                              |
| W1 self<1000                                         |                                                              |
| M1 Doit être entre 0 e 999                           | SPECIAL VALUES<br>00 Néant                                   |
| Nombre des Moutons                                   | NUMERIC: INTEGER<br>nbMoutons                                |
| E animaux==1                                         |                                                              |
| W1 self<1000                                         |                                                              |
| M1 Doit être entre 0 e 999                           | SPECIAL VALUES<br>00 Néant                                   |
| Nombre des Chèvres                                   | NUMERIC: INTEGER<br>nbChevres                                |
| E animaux==1                                         |                                                              |
| W1 self<1000                                         |                                                              |
| M1 Doit être entre 0 e 999                           | SPECIAL VALUES<br>00 Néant                                   |
| Nombre des Bœufs                                     | NUMERIC: INTEGER<br>nbBoeufs                                 |
| E animaux==1                                         |                                                              |
| W1 self<1000                                         |                                                              |
| M1 Doit être entre 0 e 999                           | SPECIAL VALUES<br>00 Néant                                   |
| Nombre des Anes                                      | NUMERIC: INTEGER<br>nbAnes                                   |
| E animaux==1                                         |                                                              |
| W1 self<1000                                         |                                                              |
| M1 Doit être entre 0 e 999                           | SPECIAL VALUES<br>00 Néant                                   |

|                                                                                                                                                                                                                                                                                                                                           |                                                                                                                     |
|-------------------------------------------------------------------------------------------------------------------------------------------------------------------------------------------------------------------------------------------------------------------------------------------------------------------------------------------|---------------------------------------------------------------------------------------------------------------------|
| <div>Nombre des Porcs</div> <div>E animaux==1</div> <div>W1 self&lt;1000</div> <div>M1 Doit être entre 0 e 999</div>                                                                                                                                                                                                                      | <div>NUMERIC: INTEGERnbPorcs</div> <div>-----</div> <div>SPECIAL VALUES</div> <div>00Néant</div>                    |
| <div>Nombre des Chevaux</div> <div>E animaux==1</div> <div>W1 self&lt;1000</div> <div>M1 Doit être entre 0 e 999</div> <div>V2 nbVolailles+nbMoutons+nbChevres+nbBoeufs+nbAnes+nbPorcs+nbChevaux &gt; 0</div> <div>M2 Vous n'avez pas indiqué un seul animal. &lt;br&gt;Mais vous avez dit que vous avez des animaux [ici](animaux)</div> | <div>NUMERIC: INTEGERnbChevaux</div> <div>-----</div> <div>SPECIAL VALUES</div> <div>00Néant</div>                  |
| <div>Enquêteur: Qui a répondu ces sections?</div> <div>E continuation!=true</div>                                                                                                                                                                                                                                                         | <div>SINGLE-SELECT: LINKEDrepondantBiensMenage</div> <div>SOURCE OF CATEGORIES: ROSTER <a href="#">MEMBRE</a></div> |
| <div>VARIABLE</div> <div>membre.Count(x =&gt; x.repondantNaissance != null)</div>                                                                                                                                                                                                                                                         | <div>LONGtotalNewBorns</div>                                                                                        |

# MEMBRES DU MÉNAGE

E \$OK1 || \$allDead || \$allLeft

STATIC TEXT

E bac == "1" &&false

*Ce ménage a rapporté un nouveau-né après le census!  
N'oubliez pas de l'ajouter !!!*

|                                                                                                          |                 |
|----------------------------------------------------------------------------------------------------------|-----------------|
| Entrez le prénom de chaque membre du ménage<br>(même s'ils sont décédés ou parti après %dateBasePretty%) | LIST<br>membres |
| I Commencer avec le Chef de Ménage!                                                                      |                 |

MEMBRES DU MÉNAGE

Roster: DÉTAILS

generated by list question membres

membre

|                                                                                       |                                                                                                                  |
|---------------------------------------------------------------------------------------|------------------------------------------------------------------------------------------------------------------|
| Juok name of %membre%                                                                 | TEXT<br>juok_name                                                                                                |
| E \$country==2                                                                        |                                                                                                                  |
| Nom de %membre%                                                                       | TEXT<br>nom                                                                                                      |
| Have the data for this member been preloaded?<br>(will be hidden!)                    | SINGLE-SELECT<br>SCOPE: HIDDEN<br>preloadedMember<br>01 <input type="radio"/> Yes<br>02 <input type="radio"/> No |
| ID membre                                                                             | TEXT<br>SCOPE: HIDDEN<br>preloadedMemberId                                                                       |
| newID from census (for identifying members without id, unknown before the census)     | TEXT<br>SCOPE: HIDDEN<br>censusID                                                                                |
| VARIABLE<br>idMenage + ((@rowindex<9)?"00": ((@rowindex<99)?"0": "")) + (@rowindex+1) | STRING<br>id_membre                                                                                              |
| VARIABLE<br>@rowindex+1                                                               | LONG<br>rang                                                                                                     |
| Rang enregistré                                                                       | NUMERIC: INTEGER<br>SCOPE: HIDDEN<br>preloadedRang                                                               |

STATIC TEXT

E false

*ID membre: %id\_membre%*

STATIC TEXT

E confirmCHM==2

Selectionnez le lien avec le nouveau Chef de Ménage!

|                                                                                                                                                                                                                                                                                                                                                                                                                                                               |                                                                                                                                                                                                                                                                                                                                                                                                                                                                                                                                                                                                                                                                                                                                                                                                                                                                                                                                                                                                                                                                                                                                                                                                                                                                                                                                                                                                                                                                                             |
|---------------------------------------------------------------------------------------------------------------------------------------------------------------------------------------------------------------------------------------------------------------------------------------------------------------------------------------------------------------------------------------------------------------------------------------------------------------|---------------------------------------------------------------------------------------------------------------------------------------------------------------------------------------------------------------------------------------------------------------------------------------------------------------------------------------------------------------------------------------------------------------------------------------------------------------------------------------------------------------------------------------------------------------------------------------------------------------------------------------------------------------------------------------------------------------------------------------------------------------------------------------------------------------------------------------------------------------------------------------------------------------------------------------------------------------------------------------------------------------------------------------------------------------------------------------------------------------------------------------------------------------------------------------------------------------------------------------------------------------------------------------------------------------------------------------------------------------------------------------------------------------------------------------------------------------------------------------------|
| <div>Lien de parenté avec CM</div> <div>V1 /* \$HDSS ? (@rowcode&gt;1 ? membre.Count(x =&gt; x.parente == 1546) == 1 : true) : true */ membre.Count(x =&gt; x.parente == 1546) &lt; 2</div> <div>M1 Il peut avoir seulement 1 Chef!</div> <div>V2 /* in a survey the 1st member may not be the CHM! */ \$HDSS &amp;&amp; confirmCHM == 1 ? (@rowcode == 1 ? self == 1546 : true) : true</div> <div>M2 Le premier faut être toujours le CHEF DE MÉNAGE !</div> | <div>SINGLE-SELECT<div>parente</div><div><div>01546</div><div><input type="radio"/></div><div>Chef de ménage</div></div><div><div>03108</div><div><input type="radio"/></div><div>Epouse/époux</div></div><div><div>01720</div><div><input type="radio"/></div><div>Coépouse</div></div><div><div>03599</div><div><input type="radio"/></div><div>Fils/fille</div></div><div><div>03042</div><div><input type="radio"/></div><div>Enfant adopté/confié</div></div><div><div>03826</div><div><input type="radio"/></div><div>Frère/sœur</div></div><div><div>10157</div><div><input type="radio"/></div><div>Père /mère</div></div><div><div>10275</div><div><input type="radio"/></div><div>Petit Fils/fille</div></div><div><div>08913</div><div><input type="radio"/></div><div>Neveu/nièce</div></div><div><div>09804</div><div><input type="radio"/></div><div>Oncle/tante</div></div><div><div>03047</div><div><input type="radio"/></div><div>Enfant conjoint(e)</div></div><div><div>04446</div><div><input type="radio"/></div><div>Grand-père/grand-mère</div></div><div><div>04173</div><div><input type="radio"/></div><div>Gendre/belle fille</div></div><div><div>00823</div><div><input type="radio"/></div><div>Beau-frère/belle sœur</div></div><div><div>00539</div><div><input type="radio"/></div><div>Autre parent</div></div><div><div>00531</div><div><input type="radio"/></div><div>Aucun lien</div></div></div> <div><a href="#">And 1 other symbols [4]</a></div> |
|---------------------------------------------------------------------------------------------------------------------------------------------------------------------------------------------------------------------------------------------------------------------------------------------------------------------------------------------------------------------------------------------------------------------------------------------------------------|---------------------------------------------------------------------------------------------------------------------------------------------------------------------------------------------------------------------------------------------------------------------------------------------------------------------------------------------------------------------------------------------------------------------------------------------------------------------------------------------------------------------------------------------------------------------------------------------------------------------------------------------------------------------------------------------------------------------------------------------------------------------------------------------------------------------------------------------------------------------------------------------------------------------------------------------------------------------------------------------------------------------------------------------------------------------------------------------------------------------------------------------------------------------------------------------------------------------------------------------------------------------------------------------------------------------------------------------------------------------------------------------------------------------------------------------------------------------------------------------|

|                                                                                                                                                                                                                                       |                                                                                                                                                                                                                                                                                                                                                                                                                                                                                                                                                                                                                                                                                                                                      |
|---------------------------------------------------------------------------------------------------------------------------------------------------------------------------------------------------------------------------------------|--------------------------------------------------------------------------------------------------------------------------------------------------------------------------------------------------------------------------------------------------------------------------------------------------------------------------------------------------------------------------------------------------------------------------------------------------------------------------------------------------------------------------------------------------------------------------------------------------------------------------------------------------------------------------------------------------------------------------------------|
| <div>Date de Naissance - Année</div> <div>E \$expectedPresent</div> <div>V1 self.InRange(1900, dateEntree.Value.Year)    self==9999</div> <div>M1 L'année doit être entre 1900 et la date d'aujourd'hui</div>                         | <div>NUMERIC: INTEGER</div> <div>anneeN</div> <div></div> <div>SPECIAL VALUES</div> <div>9999 Ne sait pas</div>                                                                                                                                                                                                                                                                                                                                                                                                                                                                                                                                                                                                                      |
| <div>Date de Naissance - Mois</div> <div>E anneeN!=9999 &amp;&amp; \$expectedPresent</div>                                                                                                                                            | <div>SINGLE-SELECT</div> <div>moisN</div> <div>01 <input type="radio"/> Janvier</div> <div>02 <input type="radio"/> Février</div> <div>03 <input type="radio"/> Mars</div> <div>04 <input type="radio"/> Avril</div> <div>05 <input type="radio"/> Mai</div> <div>06 <input type="radio"/> Juin</div> <div>07 <input type="radio"/> Juillet</div> <div>08 <input type="radio"/> Août</div> <div>09 <input type="radio"/> Septembre</div> <div>10 <input type="radio"/> Octobre</div> <div>11 <input type="radio"/> Novembre</div> <div>12 <input type="radio"/> Décembre</div> <div>99 <input type="radio"/> Ne sait pas</div>                                                                                                       |
| <div>Date de Naissance - Jour</div> <div>F (@optioncode==30 &amp;&amp; moisN!=2)    (@optioncode==31 &amp;&amp; moisN.InList(1,3,5,7,8,10,12))    @optioncode.InRange(1,29)    @optioncode==99</div> <div>E moisN.InRange(1,12)</div> | <div>SINGLE-SELECT</div> <div>jourN</div> <div>01 <input type="radio"/> 1</div> <div>02 <input type="radio"/> 2</div> <div>03 <input type="radio"/> 3</div> <div>04 <input type="radio"/> 4</div> <div>05 <input type="radio"/> 5</div> <div>06 <input type="radio"/> 6</div> <div>07 <input type="radio"/> 7</div> <div>08 <input type="radio"/> 8</div> <div>09 <input type="radio"/> 9</div> <div>10 <input type="radio"/> 10</div> <div>11 <input type="radio"/> 11</div> <div>12 <input type="radio"/> 12</div> <div>13 <input type="radio"/> 13</div> <div>14 <input type="radio"/> 14</div> <div>15 <input type="radio"/> 15</div> <div>16 <input type="radio"/> 16</div> <div><a href="#">And 16 other symbols [5]</a></div> |
| <div>Age de %membre% (ans):</div> <div>E anneeN==9999</div>                                                                                                                                                                           | <div>NUMERIC: INTEGER</div> <div>reportedAge</div> <div></div>                                                                                                                                                                                                                                                                                                                                                                                                                                                                                                                                                                                                                                                                       |

STATIC TEXT

E age <= 6 && (anneeN==9999 || moisN==99 || jourN==99)

Insistez pour voir un document!

et remplissez l'année, mois et jour!

STATIC TEXT

E \$expectedPresent

Age = %age%

|                                                                                                                                                                                                                      |                                                         |
|----------------------------------------------------------------------------------------------------------------------------------------------------------------------------------------------------------------------|---------------------------------------------------------|
| Comment avez vous validé la date de naissance de %rosteritle%?                                                                                                                                                       | SINGLE-SELECTddnSource                                  |
| E \$expectedPresent                                                                                                                                                                                                  | 02 <input type="radio"/> Avec le carnet de santé        |
|                                                                                                                                                                                                                      | 03 <input type="radio"/> Avec le certificat de naissanc |
|                                                                                                                                                                                                                      | e                                                       |
|                                                                                                                                                                                                                      | 04 <input type="radio"/> CNIB / Passport                |
|                                                                                                                                                                                                                      | 05 <input type="radio"/> Quelqu'un m'a dit              |
|                                                                                                                                                                                                                      | 06 <input type="radio"/> Avec un autre document         |
| Qui vous a renseigné?                                                                                                                                                                                                | TEXTddnSourcewho                                        |
| E ddnSource==5                                                                                                                                                                                                       | .....                                                   |
| Quel autre document?                                                                                                                                                                                                 | TEXTddnSourceother                                      |
| E ddnSource==6                                                                                                                                                                                                       | .....                                                   |
| VARIABLE<br>FullYearsBetween(ddn, dateEntree)                                                                                                                                                                        | LONGageOld                                              |
| VARIABLE<br>IsAnswered(reportedAge) ? reportedAge : ( moisN==99 ? FullYearsBetween(new DateTime((int) anneeN,7,1), dateEntree) : ( jourN==99 ? FullYearsBetween(new DateTime((int) anneeN,(int) moisN,15             | LONGage                                                 |
| <a href="#">And 118 other symbols [1]</a>                                                                                                                                                                            |                                                         |
| VARIABLE<br>CenturyMonthCode(dateEntree.Value.Month, dateEntree.Value.Year) - CenturyMonthCode(ddn.Value.Month, ddn.Value.Year) - ((dateEntree.Value.Day < ddn.Value.Day)?1:0)                                       | LONGageInMonthsOld                                      |
| VARIABLE<br>IsAnswered(reportedAge) ? (long) reportedAge*12 : CenturyMonthCode(dateEntree.Value.Month, dateEntree.Value.Year) - // if don't know month, use June CenturyMonthCode((moisN==99?6:(int) moisN), (int) a | LONGageInMonths1                                        |
| <a href="#">And 113 other symbols [2]</a>                                                                                                                                                                            |                                                         |

STATIC TEXT

E false

Age: %ageInMonths1% months

|                                                                                    |                              |
|------------------------------------------------------------------------------------|------------------------------|
| Est-ce que %membre% est la mère ou la gardienne d'un enfant vivant dans ce ménage? | SINGLE-SELECTmomGuardian     |
| E sexe==2 && age>12 && \$expectedPresent                                           | 01 <input type="radio"/> Oui |
|                                                                                    | 02 <input type="radio"/> Non |
| Est-ce que %membre% %nom% a un surnom?                                             | SINGLE-SELECTexistsNickname  |
| E momGuardian==1    age.InRange(0,4) && \$expectedPresent                          | 01 <input type="radio"/> Oui |
|                                                                                    | 02 <input type="radio"/> Non |
| Quel est le surnom de %membre%?                                                    | TEXTnickname                 |
| E existsNickname==1                                                                | .....                        |

|                                                                           |                                                                                                                                                                                                                                                                                                                                                                                                                                           |
|---------------------------------------------------------------------------|-------------------------------------------------------------------------------------------------------------------------------------------------------------------------------------------------------------------------------------------------------------------------------------------------------------------------------------------------------------------------------------------------------------------------------------------|
| <p>La mère de %membre% vit dans le ménage?</p> <p>E \$expectedPresent</p> | <p>SINGLE-SELECT <span>mereDansMenage</span></p> <p>01 <input type="radio"/> Oui</p> <p>02 <input type="radio"/> Non</p>                                                                                                                                                                                                                                                                                                                  |
| <p>Ethnie</p> <p>E \$expectedPresent</p>                                  | <p>SINGLE-SELECT <span>ethnie</span></p> <p>01 <input type="radio"/> Dafing/Marka</p> <p>02 <input type="radio"/> Bwaba</p> <p>03 <input type="radio"/> Mossi</p> <p>04 <input type="radio"/> Samo</p> <p>05 <input type="radio"/> Peulh</p> <p>06 <input type="radio"/> Dioula</p> <p>07 <input type="radio"/> Bobo</p> <p>08 <input type="radio"/> Autre</p> <p>99 <input type="radio"/> NSP</p>                                        |
| <p>Quelle autre ethnie?</p> <p>E ethnie==8</p>                            | <p>TEXT <span>ethnie_o</span></p> <p>.....</p>                                                                                                                                                                                                                                                                                                                                                                                            |
| <p>Religion</p> <p>E \$expectedPresent</p>                                | <p>SINGLE-SELECT <span>religion</span></p> <p>01 <input type="radio"/> Musulman</p> <p>02 <input type="radio"/> Catholique</p> <p>03 <input type="radio"/> Protestant</p> <p>04 <input type="radio"/> Animiste</p> <p>06 <input type="radio"/> Sans religion</p> <p>05 <input type="radio"/> Autre</p>                                                                                                                                    |
| <p>Quelle autre religion?</p> <p>E religion==5</p>                        | <p>TEXT <span>religion_o</span></p> <p>.....</p>                                                                                                                                                                                                                                                                                                                                                                                          |
| <p>Type d'instruction</p> <p>E age &gt; 5</p>                             | <p>SINGLE-SELECT <span>instruction</span></p> <p>00 <input type="radio"/> Aucun</p> <p>01 <input type="radio"/> Ecole Classique</p> <p>02 <input type="radio"/> Ecole Coranique</p> <p>03 <input type="radio"/> Alphabétisation</p> <p>99 <input type="radio"/> Ne sais pas</p>                                                                                                                                                           |
| <p>Niveau d'instruction</p> <p>E instruction==1</p>                       | <p>SINGLE-SELECT <span>niveauEducation</span></p> <p>00 <input type="radio"/> Aucun</p> <p>01 <input type="radio"/> Pre Scolaire</p> <p>02 <input type="radio"/> Primaire / Post Primaire</p> <p>03 <input type="radio"/> Secondaire</p> <p>04 <input type="radio"/> Supérieur</p> <p>05 <input type="radio"/> Technique</p> <p>06 <input type="radio"/> Centre de formation non formelle</p> <p>99 <input type="radio"/> Ne sais pas</p> |

|                      |                                                                                                                                                                                                                                                                                                                                                                                                                                                                                                                                                                                                                                                                                       |
|----------------------|---------------------------------------------------------------------------------------------------------------------------------------------------------------------------------------------------------------------------------------------------------------------------------------------------------------------------------------------------------------------------------------------------------------------------------------------------------------------------------------------------------------------------------------------------------------------------------------------------------------------------------------------------------------------------------------|
| Niveau d'instruction | <div>SINGLE-SELECT</div> <div>SCOPE: HIDDEN</div> <div>prevNiveauEducation</div> <div><div>00</div><div><div></div></div><div>Aucun</div></div> <div><div>01</div><div><div></div></div><div>Pre Scolaire</div></div> <div><div>02</div><div><div></div></div><div>Primaire / Post Primaire</div></div> <div><div>03</div><div><div></div></div><div>Secondaire</div></div> <div><div>04</div><div><div></div></div><div>Supérieur</div></div> <div><div>05</div><div><div></div></div><div>Technique</div></div> <div><div>06</div><div><div></div></div><div>Centre de formation non for<br/>melle</div></div> <div><div>99</div><div><div></div></div><div>Ne sais pas</div></div> |
|----------------------|---------------------------------------------------------------------------------------------------------------------------------------------------------------------------------------------------------------------------------------------------------------------------------------------------------------------------------------------------------------------------------------------------------------------------------------------------------------------------------------------------------------------------------------------------------------------------------------------------------------------------------------------------------------------------------------|

STATIC TEXT

E \$expectedPresent

*niveau anterieur: %prevNiveauEducation%*

Dernière classe frequenté

F niveauEducation==1 ? @optioncode.InRange(1,3) : niveauEducation==2 ? @optioncode.InRange(4,13) : niveauEducation==3 ? @optioncode.InRange(14,16) : niveauEducation==4 ? @optioncode.InRange(17,25) : niv  
[And 102 other symbols \[1\]](#)

E niveauEducation.InRange(1,6)

W1 classe >= prevClasse

M1 La dernière foi vous avez dit que avez fréquenté la classe %prevClasse % ???

|  |                                                                                                                                                                                                                                                                                                                                                                                                                                                                                                                                                                                                                                                                                                                                                                                                                                                                                                                                                                                                                                                            |
|--|------------------------------------------------------------------------------------------------------------------------------------------------------------------------------------------------------------------------------------------------------------------------------------------------------------------------------------------------------------------------------------------------------------------------------------------------------------------------------------------------------------------------------------------------------------------------------------------------------------------------------------------------------------------------------------------------------------------------------------------------------------------------------------------------------------------------------------------------------------------------------------------------------------------------------------------------------------------------------------------------------------------------------------------------------------|
|  | <div>SINGLE-SELECT</div> <div>classe</div> <div><div>01</div><div><div></div></div><div>PS1</div></div> <div><div>02</div><div><div></div></div><div>PS2</div></div> <div><div>03</div><div><div></div></div><div>PS3</div></div> <div><div>04</div><div><div></div></div><div>PR1</div></div> <div><div>05</div><div><div></div></div><div>PR2</div></div> <div><div>06</div><div><div></div></div><div>PR3</div></div> <div><div>07</div><div><div></div></div><div>PR4</div></div> <div><div>08</div><div><div></div></div><div>PR5</div></div> <div><div>09</div><div><div></div></div><div>PR6</div></div> <div><div>10</div><div><div></div></div><div>SE1</div></div> <div><div>11</div><div><div></div></div><div>SE2</div></div> <div><div>12</div><div><div></div></div><div>SE3</div></div> <div><div>13</div><div><div></div></div><div>SE4</div></div> <div><div>14</div><div><div></div></div><div>SE5</div></div> <div><div>15</div><div><div></div></div><div>SE6</div></div> <div><div>16</div><div><div></div></div><div>SE7</div></div> |
|--|------------------------------------------------------------------------------------------------------------------------------------------------------------------------------------------------------------------------------------------------------------------------------------------------------------------------------------------------------------------------------------------------------------------------------------------------------------------------------------------------------------------------------------------------------------------------------------------------------------------------------------------------------------------------------------------------------------------------------------------------------------------------------------------------------------------------------------------------------------------------------------------------------------------------------------------------------------------------------------------------------------------------------------------------------------|

Dernière classe fréquenté

F /\* niveauEducation==1 ? @optioncode.InRange(1,3) : niveauEducation=  
=2 ? @optioncode.InRange(4,13) : niveauEducation==3 ? @optioncode.I  
nRange(14,16) : niveauEducation==4 ? @optioncode.InRange(17,25) :  
[And 113 other symbols \[2\]](#)  
E niveauEducation.InRange(1,6)

SINGLE-SELECT

SCOPE: HIDDEN

prevClasse

01

☐

PS1

02

☐

PS2

03

☐

PS3

04

☐

PR1

05

☐

PR2

06

☐

PR3

07

☐

PR4

08

☐

PR5

09

☐

PR6

10

☐

SE1

11

☐

SE2

12

☐

SE3

13

☐

SE4

14

☐

SE5

15

☐

SE6

16

☐

SE7

[And 18 other symbols \[7\]](#)

STATIC TEXT

E \$expectedPresent  
*classe anterieur: %prevClasse%*

Avez-vous une occupation actuellement?

I Une activité qui rapporte de l'argent - durant les derniers 7 jours.  
E age >= 15

SINGLE-SELECT

statutOccupation

01

☐

Occupé

02

☐

Chômeurs

03

☐

En quête d'emploi

04

☐

Ménagère

05

☐

Etudiant / Elève

06

☐

Retraité

07

☐

Rentier

08

☐

Invalide

99

☐

Autre

Quelle autre statut d'occupation?

E statutOccupation==99

TEXT

statutOccupationAutre

|                                                                                                                                                                                                                                                                           |                                                                                                                                                                                                                                                                                                                                                                                                                                                                                                                                                                                                                                                                                                                                                                                                                                                  |
|---------------------------------------------------------------------------------------------------------------------------------------------------------------------------------------------------------------------------------------------------------------------------|--------------------------------------------------------------------------------------------------------------------------------------------------------------------------------------------------------------------------------------------------------------------------------------------------------------------------------------------------------------------------------------------------------------------------------------------------------------------------------------------------------------------------------------------------------------------------------------------------------------------------------------------------------------------------------------------------------------------------------------------------------------------------------------------------------------------------------------------------|
| <p>Occupation principale</p> <p>E age &gt; 14 &amp;&amp; !statutOccupation.InList(2,3,4,6,8)</p>                                                                                                                                                                          | <p>SINGLE-SELECT: COMBO BOX <span style="float: right;">occupation</span></p> <p>01 <input type="radio"/> Agriculture</p> <p>02 <input type="radio"/> Apiculture</p> <p>03 <input type="radio"/> Berger</p> <p>04 <input type="radio"/> Boucher</p> <p>05 <input type="radio"/> Cathéchiste</p> <p>06 <input type="radio"/> Chauffeur</p> <p>07 <input type="radio"/> Coiffeur</p> <p>08 <input type="radio"/> Commerce</p> <p>09 <input type="radio"/> Cordonnier</p> <p>10 <input type="radio"/> Cuisinier</p> <p>11 <input type="radio"/> Dolotière</p> <p>12 <input type="radio"/> Elève/Écolier/Étudiant</p> <p>13 <input type="radio"/> Elevage</p> <p>14 <input type="radio"/> Forgeron/ FGR=FOR</p> <p>15 <input type="radio"/> Fileuse</p> <p>16 <input type="radio"/> Fonc. public</p> <p><a href="#">And 59 other symbols [8]</a></p> |
| <p>Quelle autre occupation?</p> <p>E occupation==96</p>                                                                                                                                                                                                                   | <p>TEXT <span style="float: right;">occupation_o</span></p> <p>.....</p>                                                                                                                                                                                                                                                                                                                                                                                                                                                                                                                                                                                                                                                                                                                                                                         |
| <p>Comment a été l'état de santé de %membre% durant les 12 derniers mois ?</p> <p>I S'il a répondu bien: est ce que c'est très bon, bon ou plutôt moyen ? S'il a répondu mauvais: est ce que c'est très mauvais, mauvais ou plutôt moyen ?</p> <p>E \$expectedPresent</p> | <p>SINGLE-SELECT <span style="float: right;">etatSante</span></p> <p>01 <input type="radio"/> Très bon</p> <p>02 <input type="radio"/> Bon</p> <p>03 <input type="radio"/> Moyen</p> <p>04 <input type="radio"/> Mauvais</p> <p>05 <input type="radio"/> Très mauvais</p>                                                                                                                                                                                                                                                                                                                                                                                                                                                                                                                                                                        |
| <p>A %membre% une maladie chronique, c'est-à-dire une maladie qui dure depuis plus de trois mois ?</p> <p>E \$expectedPresent</p>                                                                                                                                         | <p>SINGLE-SELECT <span style="float: right;">maladieChronique</span></p> <p>01 <input type="radio"/> Oui</p> <p>02 <input type="radio"/> Non</p>                                                                                                                                                                                                                                                                                                                                                                                                                                                                                                                                                                                                                                                                                                 |
| <p>En dehors de cette (ces) maladie(s) chronique(s), a %membre% souffert d'une autre maladie dans le mois passé?</p> <p>E \$expectedPresent</p>                                                                                                                           | <p>SINGLE-SELECT <span style="float: right;">autreMaladie</span></p> <p>01 <input type="radio"/> Oui</p> <p>02 <input type="radio"/> Non</p>                                                                                                                                                                                                                                                                                                                                                                                                                                                                                                                                                                                                                                                                                                     |
| <p><u>Dans le mois passé</u>, a %membre% consulté dans un CSPS du district ou au CMA de Nouna?</p> <p>E \$expectedPresent</p>                                                                                                                                             | <p>SINGLE-SELECT <span style="float: right;">consulteCentre</span></p> <p>01 <input type="radio"/> Oui</p> <p>02 <input type="radio"/> Non</p>                                                                                                                                                                                                                                                                                                                                                                                                                                                                                                                                                                                                                                                                                                   |

|                                                                                                                                                  |                                                                                                                                                                                                                                                                                                                                   |
|--------------------------------------------------------------------------------------------------------------------------------------------------|-----------------------------------------------------------------------------------------------------------------------------------------------------------------------------------------------------------------------------------------------------------------------------------------------------------------------------------|
| Statut matrimoniale<br>E (sexe==2 && age>11)    (sexe==1 && age>14)                                                                              | SINGLE-SELECT <span style="float: right;">matrimon</span><br>01 <input type="radio"/> Célibataire<br>02 <input type="radio"/> Marié(e) Monogame<br>03 <input type="radio"/> Marié(e) Polygame<br>04 <input type="radio"/> Union Libre<br>05 <input type="radio"/> Divorcé(e) / Séparé(e)<br>06 <input type="radio"/> Veuf / Veuve |
| Voudriez-vous nous communiquer votre N° de Tel Personnel?<br>E age >= 10                                                                         | SINGLE-SELECT <span style="float: right;">givesPhone</span><br>001 <input type="radio"/> Oui<br>002 <input type="radio"/> Non<br>997 <input type="radio"/> Ne possède pas de téléphone                                                                                                                                            |
| Qu'est-ce que le n° de téléphone?<br>E givesPhone == 1                                                                                           | TEXT <span style="float: right;">phoneMembre</span><br>.....                                                                                                                                                                                                                                                                      |
| Consentirez-vous à ce que le CRSN vous appelle par téléphone ou via le tél. d'une personne du ménage pour des études de ce genre?<br>E age >= 10 | SINGLE-SELECT <span style="float: right;">consentPhone</span><br>01 <input type="radio"/> Oui<br>02 <input type="radio"/> Non                                                                                                                                                                                                     |
| Quel type de téléphone possède?<br>E age >= 10 && givesPhone!=997                                                                                | SINGLE-SELECT <span style="float: right;">typePhone</span><br>001 <input type="radio"/> Tel. Simple<br>002 <input type="radio"/> Smartphone<br>999 <input type="radio"/> Ne sait pas<br>996 <input type="radio"/> Refus                                                                                                           |
| STATIC TEXT<br>E typePhone==999<br><a href="#">Demander à voir le téléphone s'il est à coté</a>                                                  |                                                                                                                                                                                                                                                                                                                                   |
| Grossesse en cours<br>E sexe==2 && \$childbearingAge                                                                                             | SINGLE-SELECT <span style="float: right;">grossesse</span><br>01 <input type="radio"/> Oui<br>02 <input type="radio"/> Non<br>99 <input type="radio"/> NSP                                                                                                                                                                        |
| MEMBRES DU MÉNAGE / DÉTAILS<br>GROSSESSE %ROSTERTITLE%<br>E grossesse==1                                                                         |                                                                                                                                                                                                                                                                                                                                   |
| Nom du répondant<br>I (Si la personne n'est pas dans la liste, retournez à la [liste des membres](membres) e ajoutez cette personne!)            | SINGLE-SELECT: LINKED <span style="float: right;">repondantGrossesse</span><br>SOURCE OF CATEGORIES: ROSTER <a href="#">MEMBRE</a>                                                                                                                                                                                                |

|                                                                                                                                                                                                                                                                                                                                                                                                                                                                                                                                                                                                                                                                                                                                                         |                                                                                                                                                                                                                                                                                                                                                                                                                                                                                                                                                                                                       |
|---------------------------------------------------------------------------------------------------------------------------------------------------------------------------------------------------------------------------------------------------------------------------------------------------------------------------------------------------------------------------------------------------------------------------------------------------------------------------------------------------------------------------------------------------------------------------------------------------------------------------------------------------------------------------------------------------------------------------------------------------------|-------------------------------------------------------------------------------------------------------------------------------------------------------------------------------------------------------------------------------------------------------------------------------------------------------------------------------------------------------------------------------------------------------------------------------------------------------------------------------------------------------------------------------------------------------------------------------------------------------|
| <div>Combien de mois?</div> <div>E grossesse == 1</div> <div>V1 self.InRange(1,9)    self==--1</div> <div>M1 Doit être enceinte entre 1 et 9 mois!</div>                                                                                                                                                                                                                                                                                                                                                                                                                                                                                                                                                                                                | <div>NUMERIC: INTEGERpregnancyMonths</div> <div>-----</div> <div>SPECIAL VALUES</div> <div>-01Ne sait pas</div>                                                                                                                                                                                                                                                                                                                                                                                                                                                                                       |
| <div>Année début grossesse</div> <div>V1 self.InRange(dateEntree.Value.Year-1, dateEntree.Value.Year)    self==9999</div> <div>M1 L'année doit être cette année ou l'antérieur.</div>                                                                                                                                                                                                                                                                                                                                                                                                                                                                                                                                                                   | <div>NUMERIC: INTEGERanneeG</div> <div>-----</div> <div>SPECIAL VALUES</div> <div>9999Ne sait pas</div>                                                                                                                                                                                                                                                                                                                                                                                                                                                                                               |
| <div>Mois début grossesse</div> <div>E anneeN!=9999</div> <div>V1 pregnancyMonths==--1 ? true : minMonthsSinceDebut.InRange(pregnancyMonths-1, pregnancyMonths+1)</div> <div>M1 Ça fait %minMonthsSinceDebut% mois - mais vous avez dit qu'ils sont %pregnancyMonths% mois!</div> <div>V2 pregnancyMonths==--1 ? monthsSinceDebut &gt;= pregnancyMonths + 1 : true</div> <div>M2 Si c'était en %anneeG%, vous ne pouvez pas être enceinte %pregnancyMonths% mois!</div> <div>V3 pregnancyMonths==--1 ? minMonthsSinceDebut &lt;= 9 : true</div> <div>M3 Improbable! Vous serait enceinte du moins %minMonthsSinceDebut% mois maintenant!</div> <div>V4 self == 99 ? true : monthsSinceDebut &gt;= 0</div> <div>M4 Ne peut pas être dans l'avenir!</div> | <div>SINGLE-SELECTmoisG</div> <div>01<input type="radio"/> Janvier</div> <div>02<input type="radio"/> Février</div> <div>03<input type="radio"/> Mars</div> <div>04<input type="radio"/> Avril</div> <div>05<input type="radio"/> Mai</div> <div>06<input type="radio"/> Juin</div> <div>07<input type="radio"/> Juillet</div> <div>08<input type="radio"/> Août</div> <div>09<input type="radio"/> Septembre</div> <div>10<input type="radio"/> Octobre</div> <div>11<input type="radio"/> Novembre</div> <div>12<input type="radio"/> Décembre</div> <div>99<input type="radio"/> Ne sait pas</div> |
| <div>VARIABLE</div> <div>CenturyMonthCode(dateEntree.Value.Month, dateEntree.Value.Year) - CenturyMonthCode((moisG==99?1:(int) moisG), anneeG)</div>                                                                                                                                                                                                                                                                                                                                                                                                                                                                                                                                                                                                    | <div>LONGmonthsSinceDebut</div>                                                                                                                                                                                                                                                                                                                                                                                                                                                                                                                                                                       |
| <div>VARIABLE</div> <div>CenturyMonthCode(dateEntree.Value.Month, dateEntree.Value.Year) - CenturyMonthCode((moisG==99?12:(int) moisG), anneeG)</div>                                                                                                                                                                                                                                                                                                                                                                                                                                                                                                                                                                                                   | <div>LONGminMonthsSinceDebut</div>                                                                                                                                                                                                                                                                                                                                                                                                                                                                                                                                                                    |
| <div>Rang de la grossesse???</div> <div>V1 self.InRange(1,99)</div> <div>M1 Doit être entre 1 et 99.</div>                                                                                                                                                                                                                                                                                                                                                                                                                                                                                                                                                                                                                                              | <div>NUMERIC: INTEGERrangGrossesse</div> <div>-----</div>                                                                                                                                                                                                                                                                                                                                                                                                                                                                                                                                             |
| <div>Statut</div> <div>E false /* c'est grossesse en cours! */</div>                                                                                                                                                                                                                                                                                                                                                                                                                                                                                                                                                                                                                                                                                    | <div>SINGLE-SELECTstatutGrossesse</div> <div>01<input type="radio"/> Accouchement intervenu</div> <div>00<input type="radio"/> Pas encore</div>                                                                                                                                                                                                                                                                                                                                                                                                                                                       |
| <div>Date d'accouchement</div> <div>E statutGrossesse==1</div>                                                                                                                                                                                                                                                                                                                                                                                                                                                                                                                                                                                                                                                                                          | <div>DATEdateAccouchement</div> <div>-----</div>                                                                                                                                                                                                                                                                                                                                                                                                                                                                                                                                                      |
| <div>Months of previously reported Grossesse en cours</div>                                                                                                                                                                                                                                                                                                                                                                                                                                                                                                                                                                                                                                                                                             | <div>NUMERIC: INTEGERSCOPE: HIDDENopenPregnancy</div> <div>-----</div>                                                                                                                                                                                                                                                                                                                                                                                                                                                                                                                                |

|                                                                                                                                              |                                                                                                                    |
|----------------------------------------------------------------------------------------------------------------------------------------------|--------------------------------------------------------------------------------------------------------------------|
| <p>Depuis de %dateBasePretty% avez vous eu une ou plusieurs grossesses qui sont terminées?</p> <p>E sexe==2 &amp;&amp; \$childbearingAge</p> | <p>SINGLE-SELECT grossessesHistoriques</p> <p>01 <input type="radio"/> Oui</p> <p>02 <input type="radio"/> Non</p> |
| <p>Combien de grossesses?</p> <p>E grossessesHistoriques==1</p>                                                                              | <p>NUMERIC: INTEGER nombreGrossHist</p> <p>-----</p>                                                               |

MEMBRES DU MÉNAGE / DÉTAILS

## Roster: GROSSESSE

generated by numeric question [nombreGrossHist](#)

r\_issueGrossesse

MEMBRES DU MÉNAGE / DÉTAILS / GROSSESSE

## ISSUE GROSSESSE

STATIC TEXT

E @rowcode == 1 && IsAnswered(openPregnancy)

*%dateBasePretty% vous aviez une grossesse de %openPregnancy% mois.*

|                                                                |                                                                                                                                                                                               |
|----------------------------------------------------------------|-----------------------------------------------------------------------------------------------------------------------------------------------------------------------------------------------|
| <p>Quelle était la issue de la grossesse?</p>                  | <p>SINGLE-SELECT issueGrossesse</p> <p>01 <input type="radio"/> Accouchement</p> <p>02 <input type="radio"/> Avortement</p> <p>03 <input type="radio"/> Mort-Né</p>                           |
| <p>Date de l'issue de la grossesse</p>                         | <p>DATE dateIssue</p> <p>-----</p>                                                                                                                                                            |
| <p>C'était sa première grossesse?</p>                          | <p>SINGLE-SELECT premiereGrossesse</p> <p>01 <input type="radio"/> Oui</p> <p>02 <input type="radio"/> Non</p>                                                                                |
| <p>%membre% a survie?</p>                                      | <p>SINGLE-SELECT mereSurvie</p> <p>01 <input type="radio"/> Oui</p> <p>02 <input type="radio"/> Non</p>                                                                                       |
| <p>L'enfant a survie?</p>                                      | <p>SINGLE-SELECT enfantSurvie</p> <p>01 <input type="radio"/> Oui</p> <p>02 <input type="radio"/> Non</p>                                                                                     |
| <p>Type d'accouchement</p> <p>E issueGrossesse.InList(1,3)</p> | <p>SINGLE-SELECT typeAccouchement</p> <p>01 <input type="radio"/> Voie basse</p> <p>02 <input type="radio"/> Césarienne</p>                                                                   |
| <p>Type d'avortement</p> <p>E issueGrossesse==2</p>            | <p>SINGLE-SELECT typeAvortement</p> <p>01 <input type="radio"/> spontané</p> <p>02 <input type="radio"/> provoqué</p> <p>03 <input type="radio"/> ne sait pas / ne veut pas rep<br/>ondre</p> |

|                                                                        |                                                                                                                                                                                                                                                                                                                                                                                                                             |
|------------------------------------------------------------------------|-----------------------------------------------------------------------------------------------------------------------------------------------------------------------------------------------------------------------------------------------------------------------------------------------------------------------------------------------------------------------------------------------------------------------------|
| Lieu                                                                   | <div>SINGLE-SELECT</div> <div>lieuAccouchement</div> <div><div>01</div><div><input type="radio"/></div><div>F. Sanitaire</div></div> <div><div>02</div><div><input type="radio"/></div><div>Acc. Villagoise</div></div> <div><div>03</div><div><input type="radio"/></div><div>Domicile / Route</div></div>                                                                                                                 |
| <div>Quel type de F. Sanitaire?</div> <div>E lieuAccouchement==1</div> | <div>SINGLE-SELECT</div> <div>typeFsanitaire</div> <div><div>01</div><div><input type="radio"/></div><div>CSPS</div></div> <div><div>02</div><div><input type="radio"/></div><div>CM</div></div> <div><div>03</div><div><input type="radio"/></div><div>CMA</div></div> <div><div>04</div><div><input type="radio"/></div><div>Hôpital</div></div> <div><div>99</div><div><input type="radio"/></div><div>Autre</div></div> |

MEMBRES DU MÉNAGE / DÉTAILS / GROSSESSE / ISSUE GROSSESSE

%LIEUACCOUCHEMENT%

E IsAnswered(lieuAccouchement)

|                                                                                                     |                                                                                                                                                                                                                                                                                                                                                                                                                                                                                                                                                                                                                                                                                                                                                                                                                                                                                                                                                                                                                                                                                                                                                                                                                                                                                                                                                             |
|-----------------------------------------------------------------------------------------------------|-------------------------------------------------------------------------------------------------------------------------------------------------------------------------------------------------------------------------------------------------------------------------------------------------------------------------------------------------------------------------------------------------------------------------------------------------------------------------------------------------------------------------------------------------------------------------------------------------------------------------------------------------------------------------------------------------------------------------------------------------------------------------------------------------------------------------------------------------------------------------------------------------------------------------------------------------------------------------------------------------------------------------------------------------------------------------------------------------------------------------------------------------------------------------------------------------------------------------------------------------------------------------------------------------------------------------------------------------------------|
| <div>A quel village?</div> <div>I Tapez partie du nom du village, et sélectionnez de la liste</div> | <div>SINGLE-SELECT: COMBO BOX</div> <div>villAccouchement</div> <div><div>02</div><div><input type="radio"/></div><div>Toni</div></div> <div><div>05</div><div><input type="radio"/></div><div>Boron</div></div> <div><div>08</div><div><input type="radio"/></div><div>Cissé</div></div> <div><div>09</div><div><input type="radio"/></div><div>Dankoumana</div></div> <div><div>10</div><div><input type="radio"/></div><div>Dembeléla</div></div> <div><div>11</div><div><input type="radio"/></div><div>Denissa</div></div> <div><div>12</div><div><input type="radio"/></div><div>Denissa Mossi</div></div> <div><div>14</div><div><input type="radio"/></div><div>Dionkongo</div></div> <div><div>15</div><div><input type="radio"/></div><div>Dina</div></div> <div><div>16</div><div><input type="radio"/></div><div>Dokoura</div></div> <div><div>17</div><div><input type="radio"/></div><div>Goni</div></div> <div><div>18</div><div><input type="radio"/></div><div>Kamadena</div></div> <div><div>19</div><div><input type="radio"/></div><div>Kèmena</div></div> <div><div>21</div><div><input type="radio"/></div><div>Koro</div></div> <div><div>23</div><div><input type="radio"/></div><div>Leï</div></div> <div><div>27</div><div><input type="radio"/></div><div>Oueté</div></div> <div><a href="#">And 43 other symbols [10]</a></div> |
|-----------------------------------------------------------------------------------------------------|-------------------------------------------------------------------------------------------------------------------------------------------------------------------------------------------------------------------------------------------------------------------------------------------------------------------------------------------------------------------------------------------------------------------------------------------------------------------------------------------------------------------------------------------------------------------------------------------------------------------------------------------------------------------------------------------------------------------------------------------------------------------------------------------------------------------------------------------------------------------------------------------------------------------------------------------------------------------------------------------------------------------------------------------------------------------------------------------------------------------------------------------------------------------------------------------------------------------------------------------------------------------------------------------------------------------------------------------------------------|

|                                                                                                                                                                                                                       |                                          |
|-----------------------------------------------------------------------------------------------------------------------------------------------------------------------------------------------------------------------|------------------------------------------|
| <div>VARIABLE</div> <div>(CenturyMonthCode(dateEntree.Value.Month, dateEntree.Value.Year) - CenturyMonthCode(dateBase.Value.Month, dateBase.Value.Year) - ((dateEntree.Value.Day &lt; dateBase.Value.Day)?1:0))</div> | <div>LONG</div> <div>timeSinceLast</div> |
|-----------------------------------------------------------------------------------------------------------------------------------------------------------------------------------------------------------------------|------------------------------------------|

STATIC TEXT

E false

*time since last census %timeSinceLast% months*

MEMBRES DU MÉNAGE / DÉTAILS

NOUVEAU-NÉ %MEMBRE%

E /\* only if born after previous census \*/ ageInMonths1 <= (CenturyMonthCode(dateEntree.value.Month, dateEntree.value

|                                                                                                                                                                                                                                              |                                                                                                                                                                                                                                                                                         |
|----------------------------------------------------------------------------------------------------------------------------------------------------------------------------------------------------------------------------------------------|-----------------------------------------------------------------------------------------------------------------------------------------------------------------------------------------------------------------------------------------------------------------------------------------|
| <div>Nom du répondant</div> <div>I (Si la personne n'est pas dans la liste, retournez a la [liste des membres](membres) e ajoutez cette personne!)</div>                                                                                     | <div>SINGLE-SELECT: LINKED<div>SOURCE OF CATEGORIES: ROSTER <a href="#">MEMBRE</a></div></div> <div>repondantNaissance</div>                                                                                                                                                            |
| <div>Qui est la mère de %membre%</div> <div>F sexe==2 &amp;&amp; age &gt;= 9 &amp;&amp; (age &gt; @current.age + 9)</div> <div>E mereDansMenage == 1</div>                                                                                   | <div>SINGLE-SELECT: LINKED<div>SOURCE OF CATEGORIES: ROSTER <a href="#">MEMBRE</a></div></div> <div>mereDuNouveauNe</div>                                                                                                                                                               |
| <div>Prenom de la mère de %rosteritle%</div> <div>E mereDansMenage == 2</div>                                                                                                                                                                | <div>TEXT</div> <div>prenomMere</div> <div></div>                                                                                                                                                                                                                                       |
| <div>Nom de la mère de %rosteritle%</div> <div>E mereDansMenage == 2</div>                                                                                                                                                                   | <div>TEXT</div> <div>nomMere</div> <div></div>                                                                                                                                                                                                                                          |
| <div>Est-ce la première naissance vivante de %mereDuNouveauNe%?</div>                                                                                                                                                                        | <div>SINGLE-SELECT</div> <div>premiereNaissance</div> <div>01 <input type="radio"/> Oui</div> <div>02 <input type="radio"/> Non</div>                                                                                                                                                   |
| <div>Rang de naissance</div> <div>E premiereNaissance==2</div>                                                                                                                                                                               | <div>NUMERIC: INTEGER</div> <div>rangNaissance</div> <div></div>                                                                                                                                                                                                                        |
| <div>Accouchement Multiple?</div>                                                                                                                                                                                                            | <div>SINGLE-SELECT</div> <div>accouchementMultiple</div> <div>01 <input type="radio"/> Oui</div> <div>02 <input type="radio"/> Non</div>                                                                                                                                                |
| <div>Combien d'enfants sont nés à cette occasion?</div> <div>E accouchementMultiple==1</div> <div>W1 self &lt; 6</div> <div>M1 %enfantsMultiples% enfants sont nés ensembles ?!</div>                                                        | <div>NUMERIC: INTEGER</div> <div>enfantsMultiples</div> <div></div>                                                                                                                                                                                                                     |
| <div>Combien de naissances vivantes %mereDuNouveauNe% a eu, y compris celle-ci ?</div> <div>E premiereNaissance==2</div> <div>W1 self &lt;= 15</div> <div>M1 Vous êtes sûr que vous avez eu %naissancesVivantes% naissances vivantes?!</div> | <div>NUMERIC: INTEGER</div> <div>naissancesVivantes</div> <div></div>                                                                                                                                                                                                                   |
| <div>Lieu de la naissance</div>                                                                                                                                                                                                              | <div>SINGLE-SELECT</div> <div>lieuNaissance</div> <div>01 <input type="radio"/> Domicile</div> <div>02 <input type="radio"/> Accoucheuses villageoises</div> <div>03 <input type="radio"/> CSPS</div> <div>04 <input type="radio"/> CMA</div> <div>99 <input type="radio"/> Autre</div> |
| <div>Quel autre lieu?</div> <div>E lieuNaissance==99</div>                                                                                                                                                                                   | <div>TEXT</div> <div>autreLieuNaissance</div> <div></div>                                                                                                                                                                                                                               |
| <div>Le père de %membre% vit dans le ménage?</div>                                                                                                                                                                                           | <div>SINGLE-SELECT</div> <div>pereDansMenage</div> <div>01 <input type="radio"/> Oui</div> <div>02 <input type="radio"/> Non</div>                                                                                                                                                      |

|                                                                                                                                                           |                                                                                                                                                                                                                                                                                                                                                                                                                                                                                                                                                                                                                                                                                                                                                                                                                                          |
|-----------------------------------------------------------------------------------------------------------------------------------------------------------|------------------------------------------------------------------------------------------------------------------------------------------------------------------------------------------------------------------------------------------------------------------------------------------------------------------------------------------------------------------------------------------------------------------------------------------------------------------------------------------------------------------------------------------------------------------------------------------------------------------------------------------------------------------------------------------------------------------------------------------------------------------------------------------------------------------------------------------|
| <div>Qui est le père de %membre%?</div> <div>F sexe==1 &amp;&amp; age &gt;= 9 &amp;&amp; (age &gt; @current.age + 9)</div> <div>E pereDansMenage==1</div> | <div>SINGLE-SELECT: LINKED</div> <div>SOURCE OF CATEGORIES: ROSTER <a href="#">MEMBRE</a></div> <div>pereDuNouveauNe</div>                                                                                                                                                                                                                                                                                                                                                                                                                                                                                                                                                                                                                                                                                                               |
| <div>Prénom du père</div> <div>E pereDansMenage==2</div>                                                                                                  | <div>TEXT</div> <div>prenomPere</div> <div></div>                                                                                                                                                                                                                                                                                                                                                                                                                                                                                                                                                                                                                                                                                                                                                                                        |
| <div>Nom du père</div> <div>E pereDansMenage==2</div>                                                                                                     | <div>TEXT</div> <div>nomPere</div> <div></div>                                                                                                                                                                                                                                                                                                                                                                                                                                                                                                                                                                                                                                                                                                                                                                                           |
| <div>Ou reside le père?</div> <div>E pereDansMenage==2</div>                                                                                              | <div>SINGLE-SELECT</div> <div>residPere</div> <div>01 <input type="radio"/> Intérieur SSDS</div> <div>02 <input type="radio"/> Au Burkina Faso</div> <div>03 <input type="radio"/> Hors Burkina Faso</div>                                                                                                                                                                                                                                                                                                                                                                                                                                                                                                                                                                                                                               |
| <div>A quel village?</div> <div>I Tapez partie du nom du village, et sélectionnez de la liste</div> <div>E residPere==1</div>                             | <div>SINGLE-SELECT: COMBO BOX</div> <div>residPerevill</div> <div>02 <input type="radio"/> Toni</div> <div>05 <input type="radio"/> Boron</div> <div>08 <input type="radio"/> Cissé</div> <div>09 <input type="radio"/> Dankoumana</div> <div>10 <input type="radio"/> Dembeléla</div> <div>11 <input type="radio"/> Denissa</div> <div>12 <input type="radio"/> Denissa Mossi</div> <div>14 <input type="radio"/> Dionkongo</div> <div>15 <input type="radio"/> Dina</div> <div>16 <input type="radio"/> Dokoura</div> <div>17 <input type="radio"/> Goni</div> <div>18 <input type="radio"/> Kamadena</div> <div>19 <input type="radio"/> Kèmena</div> <div>21 <input type="radio"/> Koro</div> <div>23 <input type="radio"/> Leï</div> <div>27 <input type="radio"/> Ouetté</div> <div><a href="#">And 43 other symbols [9]</a></div> |

|                                                                                                                                                                        |                                                                                                                                                                                                                                                                                                                                                                                                                                                                                                                                                                                                                                                                                                                                                                                                                                                                                                                                                                                                                                                                                                                                                                                                                                                                                                                                                                                                                                                                                                                                                                                                                                                                                                                                                                                                                                                                                                                                                                                                              |
|------------------------------------------------------------------------------------------------------------------------------------------------------------------------|--------------------------------------------------------------------------------------------------------------------------------------------------------------------------------------------------------------------------------------------------------------------------------------------------------------------------------------------------------------------------------------------------------------------------------------------------------------------------------------------------------------------------------------------------------------------------------------------------------------------------------------------------------------------------------------------------------------------------------------------------------------------------------------------------------------------------------------------------------------------------------------------------------------------------------------------------------------------------------------------------------------------------------------------------------------------------------------------------------------------------------------------------------------------------------------------------------------------------------------------------------------------------------------------------------------------------------------------------------------------------------------------------------------------------------------------------------------------------------------------------------------------------------------------------------------------------------------------------------------------------------------------------------------------------------------------------------------------------------------------------------------------------------------------------------------------------------------------------------------------------------------------------------------------------------------------------------------------------------------------------------------|
| <p><b>A quel lieu?</b></p> <p>F (@optioncode&lt;=4    @optioncode==99) &amp;&amp; residPere==2    @optioncode&gt;4 &amp;&amp; residPere==3</p> <p>E residPere&gt;1</p> | <p style="text-align: right;">SINGLE-SELECT <span style="float: right;">residPereHorssDSS</span></p> <div style="display: flex; align-items: center;"> <div style="width: 40px; text-align: right;">01</div> <div><input type="radio"/> Ouaga</div> </div> <div style="display: flex; align-items: center;"> <div style="width: 40px; text-align: right;">02</div> <div><input type="radio"/> Bobo</div> </div> <div style="display: flex; align-items: center;"> <div style="width: 40px; text-align: right;">03</div> <div><input type="radio"/> Dedougou</div> </div> <div style="display: flex; align-items: center;"> <div style="width: 40px; text-align: right;">04</div> <div><input type="radio"/> Nouna</div> </div> <div style="display: flex; align-items: center;"> <div style="width: 40px; text-align: right;">05</div> <div><input type="radio"/> Côte d'Ivoire</div> </div> <div style="display: flex; align-items: center;"> <div style="width: 40px; text-align: right;">06</div> <div><input type="radio"/> Mali</div> </div> <div style="display: flex; align-items: center;"> <div style="width: 40px; text-align: right;">07</div> <div><input type="radio"/> Autre lieu en Afrique</div> </div> <div style="display: flex; align-items: center;"> <div style="width: 40px; text-align: right;">08</div> <div><input type="radio"/> Amerique</div> </div> <div style="display: flex; align-items: center;"> <div style="width: 40px; text-align: right;">09</div> <div><input type="radio"/> Asie</div> </div> <div style="display: flex; align-items: center;"> <div style="width: 40px; text-align: right;">10</div> <div><input type="radio"/> Europe</div> </div> <div style="display: flex; align-items: center;"> <div style="width: 40px; text-align: right;">11</div> <div><input type="radio"/> Australie</div> </div> <div style="display: flex; align-items: center;"> <div style="width: 40px; text-align: right;">99</div> <div><input type="radio"/> Autre</div> </div> |
| <p><b>Nom du chef de ménage du père</b></p> <p>E residPere==1</p>                                                                                                      | <p style="text-align: right;">TEXT <span style="float: right;">pereNomCHM</span></p> <div style="border-bottom: 1px solid black; height: 1.2em; width: 100%;"></div>                                                                                                                                                                                                                                                                                                                                                                                                                                                                                                                                                                                                                                                                                                                                                                                                                                                                                                                                                                                                                                                                                                                                                                                                                                                                                                                                                                                                                                                                                                                                                                                                                                                                                                                                                                                                                                         |
| <p><b>Est-ce que %membre% possède une moustiquaire?</b></p> <p>E \$expectedPresent</p>                                                                                 | <p style="text-align: right;">SINGLE-SELECT <span style="float: right;">moustiquaire</span></p> <div style="display: flex; align-items: center;"> <div style="width: 40px; text-align: right;">01</div> <div><input type="radio"/> Non</div> </div> <div style="display: flex; align-items: center;"> <div style="width: 40px; text-align: right;">02</div> <div><input type="radio"/> Oui, moustiquaire non imprégnée</div> </div> <div style="display: flex; align-items: center;"> <div style="width: 40px; text-align: right;">03</div> <div><input type="radio"/> Oui, moustiquaire imprégnée d'insecticide</div> </div> <div style="display: flex; align-items: center;"> <div style="width: 40px; text-align: right;">04</div> <div><input type="radio"/> Oui, je ne sais pas</div> </div>                                                                                                                                                                                                                                                                                                                                                                                                                                                                                                                                                                                                                                                                                                                                                                                                                                                                                                                                                                                                                                                                                                                                                                                                            |
| <p><b>%membre% a dormi sous moustiquaire la nuit dernière?</b></p> <p>E \$expectedPresent</p>                                                                          | <p style="text-align: right;">SINGLE-SELECT <span style="float: right;">dormi_moustiq</span></p> <div style="display: flex; align-items: center;"> <div style="width: 40px; text-align: right;">01</div> <div><input type="radio"/> Non</div> </div> <div style="display: flex; align-items: center;"> <div style="width: 40px; text-align: right;">02</div> <div><input type="radio"/> Oui, moustiquaire non imprégnée</div> </div> <div style="display: flex; align-items: center;"> <div style="width: 40px; text-align: right;">03</div> <div><input type="radio"/> Oui, moustiquaire imprégnée d'insecticide</div> </div> <div style="display: flex; align-items: center;"> <div style="width: 40px; text-align: right;">04</div> <div><input type="radio"/> Oui, je ne sais pas</div> </div>                                                                                                                                                                                                                                                                                                                                                                                                                                                                                                                                                                                                                                                                                                                                                                                                                                                                                                                                                                                                                                                                                                                                                                                                           |
| <p>VARIABLE</p> <p>membre.Count(x =&gt; x.ageInMonths1&lt;60)</p>                                                                                                      | <p style="text-align: right;">LONG <span style="float: right;">NumChildren_under_5</span></p>                                                                                                                                                                                                                                                                                                                                                                                                                                                                                                                                                                                                                                                                                                                                                                                                                                                                                                                                                                                                                                                                                                                                                                                                                                                                                                                                                                                                                                                                                                                                                                                                                                                                                                                                                                                                                                                                                                                |

MEMBRES DU MÉNAGE

**NOTE**

E (NumChildren\_under\_5 == 0) && \$P1P2

---

STATIC TEXT

E \$P1P2 & NumChildren\_under\_5 == 0

*Il n y a pas des enfants moins de 5 années!*  
*Fermez cette interview et choisissez une*  
**MÉNAGE DE REMPLACEMENT !**

MEMBRES DU MÉNAGE

## Roster: MÈRE DE - %ROSTERTITLE%

generated by list question [membres](#)

child

E (mereDansMenage==1 && !IsAnswered(mereDuNouveauNe)) || (mereDansMenage==2 && ageInMonths1<60)

|                                                                                                                                                                                                                                        |                                                                                                         |
|----------------------------------------------------------------------------------------------------------------------------------------------------------------------------------------------------------------------------------------|---------------------------------------------------------------------------------------------------------|
| <p>Qui est la mère de %membre%?</p> <p>I (Si la personne n'est pas dans la liste, retournez a la [liste des membres](membres) e ajoutez cette personne!)</p> <p>F sexe==2 &amp;&amp; age &gt;= 12</p> <p>E mereDansMenage == 1</p>     | <p>SINGLE-SELECT: LINKED</p> <p>SOURCE OF CATEGORIES: ROSTER <a href="#">MEMBRE</a></p> <p>mere</p>     |
| <p>VARIABLE</p> <p>mere[0]</p>                                                                                                                                                                                                         | <p>LONG</p> <p>motherid</p>                                                                             |
| <p>Qui s'occupe de %membre%?</p> <p>I (Si la personne n'est pas dans la liste, retournez a la [liste des membres](membres) e ajoutez cette personne!)</p> <p>F age&gt;=12</p> <p>E mereDansMenage==2 &amp;&amp; ageInMonths1&lt;60</p> | <p>SINGLE-SELECT: LINKED</p> <p>SOURCE OF CATEGORIES: ROSTER <a href="#">MEMBRE</a></p> <p>guardian</p> |
| <p>VARIABLE</p> <p>guardian[0]</p>                                                                                                                                                                                                     | <p>LONG</p> <p>guardianid</p>                                                                           |
| <p>STATIC TEXT</p> <p>E false</p> <p><i>mother: %motherid% - guardian: %guardianid%</i></p>                                                                                                                                            |                                                                                                         |

## MEMBRES DU MÉNAGE

### Roster: (-- COMMENTED --) ENFANT

generated by list question [membres](#)

R\_child

E age.InRange(0,4) && false

|                                                                                                                     |                                                                                                                         |
|---------------------------------------------------------------------------------------------------------------------|-------------------------------------------------------------------------------------------------------------------------|
| <p>Est-ce que %R_child% %nom% a un surnom?</p>                                                                      | <p>SINGLE-SELECT</p> <p>01 <input type="radio"/> Oui</p> <p>02 <input type="radio"/> Non</p> <p>existschildNickname</p> |
| <p>Quel est le surnom de %R_child%?</p> <p>E existschildNickname==1</p>                                             | <p>TEXT</p> <p>childNickname</p> <p>.....</p>                                                                           |
| <p>VARIABLE</p> <p>dateEntree.Value.Day - ddn.Value.Day</p>                                                         | <p>LONG</p> <p>deltaDays</p>                                                                                            |
| <p>VARIABLE</p> <p>(deltaDays&lt;0)?ageInMonths1 -1:ageInMonths1</p>                                                | <p>LONG</p> <p>adjusted</p>                                                                                             |
| <p>STATIC TEXT</p> <p>E false</p> <p><i>Age in completed months: %ageInMonths1%</i></p>                             |                                                                                                                         |
| <p>STATIC TEXT</p> <p>E !\$treatmentAge &amp;&amp; !\$newBorn</p> <p><i>%R_child% is not under 5 years old!</i></p> |                                                                                                                         |

|                                                                                                                                                        |                                                                                                                                                                                                                                                                                                                                                                                                          |
|--------------------------------------------------------------------------------------------------------------------------------------------------------|----------------------------------------------------------------------------------------------------------------------------------------------------------------------------------------------------------------------------------------------------------------------------------------------------------------------------------------------------------------------------------------------------------|
| <p>Comment avez vous validé la date de naissance de %R_child%?</p> <p>E (\$treatmentAge    \$newBorn) &amp;&amp; false</p>                             | <p>SINGLE-SELECT <span>dobSource</span></p> <p>01 <input type="radio"/> Avec le carnet de santé</p> <p>02 <input type="radio"/> Avec le certificat de naissanc<br/>e</p> <p>03 <input type="radio"/> Quelqu'un m'a dit</p> <p>04 <input type="radio"/> Avec un autre document</p>                                                                                                                        |
| <p>Qui vous a renseigné?</p> <p>E dobSource==3</p>                                                                                                     | <p>TEXT <span>dobSourcewho</span></p> <p>.....</p>                                                                                                                                                                                                                                                                                                                                                       |
| <p>Quel autre document?</p> <p>E dobSource==4</p>                                                                                                      | <p>TEXT <span>dobSourceother</span></p> <p>.....</p>                                                                                                                                                                                                                                                                                                                                                     |
| <p>What is %R_child%'s vital status?</p> <p>E (\$treatmentAge    \$newBorn) &amp;&amp; false</p>                                                       | <p>SINGLE-SELECT <span>childvital</span></p> <p>01 <input type="radio"/> Alive - slept in the house last<br/>night</p> <p>02 <input type="radio"/> Alive - but temporarily abse<br/>nt</p> <p>03 <input type="radio"/> Dead</p> <p>04 <input type="radio"/> Moved within the communit<br/>y</p> <p>05 <input type="radio"/> Moved outside the commun<br/>ity</p> <p>06 <input type="radio"/> Unknown</p> |
| <p>When did %R_child% die?</p> <p>E childvital == 3</p>                                                                                                | <p>DATE <span>whenDied</span></p> <p>.....</p>                                                                                                                                                                                                                                                                                                                                                           |
| <p>Where did %R_child% live when %R_child% died<br/>?</p> <p>E childvital == 3</p>                                                                     | <p>TEXT <span>whereDied</span></p> <p>.....</p>                                                                                                                                                                                                                                                                                                                                                          |
| <p>What is the name of the household head wher<br/>e %R_child% moved to?</p> <p>I First and Last name of new household head</p> <p>E childvital==4</p> | <p>TEXT <span>movedToHoH</span></p> <p>.....</p>                                                                                                                                                                                                                                                                                                                                                         |
| <p>Which community did %R_child% move to?</p> <p>E childvital==5</p>                                                                                   | <p>TEXT <span>movedToCommunity</span></p> <p>.....</p>                                                                                                                                                                                                                                                                                                                                                   |

# NUTRITION

E \$OK && \$P1P2

NUTRITION  
Roster: ENFANT  
generated by list question [membres](#)

[detailenfant](#)

E ageInMonths1<60

|                                                                                                  |                                                                                                                                                                                                                        |      |
|--------------------------------------------------------------------------------------------------|------------------------------------------------------------------------------------------------------------------------------------------------------------------------------------------------------------------------|------|
| Est-ce que l'enfant %detailenfant% est présent lors de l'enquête ?                               | <div>SINGLE-SELECT</div> <div>01 <input type="radio"/> Oui</div> <div>00 <input type="radio"/> Non</div>                                                                                                               | QN02 |
| STATIC TEXT                                                                                      |                                                                                                                                                                                                                        |      |
| Âge de %detailenfant% est: %ageInMonths1% mois                                                   |                                                                                                                                                                                                                        |      |
| Observez. : L'enfant %detailenfant% a-t-il un ventre gonflé aujourd'hui?                         | <div>SINGLE-SELECT</div> <div>01 <input type="radio"/> Oui</div> <div>00 <input type="radio"/> Non</div>                                                                                                               | QN06 |
| L'enfant %detailenfant% a-t-il eu de la fièvre au cours des 4 dernières semaines ?               | <div>SINGLE-SELECT</div> <div>01 <input type="radio"/> Oui</div> <div>00 <input type="radio"/> Non</div>                                                                                                               | QN07 |
| L'enfant %detailenfant% a-t-il eu la diarrhée au cours des 4 dernières semaines ?                | <div>SINGLE-SELECT</div> <div>01 <input type="radio"/> Oui</div> <div>00 <input type="radio"/> Non</div>                                                                                                               | QN08 |
| Observez: %detailenfant% l'enfant a-t-il un gonflement des jambes ou des bras ? (faites un test) | <div>SINGLE-SELECT</div> <div>01 <input type="radio"/> Oui</div> <div>00 <input type="radio"/> Non</div>                                                                                                               | QN09 |
| L'enfant %detailenfant% a des signes de kwashiorkor ou marasmes ?                                | <div>SINGLE-SELECT</div> <div>01 <input type="radio"/> Oui</div> <div>00 <input type="radio"/> Non</div>                                                                                                               | QN10 |
| Avait-elle eu des complications pendant la grossesse ou l'accouchement de %detailenfant% ?       | <div>SINGLE-SELECT</div> <div>01 <input type="radio"/> Oui</div> <div>00 <input type="radio"/> Non</div>                                                                                                               | QN24 |
| A quel âge de la grossesse (en mois) y a t il eut ces complications ?                            | <div>SINGLE-SELECT</div> <div>01 <input type="radio"/> &lt; 7 moins</div> <div>02 <input type="radio"/> 7-8 moins</div> <div>03 <input type="radio"/> 8-9 moins</div> <div>04 <input type="radio"/> &gt; 9 moins</div> | QN25 |
| %detailenfant% Avait - il /elle eut d'autres maladies les deux (2) dernières semaines ?          | <div>SINGLE-SELECT</div> <div>01 <input type="radio"/> Oui</div> <div>00 <input type="radio"/> Non</div>                                                                                                               | QN11 |

E QN24==1

E false

|                                                                                                                                                                             |                                                                                                                                                                                                                                                |
|-----------------------------------------------------------------------------------------------------------------------------------------------------------------------------|------------------------------------------------------------------------------------------------------------------------------------------------------------------------------------------------------------------------------------------------|
| <p>Enfant issu d'accouchement unique ou multiple (gémellité) ?</p>                                                                                                          | <p>SINGLE-SELECT QN28</p> <p>01 <input type="radio"/> Unique</p> <p>02 <input type="radio"/> jumeaux</p>                                                                                                                                       |
| <p>Durée de grossesse (en mois) jusqu'à la naissance de %detailenfant%</p> <p>V1 QN29&lt;=11</p> <p>M1 La durée de la grossesse doit être inférieure ou égale à 11 mois</p> | <p>NUMERIC: INTEGER QN29</p> <p>-----</p>                                                                                                                                                                                                      |
| <p>Est-ce que la mère/tutrice de l'enfant %detailenfant% est présente lors de l'enquête ?</p>                                                                               | <p>SINGLE-SELECT QN13</p> <p>01 <input type="radio"/> Oui</p> <p>00 <input type="radio"/> Non</p>                                                                                                                                              |
| <p>La mère de %detailenfant% est vivante ?</p> <p>E QN13==0</p>                                                                                                             | <p>SINGLE-SELECT QN14A</p> <p>01 <input type="radio"/> Oui</p> <p>00 <input type="radio"/> Non</p>                                                                                                                                             |
| <p>Le père de %detailenfant% est vivant ?</p>                                                                                                                               | <p>SINGLE-SELECT QN14B</p> <p>01 <input type="radio"/> Oui</p> <p>00 <input type="radio"/> Non</p>                                                                                                                                             |
| <p>Est-ce que la mère / tutrice de %detailenfant% travaille aux champs ?</p> <p>E false</p>                                                                                 | <p>SINGLE-SELECT QN22A</p> <p>01 <input type="radio"/> Oui</p> <p>00 <input type="radio"/> Non</p>                                                                                                                                             |
| <p>Si oui, préciser (Plusieurs réponses possibles)</p> <p>E QN22A==1</p>                                                                                                    | <p>MULTI-SELECT QN22B</p> <p>01 <input type="checkbox"/> Préparer/Défricher le champ</p> <p>02 <input type="checkbox"/> semer</p> <p>03 <input type="checkbox"/> cultiver (enlever les herbes)</p> <p>04 <input type="checkbox"/> récolter</p> |
| <p>Est-ce qu'elle emmène l'enfant aux champs ?</p> <p>E QN22A==1</p>                                                                                                        | <p>SINGLE-SELECT QN23</p> <p>01 <input type="radio"/> Jamais</p> <p>02 <input type="radio"/> Rarement</p> <p>03 <input type="radio"/> Parfois</p> <p>04 <input type="radio"/> Souvent</p>                                                      |
| <p>La mère/tutrice a-t-elle donné le premier lait (colostrum) %detailenfant% juste après la naissance ?</p>                                                                 | <p>SINGLE-SELECT QN26</p> <p>01 <input type="radio"/> Oui</p> <p>00 <input type="radio"/> Non</p>                                                                                                                                              |
| <p>La mère/tutrice de %detailenfant% a-t-elle commencé à lui donner des aliments solides?</p>                                                                               | <p>SINGLE-SELECT aliment_yes_no</p> <p>01 <input type="radio"/> Oui</p> <p>00 <input type="radio"/> Non</p>                                                                                                                                    |

|                                                                                                                                                                                                                                                        |                                                                                                                                                                               |
|--------------------------------------------------------------------------------------------------------------------------------------------------------------------------------------------------------------------------------------------------------|-------------------------------------------------------------------------------------------------------------------------------------------------------------------------------|
| <p>À quel âge (en mois) de %detailenfant% la mère /tutrice a-t-elle introduit la bouillie ?</p> <p>I âge de l'enfant (en mois)</p> <p>V1 QN27&lt;=ageInMonths1</p> <p>M1 le nombre de mois doit etre inferieur ou egal a l'age en mois de l'enfant</p> | <p>NUMERIC: INTEGER QN27</p> <p>-----</p>                                                                                                                                     |
| <p>VARIABLE</p> <p>QN29*4.33333</p>                                                                                                                                                                                                                    | <p>DOUBLE QN29_semaine</p>                                                                                                                                                    |
| <p>À quel âge (en mois) de %detailenfant% avez commencé à lui donner le sein ?</p> <p>E QN26==0</p> <p>V1 QN30&lt;=ageInMonths1    QN30&lt;=11</p> <p>M1 l'age doit etre inferieur ou egal a celui de l'enfant</p>                                     | <p>NUMERIC: INTEGER QN30</p> <p>-----</p>                                                                                                                                     |
| <p>Votre enfant %detailenfant% a été sevré?</p>                                                                                                                                                                                                        | <p>SINGLE-SELECT sevrage_yes_no</p> <p>01 <input type="radio"/> Oui</p> <p>00 <input type="radio"/> Non</p>                                                                   |
| <p>Jusqu'à quel âge (en mois) l'enfant a été sevré complètement (fin allaitement maternelle)</p> <p>E sevrage_yes_no==1</p> <p>V1 QN31&lt;=ageInMonths1    QN31&lt;=48</p> <p>M1 l'age en mois incorrecte</p>                                          | <p>NUMERIC: INTEGER QN31</p> <p>-----</p>                                                                                                                                     |
| <p>STATIC TEXT</p> <p><i>La santé de %detailenfant%</i></p>                                                                                                                                                                                            |                                                                                                                                                                               |
| <p>Avez-vous emmené %detailenfant% regulaiement au SMI ?</p>                                                                                                                                                                                           | <p>SINGLE-SELECT QN32A</p> <p>01 <input type="radio"/> Oui</p> <p>00 <input type="radio"/> Non</p>                                                                            |
| <p>Avez-vous un carnet SMI de %detailenfant% ?</p>                                                                                                                                                                                                     | <p>SINGLE-SELECT QN32B</p> <p>01 <input type="radio"/> Oui</p> <p>00 <input type="radio"/> Non</p>                                                                            |
| <p>Veuillez prendre la photo du carnet</p> <p>E QN32B==1</p>                                                                                                                                                                                           | <p>PICTURE QN32B_photo</p>                                                                                                                                                    |
| <p>A quel âge (en mois) de %detailenfant% avez-vous commencé à l' amené au SMI ?</p> <p>E QN32A==1</p> <p>V1 self &lt;= ageInMonths1</p> <p>M1 l'age doit etre inferieur ou egal a celui de l'enfant</p>                                               | <p>NUMERIC: INTEGER QN32C</p> <p>-----</p> <p>SPECIAL VALUES</p> <p>00 Moins d'un mois</p>                                                                                    |
| <p>Continuez-vous à emmener %detailenfant% regulaiement ?</p> <p>E QN32A==1</p>                                                                                                                                                                        | <p>SINGLE-SELECT QN32D</p> <p>01 <input type="radio"/> Oui</p> <p>00 <input type="radio"/> Non</p>                                                                            |
| <p>Donnez les raisons</p> <p>E QN32D==0</p>                                                                                                                                                                                                            | <p>SINGLE-SELECT QN32E</p> <p>01 <input type="radio"/> Etat nutritionnel amélioré</p> <p>02 <input type="radio"/> Manque de moyens</p> <p>03 <input type="radio"/> Autres</p> |

|                                                                                                      |                                                                                                           |
|------------------------------------------------------------------------------------------------------|-----------------------------------------------------------------------------------------------------------|
| <p>Quelle autre raisons</p> <p>E QN32E==3</p>                                                        | <p>TEXT</p> <p>QN32E_autre</p> <p>-----</p>                                                               |
| <p>A peu près combien de fois par an l'y amenez vous ?</p> <p>I Nombre de fois</p> <p>E QN32D==1</p> | <p>NUMERIC: INTEGER</p> <p>QN32F</p> <p>-----</p>                                                         |
| <p>Avait - Il/ elle reçu des vaccins ?</p> <p>E QN32D==1</p>                                         | <p>SINGLE-SELECT</p> <p>QN33A</p> <p>01 <input type="radio"/> Oui</p> <p>00 <input type="radio"/> Non</p> |

STATIC TEXT

E QN33A==1

*Montrez-moi svp la carte de vaccination (prise photo !)*

|                                                                         |                                                            |
|-------------------------------------------------------------------------|------------------------------------------------------------|
| <p>Enquêteur: Combien des fotos sont necessaires?</p> <p>E QN33A==1</p> | <p>NUMERIC: INTEGER</p> <p>numFotosVaccin</p> <p>-----</p> |
|-------------------------------------------------------------------------|------------------------------------------------------------|

NUTRITION / ENFANT

**Roster: FOTO CARTE DE VACCINATION**

generated by numeric question [numFotosVaccin](#)

fotosVaccin

|                           |                             |
|---------------------------|-----------------------------|
| <p>Foto %fotosVaccin%</p> | <p>PICTURE</p> <p>QN33B</p> |
|---------------------------|-----------------------------|

|                                                                                                                  |                                                                                                                                                                                                             |
|------------------------------------------------------------------------------------------------------------------|-------------------------------------------------------------------------------------------------------------------------------------------------------------------------------------------------------------|
| <p>Avait - Il/ elle reçu des suppléments de vitamine A ?</p> <p>E QN33A==1</p>                                   | <p>SINGLE-SELECT</p> <p>QN34</p> <p>01 <input type="radio"/> Oui</p> <p>00 <input type="radio"/> Non</p>                                                                                                    |
| <p>Au cours des dernières 24 heures, %detailenfant% a-t-il mangé ?</p>                                           | <p>SINGLE-SELECT</p> <p>QN35</p> <p>01 <input type="radio"/> Moins que d'habitude</p> <p>02 <input type="radio"/> autant que d'habitude</p> <p>03 <input type="radio"/> plus que d'habitude</p>             |
| <p>Votre enfant, a -t- il/ elle a déjà bénéficié d'une intervention alimentaire ?</p>                            | <p>SINGLE-SELECT</p> <p>QN36A</p> <p>01 <input type="radio"/> Oui</p> <p>00 <input type="radio"/> Non</p>                                                                                                   |
| <p>Combien de fois ?</p> <p>E QN36A==1</p> <p>V1 QN36B&lt;=20</p> <p>M1 le nombre de fois semble etre elevee</p> | <p>NUMERIC: INTEGER</p> <p>QN36B</p> <p>-----</p>                                                                                                                                                           |
| <p>Période d'intervention alimentaire</p> <p>E QN36A==1</p>                                                      | <p>SINGLE-SELECT</p> <p>QN36C</p> <p>01 <input type="radio"/> En cours</p> <p>02 <input type="radio"/> Plus maintenant - mais dans l'année dernière</p> <p>03 <input type="radio"/> il y a plus d'un an</p> |

|                                                                                                                                                       |                                                                                                                                                                                                                                                                                                                                                                                                                                                                                                                                                                                                 |
|-------------------------------------------------------------------------------------------------------------------------------------------------------|-------------------------------------------------------------------------------------------------------------------------------------------------------------------------------------------------------------------------------------------------------------------------------------------------------------------------------------------------------------------------------------------------------------------------------------------------------------------------------------------------------------------------------------------------------------------------------------------------|
| <p>%detailenfant% a-t-il déjà été diagnostiqué mal nutri par un professionnel de santé?</p>                                                           | <p>SINGLE-SELECT <span style="float: right;">QN37A</span></p> <p>01 <input type="radio"/> Oui</p> <p>00 <input type="radio"/> Non</p>                                                                                                                                                                                                                                                                                                                                                                                                                                                           |
| <p>Quand est-ce que l'enfant a été diagnostiqué mal nutri - Année</p>                                                                                 | <p>NUMERIC: INTEGER <span style="float: right;">QN37B</span></p> <p>-----</p>                                                                                                                                                                                                                                                                                                                                                                                                                                                                                                                   |
| <p>Quand est-ce que l'enfant a été diagnostiqué mal nutri - Mois ?</p>                                                                                | <p>SINGLE-SELECT <span style="float: right;">QN37Bm</span></p> <p>01 <input type="radio"/> Janvier</p> <p>02 <input type="radio"/> Fevrier</p> <p>03 <input type="radio"/> Mars</p> <p>04 <input type="radio"/> Avril</p> <p>05 <input type="radio"/> Mai</p> <p>06 <input type="radio"/> Juin</p> <p>07 <input type="radio"/> Juillet</p> <p>08 <input type="radio"/> Aout</p> <p>09 <input type="radio"/> Septembre</p> <p>10 <input type="radio"/> Octobre</p> <p>11 <input type="radio"/> Novembre</p> <p>12 <input type="radio"/> Decembre</p> <p>99 <input type="radio"/> Ne sait pas</p> |
| <p>%detailenfant% mange-t-il/elle à tous les repas (03 fois par jour)?</p>                                                                            | <p>SINGLE-SELECT <span style="float: right;">QG06</span></p> <p>01 <input type="radio"/> Oui</p> <p>00 <input type="radio"/> Non</p>                                                                                                                                                                                                                                                                                                                                                                                                                                                            |
| <p>%detailenfant% mange-t-il/elle les aliments du champ du ménage à tous les repas (03 fois par jour)?</p>                                            | <p>SINGLE-SELECT <span style="float: right;">QG07</span></p> <p>01 <input type="radio"/> Oui</p> <p>00 <input type="radio"/> Non</p>                                                                                                                                                                                                                                                                                                                                                                                                                                                            |
| <p>%detailenfant% mange-t-il/elle a satiété?</p>                                                                                                      | <p>SINGLE-SELECT <span style="float: right;">QG08</span></p> <p>01 <input type="radio"/> Oui</p> <p>00 <input type="radio"/> Non</p>                                                                                                                                                                                                                                                                                                                                                                                                                                                            |
| <p>%detailenfant% reçoit-il le plat familial ?</p>                                                                                                    | <p>SINGLE-SELECT <span style="float: right;">QG10A</span></p> <p>01 <input type="radio"/> Oui</p> <p>00 <input type="radio"/> Non</p>                                                                                                                                                                                                                                                                                                                                                                                                                                                           |
| <p>À quel âge pour la première fois ?</p>                                                                                                             | <p>NUMERIC: INTEGER <span style="float: right;">QG10B</span></p> <p>-----</p>                                                                                                                                                                                                                                                                                                                                                                                                                                                                                                                   |
| <p>I Age (en mois)</p> <p>E QG10A==1</p> <p>V1 QG10B&lt;=ageInMonths1</p> <p>M1 le nombre de mois doit etre inferieur ou egal a l'age de l'enfant</p> |                                                                                                                                                                                                                                                                                                                                                                                                                                                                                                                                                                                                 |
| <p>%detailenfant% a-t-il/elle été dans une formati on sanitaire dans les derniers 12 mois?</p>                                                        | <p>SINGLE-SELECT <span style="float: right;">QG11A</span></p> <p>01 <input type="radio"/> Oui</p> <p>00 <input type="radio"/> Non</p>                                                                                                                                                                                                                                                                                                                                                                                                                                                           |

|                                                                                                                                         |                                                                                                                                                                                                                                                                                                                                |
|-----------------------------------------------------------------------------------------------------------------------------------------|--------------------------------------------------------------------------------------------------------------------------------------------------------------------------------------------------------------------------------------------------------------------------------------------------------------------------------|
| <p>Pour quelle raison ?</p> <p>E QG11A==1</p>                                                                                           | <p>MULTI-SELECT QG11B</p> <p>01 <input type="checkbox"/> Consultation</p> <p>02 <input type="checkbox"/> Hospitalisation</p> <p>03 <input type="checkbox"/> probleme nutritionnel</p> <p>04 <input type="checkbox"/> Vaccination de routine</p> <p>09 <input type="checkbox"/> Autres à préciser</p>                           |
| <p>Autre Raisons a preciser</p> <p>E QG11B.Contains(9)</p>                                                                              | <p>TEXT QG11B_autre</p> <p>.....</p>                                                                                                                                                                                                                                                                                           |
| <p>Qui a vu l'enfant ?</p> <p>E QG12==1</p>                                                                                             | <p>MULTI-SELECT QG13B</p> <p>01 <input type="checkbox"/> Agent de santé du CSPS</p> <p>02 <input type="checkbox"/> Agent de santé du CMA</p> <p>03 <input type="checkbox"/> Investigateur d'étude</p> <p>04 <input type="checkbox"/> Agent CREN</p> <p>09 <input type="checkbox"/> Autres</p>                                  |
| <p>%detailenfant% a t-il/elle été présenté dans un e formation sanitaire dans les derniers 12 mois pour raison de la malnutrition ?</p> | <p>SINGLE-SELECT QG12</p> <p>01 <input type="radio"/> Oui</p> <p>00 <input type="radio"/> Non</p>                                                                                                                                                                                                                              |
| <p>À quelle occasion ?</p> <p>E QG12==1</p>                                                                                             | <p>SINGLE-SELECT QG13A</p> <p>01 <input type="radio"/> lors d'une campagne</p> <p>02 <input type="radio"/> lors d'une consultation</p> <p>03 <input type="radio"/> lors d'une vaccination de routine</p> <p>04 <input type="radio"/> lors de la participation à une étude</p> <p>09 <input type="radio"/> autre (précisez)</p> |
| <p>Quelle autre occasion</p> <p>E QG13A==9</p>                                                                                          | <p>TEXT QG13A_autre</p> <p>.....</p>                                                                                                                                                                                                                                                                                           |
| <p>donnez-vous à %detailenfant% les céréales de votre propre champ principalement?</p>                                                  | <p>SINGLE-SELECT QG16</p> <p>01 <input type="radio"/> Oui</p> <p>00 <input type="radio"/> Non</p>                                                                                                                                                                                                                              |
| <p>Avez-vous un jardin que vous cultivez vous -mêmes ?</p>                                                                              | <p>SINGLE-SELECT QG17</p> <p>01 <input type="radio"/> Oui</p> <p>00 <input type="radio"/> Non</p>                                                                                                                                                                                                                              |

|                                                                                                                                                  |                                                                                                                                                                                                                                                                                                                                                                                                                                                                                                                                                                                                                                                                                                      |
|--------------------------------------------------------------------------------------------------------------------------------------------------|------------------------------------------------------------------------------------------------------------------------------------------------------------------------------------------------------------------------------------------------------------------------------------------------------------------------------------------------------------------------------------------------------------------------------------------------------------------------------------------------------------------------------------------------------------------------------------------------------------------------------------------------------------------------------------------------------|
| <p>Quelles plantes/condiment/végétales cultivez-vous</p> <p>E QG17==1</p>                                                                        | <p>MULTI-SELECT <span style="float: right;">QG18</span></p> <p>44 <input type="checkbox"/> Carotte</p> <p>45 <input type="checkbox"/> Courgette</p> <p>46 <input type="checkbox"/> Citrouille/ courge</p> <p>47 <input type="checkbox"/> Persil</p> <p>48 <input type="checkbox"/> Poivron</p> <p>49 <input type="checkbox"/> Tomate</p> <p>50 <input type="checkbox"/> Aubergine</p> <p>51 <input type="checkbox"/> Avocat</p> <p>52 <input type="checkbox"/> Concombre</p> <p>53 <input type="checkbox"/> Gombo</p> <p>54 <input type="checkbox"/> Oignon</p> <p>55 <input type="checkbox"/> Ail</p> <p>56 <input type="checkbox"/> Fleur de kapokier</p> <p>99 <input type="checkbox"/> Autre</p> |
| <p>Quelle autre plante?</p> <p>E QG18.Contains(99)</p>                                                                                           | <p>TEXT <span style="float: right;">QG18autre</span></p> <p>.....</p>                                                                                                                                                                                                                                                                                                                                                                                                                                                                                                                                                                                                                                |
| <p>Ajoutez-vous les condiments/ herbes/ produit de votre jardin à votre cuisine ?</p> <p>I (question adressée à la mère)</p> <p>E QG17==1</p>    | <p>SINGLE-SELECT <span style="float: right;">QG19</span></p> <p>01 <input type="radio"/> Oui</p> <p>00 <input type="radio"/> Non</p>                                                                                                                                                                                                                                                                                                                                                                                                                                                                                                                                                                 |
| <p>Quelles?</p> <p>F QG18.Contains(@optioncode)</p> <p>E QG19==1</p>                                                                             | <p>MULTI-SELECT <span style="float: right;">QG20</span></p> <p>44 <input type="checkbox"/> Carotte</p> <p>45 <input type="checkbox"/> Courgette</p> <p>46 <input type="checkbox"/> Citrouille/ courge</p> <p>47 <input type="checkbox"/> Persil</p> <p>48 <input type="checkbox"/> Poivron</p> <p>49 <input type="checkbox"/> Tomate</p> <p>50 <input type="checkbox"/> Aubergine</p> <p>51 <input type="checkbox"/> Avocat</p> <p>52 <input type="checkbox"/> Concombre</p> <p>53 <input type="checkbox"/> Gombo</p> <p>54 <input type="checkbox"/> Oignon</p> <p>55 <input type="checkbox"/> Ail</p> <p>56 <input type="checkbox"/> Fleur de kapokier</p> <p>99 <input type="checkbox"/> Autre</p> |
| <p>Nom du répondant</p> <p>I (Si la personne n'est pas dans la liste, retournez à la [liste des membres](membres) e ajoutez cette personne!)</p> | <p>SINGLE-SELECT: LINKED <span style="float: right;">repondantNutrition</span></p> <p>SOURCE OF CATEGORIES: ROSTER <a href="#">MEMBRE</a></p>                                                                                                                                                                                                                                                                                                                                                                                                                                                                                                                                                        |

# INSÉCURITÉ ALIMENTAIRE

E \$OK && \$P1P2

INSÉCURITÉ ALIMENTAIRE

Roster: QUESTIONS

generated by list question [membres](#)

foodInsecurity

E age >= 12 && ( parente == 1546 || child.Count(x => x.motherid == @rowcode)>0 || child.Count(x => x.guardianid == @rowcode)>0 ) && residence.InList(1)

|                                                                                                                                                                                               |                                                                                                                                                                                                                                                                                                                                                                   |
|-----------------------------------------------------------------------------------------------------------------------------------------------------------------------------------------------|-------------------------------------------------------------------------------------------------------------------------------------------------------------------------------------------------------------------------------------------------------------------------------------------------------------------------------------------------------------------|
| <p>Ces quatre dernières semaines, étiez-vous <u>pré occupé que votre ménage n'avait pas assez de nourriture</u>?</p>                                                                          | <div>SINGLE-SELECTFI1</div> <div><div>01</div><div><input type="radio"/> Oui</div></div> <div><div>00</div><div><input type="radio"/> Non</div></div>                                                                                                                                                                                                             |
| <p>Avec quelle fréquence cette situation s'est-elle présentée?</p> <p>E FI1==1</p>                                                                                                            | <div>SINGLE-SELECTFI1frequence</div> <div><div>01</div><div><input type="radio"/> Rarement (1 ou 2 fois ces 4 dernières semaines)</div></div> <div><div>02</div><div><input type="radio"/> Parfois (3 à 10 fois ces 4 dernières semaines)</div></div> <div><div>03</div><div><input type="radio"/> Souvent (plus de 10 fois ces 4 dernières semaines)</div></div> |
| <p>Ces quatre dernières semaines, est-ce que vous-même ou un membre de votre ménage <u>n'a pas pu manger les types de nourriture que vous préférez</u> à cause d'un manque de ressources?</p> | <div>SINGLE-SELECTFI2</div> <div><div>01</div><div><input type="radio"/> Oui</div></div> <div><div>00</div><div><input type="radio"/> Non</div></div>                                                                                                                                                                                                             |
| <p>Avec quelle fréquence cette situation s'est-elle présentée?</p> <p>E FI2==1</p>                                                                                                            | <div>SINGLE-SELECTFI2frequence</div> <div><div>01</div><div><input type="radio"/> Rarement (1 ou 2 fois ces 4 dernières semaines)</div></div> <div><div>02</div><div><input type="radio"/> Parfois (3 à 10 fois ces 4 dernières semaines)</div></div> <div><div>03</div><div><input type="radio"/> Souvent (plus de 10 fois ces 4 dernières semaines)</div></div> |
| <p>Ces quatre dernières semaines, est-ce que vous-même ou un membre de votre ménage <u>a mangé une variété limitée d'aliments</u> parce que les ressources étaient insuffisantes?</p>         | <div>SINGLE-SELECTFI3</div> <div><div>01</div><div><input type="radio"/> Oui</div></div> <div><div>00</div><div><input type="radio"/> Non</div></div>                                                                                                                                                                                                             |
| <p>Avec quelle fréquence cette situation s'est-elle présentée?</p> <p>E FI3==1</p>                                                                                                            | <div>SINGLE-SELECTFI3frequence</div> <div><div>01</div><div><input type="radio"/> Rarement (1 ou 2 fois ces 4 dernières semaines)</div></div> <div><div>02</div><div><input type="radio"/> Parfois (3 à 10 fois ces 4 dernières semaines)</div></div> <div><div>03</div><div><input type="radio"/> Souvent (plus de 10 fois ces 4 dernières semaines)</div></div> |

|                                                                                                                                                                                                                                    |                                                                                                                                                                                                                                                                                                                        |
|------------------------------------------------------------------------------------------------------------------------------------------------------------------------------------------------------------------------------------|------------------------------------------------------------------------------------------------------------------------------------------------------------------------------------------------------------------------------------------------------------------------------------------------------------------------|
| <p>Ces quatre dernières semaines, est-ce que vous-même ou un membre de votre ménage <u>a mangé une nourriture que vous ne souhaitiez pas manger</u> à cause du manque de ressources pour obtenir d'autres types de nourriture?</p> | <p>SINGLE-SELECT <span style="float: right;">FI4</span></p> <p>01 <input type="radio"/> Oui</p> <p>00 <input type="radio"/> Non</p>                                                                                                                                                                                    |
| <p>Avec quelle fréquence cette situation s'est-elle présentée?</p> <p>E FI4==1</p>                                                                                                                                                 | <p>SINGLE-SELECT <span style="float: right;">FI4fréquence</span></p> <p>01 <input type="radio"/> Rarement (1 ou 2 fois ces 4 dernières semaines)</p> <p>02 <input type="radio"/> Parfois (3 à 10 fois ces 4 dernières semaines)</p> <p>03 <input type="radio"/> Souvent (plus de 10 fois ces 4 dernières semaines)</p> |
| <p>Ces quatre dernières semaines, est-ce que vous-même ou un membre de votre ménage <u>a mangé un repas plus petit que vous n'auriez souhaité</u> parce qu'il n'y avait pas assez à manger?</p>                                    | <p>SINGLE-SELECT <span style="float: right;">FI5</span></p> <p>01 <input type="radio"/> Oui</p> <p>00 <input type="radio"/> Non</p>                                                                                                                                                                                    |
| <p>Avec quelle fréquence cette situation s'est-elle présentée?</p> <p>E FI5==1</p>                                                                                                                                                 | <p>SINGLE-SELECT <span style="float: right;">FI5fréquence</span></p> <p>01 <input type="radio"/> Rarement (1 ou 2 fois ces 4 dernières semaines)</p> <p>02 <input type="radio"/> Parfois (3 à 10 fois ces 4 dernières semaines)</p> <p>03 <input type="radio"/> Souvent (plus de 10 fois ces 4 dernières semaines)</p> |
| <p>Ces quatre dernières semaines, est-ce que vous-même ou un membre de votre ménage <u>a mangé moins de repas par jour</u> parce qu'il n'y avait pas assez de nourriture?</p>                                                      | <p>SINGLE-SELECT <span style="float: right;">FI6</span></p> <p>01 <input type="radio"/> Oui</p> <p>00 <input type="radio"/> Non</p>                                                                                                                                                                                    |
| <p>Avec quelle fréquence cette situation s'est-elle présentée?</p> <p>E FI6==1</p>                                                                                                                                                 | <p>SINGLE-SELECT <span style="float: right;">FI6fréquence</span></p> <p>01 <input type="radio"/> Rarement (1 ou 2 fois ces 4 dernières semaines)</p> <p>02 <input type="radio"/> Parfois (3 à 10 fois ces 4 dernières semaines)</p> <p>03 <input type="radio"/> Souvent (plus de 10 fois ces 4 dernières semaines)</p> |
| <p>Ces quatre dernières semaines, est-il arrivé <u>que le ménage soit complètement sans nourriture</u> parce qu'il n'y avait pas de ressources pour en acheter?</p>                                                                | <p>SINGLE-SELECT <span style="float: right;">FI7</span></p> <p>01 <input type="radio"/> Oui</p> <p>00 <input type="radio"/> Non</p>                                                                                                                                                                                    |

|                                                                                                                                                                                                        |                                                                                                                                                                                                                                                                                                                        |
|--------------------------------------------------------------------------------------------------------------------------------------------------------------------------------------------------------|------------------------------------------------------------------------------------------------------------------------------------------------------------------------------------------------------------------------------------------------------------------------------------------------------------------------|
| <p>Avec quelle fréquence cette situation s'est-elle présentée?</p> <p>E FI7==1</p>                                                                                                                     | <p>SINGLE-SELECT <span style="float: right;">FI7frequence</span></p> <p>01 <input type="radio"/> Rarement (1 ou 2 fois ces 4 dernières semaines)</p> <p>02 <input type="radio"/> Parfois (3 à 10 fois ces 4 dernières semaines)</p> <p>03 <input type="radio"/> Souvent (plus de 10 fois ces 4 dernières semaines)</p> |
| <p>Ces quatre dernières semaines, est-ce que vous-même ou un membre de votre ménage <u>est allé au lit en ayant faim</u> parce qu'il n'y avait pas assez de nourriture?</p>                            | <p>SINGLE-SELECT <span style="float: right;">FI8</span></p> <p>01 <input type="radio"/> Oui</p> <p>00 <input type="radio"/> Non</p>                                                                                                                                                                                    |
| <p>Avec quelle fréquence cette situation s'est-elle présentée?</p> <p>E FI8==1</p>                                                                                                                     | <p>SINGLE-SELECT <span style="float: right;">FI8frequence</span></p> <p>01 <input type="radio"/> Rarement (1 ou 2 fois ces 4 dernières semaines)</p> <p>02 <input type="radio"/> Parfois (3 à 10 fois ces 4 dernières semaines)</p> <p>03 <input type="radio"/> Souvent (plus de 10 fois ces 4 dernières semaines)</p> |
| <p>Ces quatre dernières semaines, est-ce que vous-même ou un membre de votre ménage <u>a pas sé toute une journée et toute une nuit sans manger</u> parce qu'il n'y avait pas assez de nourriture?</p> | <p>SINGLE-SELECT <span style="float: right;">FI9</span></p> <p>01 <input type="radio"/> Oui</p> <p>00 <input type="radio"/> Non</p>                                                                                                                                                                                    |
| <p>Avec quelle fréquence cette situation s'est-elle présentée?</p> <p>E FI9==1</p>                                                                                                                     | <p>SINGLE-SELECT <span style="float: right;">FI9frequence</span></p> <p>01 <input type="radio"/> Rarement (1 ou 2 fois ces 4 dernières semaines)</p> <p>02 <input type="radio"/> Parfois (3 à 10 fois ces 4 dernières semaines)</p> <p>03 <input type="radio"/> Souvent (plus de 10 fois ces 4 dernières semaines)</p> |

# ANTHROPOMÉTRIE

E \$OK && \$P1P2

ANTHROPOMÉTRIE  
Roster: ANTHROPOMÉTRIE  
generated by list question [membres](#)

anthropometrie

E ageInMonths1<60

STATIC TEXT

*Now I would like to ask the mother of your child some questions about the health of your child under 5 years of age and I would like to take measurements of height and weight. After that I would like to continue with the questions about the mother of your child's health and the nutrition of your child under 5.*

|                                                                                                     |                                                                                   |      |
|-----------------------------------------------------------------------------------------------------|-----------------------------------------------------------------------------------|------|
| Is the health card available?                                                                       | SINGLE-SELECT<br>01 <input type="radio"/> Yes<br>02 <input type="radio"/> No      | an02 |
| Is the child a twin?                                                                                | SINGLE-SELECT<br>01 <input type="radio"/> Single<br>02 <input type="radio"/> Twin | an05 |
| Did the child have fever over the last 2 weeks?                                                     | SINGLE-SELECT<br>01 <input type="radio"/> Yes<br>02 <input type="radio"/> No      | an06 |
| Was the child diagnosed with Malaria over the last 2 weeks?                                         | SINGLE-SELECT<br>01 <input type="radio"/> Yes<br>02 <input type="radio"/> No      | an07 |
| Did the child have diarrhea over the last 2 weeks?                                                  | SINGLE-SELECT<br>01 <input type="radio"/> Yes<br>02 <input type="radio"/> No      | an08 |
| Did the child have any other diseases over the last 2 weeks?                                        | SINGLE-SELECT<br>01 <input type="radio"/> Yes<br>02 <input type="radio"/> No      | an09 |
| Did you visit the health care center or hospital over the last 2 weeks because your child was sick? | SINGLE-SELECT<br>01 <input type="radio"/> Yes<br>02 <input type="radio"/> No      | an10 |

ANTHROPOMÉTRIE / ANTHROPOMÉTRIE  
ANTHROPOMETRIC MEASURES

anthro\_measure

E QN02==1

STATIC TEXT

*Ask [%rosteritle%](#)'s mother if it has a health record with length and weight at birth. Write down the information below. Afterwards ask her to remove the shoes, heavy clothing and / or heavy layers from the child. The mother has to take off her shoes. Inform the mother that you will take the measurements twice one after another.*

|                                                                                                                                                                                                                                                                                                                                                       |                                                                                                                                                                                                               |
|-------------------------------------------------------------------------------------------------------------------------------------------------------------------------------------------------------------------------------------------------------------------------------------------------------------------------------------------------------|---------------------------------------------------------------------------------------------------------------------------------------------------------------------------------------------------------------|
| <p>Birth length in centimeter (##) (as in the health card)</p> <p>W1 (self&gt;=35 &amp;&amp; self&lt;=60)    self == 9999</p> <p>M1 Please check birth length - is this value correct?</p>                                                                                                                                                            | <p>NUMERIC: INTEGER <span>qn_blength</span></p> <p>-----</p> <p>SPECIAL VALUES</p> <p>9999      Don't know</p>                                                                                                |
| <p>Birth weight in gram (####) (as in the health card)</p> <p>W1 (self&gt;=1000 &amp;&amp; self&lt;=5000)    self == 9999</p> <p>M1 Please check birth weight - is this value correct?</p>                                                                                                                                                            | <p>NUMERIC: INTEGER <span>qn_bweight</span></p> <p>-----</p> <p>SPECIAL VALUES</p> <p>9999      Don't know</p>                                                                                                |
| <p>Measurement</p> <p>V1 self == 1 ? (qn_height1&lt;85    ageInMonths1&lt;=24) : true</p> <p>M1 L'enfant devrait être mesuré debout!</p> <p>V2 self == 2 ? (qn_height1&gt;=85    ageInMonths1&gt;24) : true</p> <p>M2 L'enfant devrait être mesuré couché!</p>                                                                                        | <p>SINGLE-SELECT <span>qn_measurement</span></p> <p>01      <input type="radio"/> lying (younger than 2 yrs or below 85cm)</p> <p>02      <input type="radio"/> standing (older than 2 yrs or above 85cm)</p> |
| <p>VARIABLE</p> <p>ageInMonths1&lt;=6?6: ageInMonths1&lt;=12?12: ageInMonths1&lt;=24?24: ageInMonths1&lt;=36?36: ageInMonths1&lt;=48?48: ageInMonths1&lt;=60?60: 60</p>                                                                                                                                                                               | <p>LONG <span>age_bracket</span></p> <p>This variable is excluded from the exported data</p>                                                                                                                  |
| <p>STATIC TEXT</p> <p>E false</p> <p><i>Age (months): %ageInMonths1% (age bracket: %age_bracket%)</i></p>                                                                                                                                                                                                                                             |                                                                                                                                                                                                               |
| <p>Height1 today in centimeter (###,#)</p> <p>W1 // WHO growth standards height for age (0 to 60 months) by sex sexe==2 ? self.InRange(Height[(int)age_bracket].minF,Height[(int)age_bracket].maxF) : self.InRange(Height[(int)age_bracket].min <a href="#">And 1056 other symbols [1]</a></p> <p>M1 Please check height - is this value correct?</p> | <p>NUMERIC: DECIMAL <span>qn_height1</span></p> <p>-----</p>                                                                                                                                                  |
| <p>Height2 today in centimeter (###,#)</p> <p>V1 (qn_height1-self)&lt;=2.01 &amp;&amp; (qn_height1-self)&gt;=-2.01</p> <p>M1 The difference of both measurements is more then 2 cm - please check and correct or remeasure!</p>                                                                                                                       | <p>NUMERIC: DECIMAL <span>qn_height2</span></p> <p>-----</p>                                                                                                                                                  |
| <p>Weight1 today in kilogram (##,#)</p> <p>W1 // WHO growth standards weight for age (0 to 5 years) by sex sexe==2 ? self.InRange(Weight[(int)age_bracket].minF,Weight[(int)age_bracket].maxF) : self.InRange(Weight[(int)age_bracket].minM,w <a href="#">And 946 other symbols [2]</a></p> <p>M1 Please check weight - is this value correct?</p>    | <p>NUMERIC: DECIMAL <span>qn_weight1</span></p> <p>-----</p>                                                                                                                                                  |
| <p>Weight2 today in kilogram (##,#)</p> <p>V1 (qn_weight1-self)&lt;=0.31 &amp;&amp; (qn_weight1-self)&gt;=-0.31</p> <p>M1 The difference of both measurements is more then 300 gram - please check and correct or remeasure!</p>                                                                                                                      | <p>NUMERIC: DECIMAL <span>qn_weight2</span></p> <p>-----</p>                                                                                                                                                  |
| <p>Do you want to enter a comment?</p> <p>I eg if there are problems to perform the measurement, or if there are factors influencing the measurement's precision, eg physical disability of the child etc.</p>                                                                                                                                        | <p>SINGLE-SELECT <span>has_comment_child</span></p> <p>01      <input type="radio"/> Yes</p> <p>02      <input type="radio"/> No</p>                                                                          |

|                                                                                                                                                                                                                                                                                            |  |                                                                                                    |
|--------------------------------------------------------------------------------------------------------------------------------------------------------------------------------------------------------------------------------------------------------------------------------------------|--|----------------------------------------------------------------------------------------------------|
| Comment to child's height and weight measurement<br>E has_comment_child==1                                                                                                                                                                                                                 |  | TEXT<br>qn_comment_child<br>.....                                                                  |
| STATIC TEXT<br><i>From the mother</i>                                                                                                                                                                                                                                                      |  |                                                                                                    |
| Mother's Height1 today in centimeter (###,#)<br>W1 self>150 && self<190<br>M1 Please check height - is this a true value?                                                                                                                                                                  |  | NUMERIC: DECIMAL<br>qn_heightm1<br>.....                                                           |
| Mother's Height2 today in centimeter (###,#)<br>W1 self>150 && self<190<br>M1 Please check height - is this a true value?<br>V2 (qn_heightm1-self)<=2.01 && (qn_heightm1-self)>=-2.01<br>M2 The difference of both measurements is more then 2 cm - please check and correct or remeasure! |  | NUMERIC: DECIMAL<br>qn_heightm2<br>.....                                                           |
| Mother's Weight1 today in kilogram (##,#)<br>W1 self>48 && self<90<br>M1 Please check weight - is this a true value?                                                                                                                                                                       |  | NUMERIC: DECIMAL<br>qn_weightm1<br>.....                                                           |
| Mother's weight2 today in kilogram (##,#)<br>W1 self>48 && self<90<br>M1 Please check weight - is this a true value?<br>V2 (qn_weightm1-self)<=0.21 && (qn_weightm1-self)>=-0.21<br>M2 The difference of both measurements is more then 200 gram - please check and correct or remeasure!  |  | NUMERIC: DECIMAL<br>qn_weightm2<br>.....                                                           |
| Do you want to enter a comment?<br>I eg if there are problems to perform the measurement, or if there are factors influencing the measurement's precision                                                                                                                                  |  | SINGLE-SELECT<br>has_comment_mother<br>01 <input type="radio"/> Yes<br>02 <input type="radio"/> No |
| Comment to mothers's height and weight measurement<br>E has_comment_mother==1                                                                                                                                                                                                              |  | TEXT<br>qn_comment_mother<br>.....                                                                 |

REVENUS ET DÉPENSES

E \$OK1 && (\$P1P2 || \$randomSampleRound1)

REVENUS ET DÉPENSES  
Roster: REVENUS/DÉPENSES  
generated by list question membres

rmembre

E age>14 && residence.InList(1)

STATIC TEXT

Production agricole pendant la campagne passée

%rmembre% a cultivé l'un des produits agricoles énoncés au cours de la campagne passée?

MULTI-SELECT: YES/NO

rproduit

- 01☐/ ☐ Arachides et sous produits
- 02☐/ ☐ Calebasses (entières
- 03☐/ ☐ Chou
- 04☐/ ☐ Coton et sous produits
- 05☐/ ☐ Fonio
- 06☐/ ☐ Cultures fruitières
- 07☐/ ☐ Igname
- 08☐/ ☐ Mais et sous produits
- 09☐/ ☐ Mil/ sorgho et sous produits
- 10☐/ ☐ Niébé et sous produits
- 11☐/ ☐ Oignon
- 12☐/ ☐ Oseille et sous produits
- 13☐/ ☐ Pastèque
- 14☐/ ☐ Pomme de terre
- 15☐/ ☐ Pois de terre et sous produits
- 16☐/ ☐ Riz et sous produits

[And 9 other symbols \[11\]](#)

REVENUS ET DÉPENSES / REVENUS/DÉPENSES  
Roster: CULTIVÉ  
generated by multi-select question rproduit

rproduit

quel est la Quantité de %rproduit% produit?

NUMERIC: INTEGER

qtiteproduit

I veuillez noter la quantité et continuer pour selectionner l'unité

-----

|                                          |                                                                                                                                                                                                                                                                                                                                                                                                                                                                                                          |
|------------------------------------------|----------------------------------------------------------------------------------------------------------------------------------------------------------------------------------------------------------------------------------------------------------------------------------------------------------------------------------------------------------------------------------------------------------------------------------------------------------------------------------------------------------|
| Quel est l'unité de mesure de %rproduit% | <div>SINGLE-SELECT</div> <div>uniteMesure</div> <div><div>01</div><div><input type="radio"/></div><div>Boîte</div></div> <div><div>02</div><div><input type="radio"/></div><div>Tine</div></div> <div><div>03</div><div><input type="radio"/></div><div>Sac</div></div> <div><div>04</div><div><input type="radio"/></div><div>Kilogramme</div></div> <div><div>05</div><div><input type="radio"/></div><div>Nombre</div></div> <div><div>06</div><div><input type="radio"/></div><div>Tonne</div></div> |
|------------------------------------------|----------------------------------------------------------------------------------------------------------------------------------------------------------------------------------------------------------------------------------------------------------------------------------------------------------------------------------------------------------------------------------------------------------------------------------------------------------------------------------------------------------|

STATIC TEXT

Revenu monétaire par vente de produits agropastoraux

|                                                                                                                     |                                                                                                                                                                                                                                                                                                                                                                                                                                                                                                                                                                                                                                                                                                                                                                                                                                                                                                                                                                                                                                                                                                                                                                                                                                                                                                                                                                                                                                                                                                                                                                                                                                                                                                                                                                                                                                                                                                                                                                                                                                                                                                                |
|---------------------------------------------------------------------------------------------------------------------|----------------------------------------------------------------------------------------------------------------------------------------------------------------------------------------------------------------------------------------------------------------------------------------------------------------------------------------------------------------------------------------------------------------------------------------------------------------------------------------------------------------------------------------------------------------------------------------------------------------------------------------------------------------------------------------------------------------------------------------------------------------------------------------------------------------------------------------------------------------------------------------------------------------------------------------------------------------------------------------------------------------------------------------------------------------------------------------------------------------------------------------------------------------------------------------------------------------------------------------------------------------------------------------------------------------------------------------------------------------------------------------------------------------------------------------------------------------------------------------------------------------------------------------------------------------------------------------------------------------------------------------------------------------------------------------------------------------------------------------------------------------------------------------------------------------------------------------------------------------------------------------------------------------------------------------------------------------------------------------------------------------------------------------------------------------------------------------------------------------|
| %rmembre% a vendu des produits agropastoraux énoncés au cours du mois passé et des 5 mois précédent le mois passé.? | <div>MULTI-SELECT: YES/NO</div> <div>produitVendu</div> <div><div>01</div><div><input type="checkbox"/></div><div><input type="checkbox"/></div><div>Arachides et sous produits</div></div> <div><div>02</div><div><input type="checkbox"/></div><div><input type="checkbox"/></div><div>Calebasses (par moitié)</div></div> <div><div>03</div><div><input type="checkbox"/></div><div><input type="checkbox"/></div><div>Chou</div></div> <div><div>04</div><div><input type="checkbox"/></div><div><input type="checkbox"/></div><div>Coton et sous produits</div></div> <div><div>05</div><div><input type="checkbox"/></div><div><input type="checkbox"/></div><div>Fonio</div></div> <div><div>06</div><div><input type="checkbox"/></div><div><input type="checkbox"/></div><div>Cultures fruitières</div></div> <div><div>07</div><div><input type="checkbox"/></div><div><input type="checkbox"/></div><div>Igname</div></div> <div><div>08</div><div><input type="checkbox"/></div><div><input type="checkbox"/></div><div>Mais et sous produits</div></div> <div><div>09</div><div><input type="checkbox"/></div><div><input type="checkbox"/></div><div>Sorgho et sous produits</div></div> <div><div>38</div><div><input type="checkbox"/></div><div><input type="checkbox"/></div><div>Petit mil et sous produits</div></div> <div><div>10</div><div><input type="checkbox"/></div><div><input type="checkbox"/></div><div>Niébé et sous produits</div></div> <div><div>11</div><div><input type="checkbox"/></div><div><input type="checkbox"/></div><div>Oignon</div></div> <div><div>12</div><div><input type="checkbox"/></div><div><input type="checkbox"/></div><div>Oseille et sous produits</div></div> <div><div>13</div><div><input type="checkbox"/></div><div><input type="checkbox"/></div><div>Pastèque</div></div> <div><div>14</div><div><input type="checkbox"/></div><div><input type="checkbox"/></div><div>Pomme de terre</div></div> <div><div>15</div><div><input type="checkbox"/></div><div><input type="checkbox"/></div><div>Pois de terre et sous-produits</div></div> |
|---------------------------------------------------------------------------------------------------------------------|----------------------------------------------------------------------------------------------------------------------------------------------------------------------------------------------------------------------------------------------------------------------------------------------------------------------------------------------------------------------------------------------------------------------------------------------------------------------------------------------------------------------------------------------------------------------------------------------------------------------------------------------------------------------------------------------------------------------------------------------------------------------------------------------------------------------------------------------------------------------------------------------------------------------------------------------------------------------------------------------------------------------------------------------------------------------------------------------------------------------------------------------------------------------------------------------------------------------------------------------------------------------------------------------------------------------------------------------------------------------------------------------------------------------------------------------------------------------------------------------------------------------------------------------------------------------------------------------------------------------------------------------------------------------------------------------------------------------------------------------------------------------------------------------------------------------------------------------------------------------------------------------------------------------------------------------------------------------------------------------------------------------------------------------------------------------------------------------------------------|

[And 22 other symbols \[12\]](#)

REVENUS ET DÉPENSES / REVENUS/DÉPENSES

Roster: VENDU

generated by multi-select question produitVendu

|                                                           |                                                                                                                                                        |
|-----------------------------------------------------------|--------------------------------------------------------------------------------------------------------------------------------------------------------|
| Montant du %rProduitVendu% vendu le mois passé? (CFA)     | <div>NUMERIC: INTEGER</div> <div>montantvenduMois</div> <div>-----</div>                                                                               |
| Montant du %rProduitVendu% vendu les 6 mois passés? (CFA) | <div>NUMERIC: INTEGER</div> <div>montantvendu5moispre</div> <div>-----</div> <div>SPECIAL VALUES</div> <div><div>-01</div><div>Ne sait pas</div></div> |

STATIC TEXT

Revenu monétaire par salaires, vente de produits NON-agropastoraux, commerce et pensions

|                                                                                                                                                                                                |                                                                                                                                                                                                                                                                                                                                                                                                                                                |
|------------------------------------------------------------------------------------------------------------------------------------------------------------------------------------------------|------------------------------------------------------------------------------------------------------------------------------------------------------------------------------------------------------------------------------------------------------------------------------------------------------------------------------------------------------------------------------------------------------------------------------------------------|
| <p><b>%rmembre%</b> a touché, dans le 6 mois passés, u<br/>n revenu monétaire provenant d'un salaire, de l<br/>a vente de produits NON agropastoraux, d'un c<br/>ommerce ou d'une pension?</p> | <p>SINGLE-SELECT <span>revenuMone_yes_no</span></p> <p>01 <input type="radio"/> Oui</p> <p>00 <input type="radio"/> Non</p>                                                                                                                                                                                                                                                                                                                    |
| <p>Quelle est la source du Revenu Monetaire?</p> <p>E <code>revenuMone_yes_no==1</code></p>                                                                                                    | <p>MULTI-SELECT <span>sourceRevenu</span></p> <p>01 <input type="checkbox"/> Salaire régulier</p> <p>02 <input type="checkbox"/> Salaire occasionnel</p> <p>03 <input type="checkbox"/> Vente de produits Non agro<br/>pastoraux</p> <p>04 <input type="checkbox"/> Commerce</p> <p>05 <input type="checkbox"/> Pension de retraite, Pension<br/>alimentaire, Allocations fami<br/>liales</p> <p>06 <input type="checkbox"/> Autre sources</p> |
| <p>Autre Revenu monetaire</p> <p>E <code>sourceRevenu.Contains(6)</code></p>                                                                                                                   | <p>TEXT <span>autreRevenu</span></p> <p>.....</p>                                                                                                                                                                                                                                                                                                                                                                                              |

REVENUS ET DÉPENSES / REVENUS/DÉPENSES

Roster: REVENU

generated by multi-select question [sourceRevenu](#)

|                                                                                     |                                                                                                                                       |
|-------------------------------------------------------------------------------------|---------------------------------------------------------------------------------------------------------------------------------------|
|                                                                                     | <p>revenus</p>                                                                                                                        |
| <p>Montant du revenu de <b>%rosteritle%</b> du <u>mois p<br/>assé</u>? (CFA)</p>    | <p>NUMERIC: INTEGER <span>montantRevenu</span></p> <p>-----</p> <p>SPECIAL VALUES</p> <p>0000000 Néant</p> <p>9999999 Ne sait pas</p> |
| <p>Montant du revenu de <b>%rosteritle%</b> des <u>6 moi<br/>s passé</u>? (CFA)</p> | <p>NUMERIC: INTEGER <span>montantRevenu5Mois</span></p> <p>-----</p> <p>SPECIAL VALUES</p> <p>00 Néant</p> <p>-01 Ne sait pas</p>     |

|                                                                                                                                                                                          |                                                                                                                                                                                                                                                                                                                                                                                                                                                                                                    |
|------------------------------------------------------------------------------------------------------------------------------------------------------------------------------------------|----------------------------------------------------------------------------------------------------------------------------------------------------------------------------------------------------------------------------------------------------------------------------------------------------------------------------------------------------------------------------------------------------------------------------------------------------------------------------------------------------|
| <p>Si salaires réguliers ou pensions, dans quelle tr<br/>anche se situe le salaire ?</p> <p>E <code>sourceRevenu.Contains(1)    sourceRevenu.Contains(5) &amp;&amp;f<br/>alse</code></p> | <p>SINGLE-SELECT <span>tranchesSalaire</span></p> <p>01 <input type="radio"/> 20 000 CFA ou moins</p> <p>02 <input type="radio"/> Entre 21 et 35 000 CFA</p> <p>03 <input type="radio"/> Entre 36 et 50 000 CFA</p> <p>04 <input type="radio"/> Entre 51 et 75 000 CFA</p> <p>05 <input type="radio"/> Entre 76 et 125 000 CFA</p> <p>06 <input type="radio"/> Entre 126 et 175 000 CFA</p> <p>07 <input type="radio"/> 176 000 CFA ou plus</p> <p>08 <input type="radio"/> Refuse de répondre</p> |
|------------------------------------------------------------------------------------------------------------------------------------------------------------------------------------------|----------------------------------------------------------------------------------------------------------------------------------------------------------------------------------------------------------------------------------------------------------------------------------------------------------------------------------------------------------------------------------------------------------------------------------------------------------------------------------------------------|

STATIC TEXT

Transferts et versements

|                                                                                                                                                    |                                                                                                                                                                                                                                                                                                                                                                                                                                                                                                                                                                                                                                 |
|----------------------------------------------------------------------------------------------------------------------------------------------------|---------------------------------------------------------------------------------------------------------------------------------------------------------------------------------------------------------------------------------------------------------------------------------------------------------------------------------------------------------------------------------------------------------------------------------------------------------------------------------------------------------------------------------------------------------------------------------------------------------------------------------|
| <p><b>%rmembre%</b> , est-ce que un membre de votre famille ou un ami vous a versé de l'argent, ou vous avez pris un crédit les 6 mois passés?</p> | <div>SINGLE-SELECT<span>versementArg</span></div> <div><div>01</div><div><input type="radio"/> Oui</div></div> <div><div>00</div><div><input type="radio"/> Non</div></div>                                                                                                                                                                                                                                                                                                                                                                                                                                                     |
| <p>Quelle est la Source provenance de ce argent?</p> <p>E <code>versementArg==1</code></p>                                                         | <div>MULTI-SELECT<span>sourceProvenance</span></div> <div><div>01</div><div><input type="checkbox"/> Parents dans le ménage (fils , fille, neveu, père, etc.)</div></div> <div><div>02</div><div><input type="checkbox"/> Parents à l'extérieur du ménage (fils, fille, neveu, père, et c.)</div></div> <div><div>03</div><div><input type="checkbox"/> Amis</div></div> <div><div>04</div><div><input type="checkbox"/> Emigrés en dehors du pays ( amis ou parents)</div></div> <div><div>05</div><div><input type="checkbox"/> Crédit</div></div> <div><div>06</div><div><input type="checkbox"/> Autre personne</div></div> |

REVENUS ET DÉPENSES / REVENUS/DÉPENSES

Roster: VERSEMENT

generated by multi-select question [sourceProvenance](#)

|                                        |                                                                                                                                         |
|----------------------------------------|-----------------------------------------------------------------------------------------------------------------------------------------|
| <div>versements</div>                  |                                                                                                                                         |
| <p>Montant du mois passé? (CFA)</p>    | <div>NUMERIC: INTEGER<span>montantMois</span></div> <div>-----</div> <div>SPECIAL VALUES</div> <div><div>00</div><div>Néant</div></div> |
| <p>Montant des 6 mois passé? (CFA)</p> | <div>NUMERIC: INTEGER<span>montant5MoisPasse</span></div> <div>-----</div>                                                              |

| Pour quoi a été utilisé cet argent? | MULTI-SELECT | utilisation                                                                                                                            |
|-------------------------------------|--------------|----------------------------------------------------------------------------------------------------------------------------------------|
|                                     | 01           | <input type="checkbox"/> Soutien à la famille pour des dépenses quotidiennes (repas, ménage, transports quotidiens, logement)          |
|                                     | 02           | <input type="checkbox"/> Soutien à la famille pour des réparations occasionnelles dans la maison ou d'outils ou de moyens de transport |
|                                     | 03           | <input type="checkbox"/> Fêtes, cérémonies (mariage, baptême, décès/funérailles)                                                       |
|                                     | 04           | <input type="checkbox"/> Soins médicaux                                                                                                |
|                                     | 05           | <input type="checkbox"/> Scolarisation, Education, Alphabétisation                                                                     |
|                                     | 06           | <input type="checkbox"/> Assurance maladie (AMU, AS MAT, ...) (inscription et/ou cotisation)                                           |
|                                     | 07           | <input type="checkbox"/> Autre destination                                                                                             |
|                                     | 08           | <input type="checkbox"/> Néant                                                                                                         |

STATIC TEXT

Dépenses du ménage

%r**membre**% avez vous dépensé de l'argent pour l'un ou plusieurs des motifs suivants dans les 6 mois passé?

I Lire la liste

|                                          | MULTI-SELECT: YES/NO                                                                                           | depenseMembre |
|------------------------------------------|----------------------------------------------------------------------------------------------------------------|---------------|
| 01                                       | <input type="checkbox"/> / <input type="checkbox"/> Loyer                                                      |               |
| 02                                       | <input type="checkbox"/> / <input type="checkbox"/> Electricité                                                |               |
| 03                                       | <input type="checkbox"/> / <input type="checkbox"/> Téléphone                                                  |               |
| 04                                       | <input type="checkbox"/> / <input type="checkbox"/> Matériaux de construction (tôles, briques, secos, ...)     |               |
| 05                                       | <input type="checkbox"/> / <input type="checkbox"/> Boissons ou eau                                            |               |
| 06                                       | <input type="checkbox"/> / <input type="checkbox"/> Vivres (céréales, condiments, ...)                         |               |
| 07                                       | <input type="checkbox"/> / <input type="checkbox"/> Ticket de transport ou Carburant                           |               |
| 08                                       | <input type="checkbox"/> / <input type="checkbox"/> Achat ou réparation d'un moyen de transport                |               |
| 09                                       | <input type="checkbox"/> / <input type="checkbox"/> Scolarisation, Education, Alphabétisation                  |               |
| 10                                       | <input type="checkbox"/> / <input type="checkbox"/> Vêtements                                                  |               |
| 11                                       | <input type="checkbox"/> / <input type="checkbox"/> Soins médicaux                                             |               |
| 12                                       | <input type="checkbox"/> / <input type="checkbox"/> Assurance maladie (AMBC)                                   |               |
| 13                                       | <input type="checkbox"/> / <input type="checkbox"/> Engrais, pesticide                                         |               |
| 14                                       | <input type="checkbox"/> / <input type="checkbox"/> Outils agricoles ou frais de réparation d'outils agricoles |               |
| 15                                       | <input type="checkbox"/> / <input type="checkbox"/> Animaux                                                    |               |
| 16                                       | <input type="checkbox"/> / <input type="checkbox"/> Dépenses religieuses                                       |               |
| <a href="#">And 7 other symbols [13]</a> |                                                                                                                |               |

|                                                                             |                                                                                                                                                           |
|-----------------------------------------------------------------------------|-----------------------------------------------------------------------------------------------------------------------------------------------------------|
| Montant de <a href="#">%rdepenseMembre%</a> dépensé le mois passé? (CFA)    | <div>NUMERIC: INTEGER</div> <div>montantDep</div> <div>-----</div> <div>SPECIAL VALUES</div> <div>0000000 Néant</div> <div>9999999 Ne sait pas</div>      |
| Montant de <a href="#">%rdepenseMembre%</a> dépensé les 6 mois passé? (CFA) | <div>NUMERIC: INTEGER</div> <div>montantDep5mois</div> <div>-----</div> <div>SPECIAL VALUES</div> <div>0000000 Néant</div> <div>9999999 Ne sait pas</div> |

# MORBIDITÉ

E /\* \$OK1 && membre.Any(member => member.maladieChronique==1 | member.autreMaladie==1) && \$randomSampleRound1 \*/ \$OK1  
&& \$randomSampleRound1

MORBIDITÉ

Roster: MALADIES CHRONIQUES

generated by list question [membres](#)

maladieChronique==1

chronique

STATIC TEXT

2.1: *Inventaire des maladies chroniques et de leurs épisodes au cours des 30 derniers jours*

|                                                   |                             |
|---------------------------------------------------|-----------------------------|
| Nom de la maladie chronique                       | LIST<br>nomMaladieChronique |
| I Ecrire NSP si %chronique% ne connaît pas le nom | .....                       |

MORBIDITÉ / MALADIES CHRONIQUES

Roster: MALADIE

generated by list question [nomMaladieChronique](#)

r\_chronique

|                                                                     |                                                      |
|---------------------------------------------------------------------|------------------------------------------------------|
| Verifiez le nom de la maladie e ecrivez le nom e n francais         | TEXT<br>SCOPE: SUPERVISOR<br>maladieChroniqueVerifie |
| I (we could select the name from the list of chronic diseases?)     | .....                                                |
| VARIABLE<br>nomMaladieChronique[@rowcode-1].ToString().Substring(5) | STRING<br>nomMC                                      |

MORBIDITÉ / MALADIES CHRONIQUES / MALADIE

Roster: SYMPTÔME

generated by fixed list

r\_symptomes

- 01 Symptôme 1
- 02 Symptôme 2
- 03 Symptôme 3
- 04 Symptôme 4
- 05 Symptôme 5
- 06 Symptôme 6

De quels symptômes souffrez-vous à cause de votre maladie chronique?

I Marquez "NON APPLICABLE" s'il n'y a plus de symptômes

SINGLE-SELECT: COMBO BOX

symptoms

00

☐

NON APPLICABLE

01

☐

Abcès

02

☐

Anémie

03

☐

Bouche fermée, crispée

04

☐

Boutons

05

☐

Boutons sur tout le corps

06

☐

Constipation

07

☐

Convulsions

08

☐

Corps chaud

09

☐

Corps enflé (œdème général )

10

☐

Coup rejeté en arrière

11

☐

Démangeaisons (prurit)

12

☐

Déshydratation

13

☐

Diarrhée aigue

14

☐

Diarrhée chronique

15

☐

Difficultés à respirer (dyspnée)

[And 63 other symbols \[19\]](#)

Enqueteur: Selectionnez la maladie dans la liste

|                                                                                                                                                                                                    |  |                                           |                                                                                        |                      |
|----------------------------------------------------------------------------------------------------------------------------------------------------------------------------------------------------|--|-------------------------------------------|----------------------------------------------------------------------------------------|----------------------|
|                                                                                                                                                                                                    |  | SINGLE-SELECT: COMBO BOX                  |                                                                                        | codeMaladieChronique |
|                                                                                                                                                                                                    |  | 100                                       | <input type="radio"/> Maladies ou infections pulm<br>onaires chroniques (poumo<br>ns)  |                      |
|                                                                                                                                                                                                    |  | 101                                       | <input type="radio"/> Asthme                                                           |                      |
|                                                                                                                                                                                                    |  | 102                                       | <input type="radio"/> Tuberculose                                                      |                      |
|                                                                                                                                                                                                    |  | 103                                       | <input type="radio"/> Maladies ou infections ocula<br>ires chroniques (œil)            |                      |
|                                                                                                                                                                                                    |  | 104                                       | <input type="radio"/> Conjonctivite chronique                                          |                      |
|                                                                                                                                                                                                    |  | 105                                       | <input type="radio"/> Borgne                                                           |                      |
|                                                                                                                                                                                                    |  | 106                                       | <input type="radio"/> Carence en vitamine A (avita<br>minose A)                        |                      |
|                                                                                                                                                                                                    |  | 107                                       | <input type="radio"/> Cataracte                                                        |                      |
|                                                                                                                                                                                                    |  | 108                                       | <input type="radio"/> Cécité / Aveugle                                                 |                      |
|                                                                                                                                                                                                    |  | 109                                       | <input type="radio"/> Cécité nocturne ou crépusc<br>ulaire                             |                      |
|                                                                                                                                                                                                    |  | 110                                       | <input type="radio"/> Onchocercose (cécité des ri<br>vières)                           |                      |
|                                                                                                                                                                                                    |  | 111                                       | <input type="radio"/> Tension de l'œil (glaucome)                                      |                      |
|                                                                                                                                                                                                    |  | 112                                       | <input type="radio"/> Trachome                                                         |                      |
|                                                                                                                                                                                                    |  | 113                                       | <input type="radio"/> Maladies ou infections derm<br>atologiques chroniques (pe<br>au) |                      |
|                                                                                                                                                                                                    |  | 114                                       | <input type="radio"/> Gale                                                             |                      |
|                                                                                                                                                                                                    |  | 115                                       | <input type="radio"/> Teignes (dermatophyties)                                         |                      |
|                                                                                                                                                                                                    |  | <a href="#">And 51 other symbols [14]</a> |                                                                                        |                      |
| Qui vous a dit le nom de votre maladie ?                                                                                                                                                           |  | SINGLE-SELECT                             |                                                                                        | sourceNomChronique   |
| E nomMaladieChronique[@rowcode-1].ToString().ToUpper() !=<br>(@rowcode + " -> " + "NSP") /* don't show question for l<br>istentries "nsp", "NSP", etc. so it gets a N/A value auto<br>matically */ |  | 01                                        | <input type="radio"/> Evident (par exemple dans l<br>e cas d'un accident)              |                      |
|                                                                                                                                                                                                    |  | 02                                        | <input type="radio"/> Mère ou père                                                     |                      |
|                                                                                                                                                                                                    |  | 03                                        | <input type="radio"/> Personnel de santé                                               |                      |
|                                                                                                                                                                                                    |  | 04                                        | <input type="radio"/> Autres personnes                                                 |                      |
|                                                                                                                                                                                                    |  | 05                                        | <input type="radio"/> Moi-même                                                         |                      |
|                                                                                                                                                                                                    |  | 06                                        | <input type="radio"/> Ne sait pas                                                      |                      |
| VARIABLE                                                                                                                                                                                           |  | STRING                                    |                                                                                        | codeSourceMC         |
| new string[] {"EVI", "MPD", "PDS", "AUP", "MOM", "NSP", "NAP"}<br>[(int) sourceNomChronique-1]                                                                                                     |  |                                           |                                                                                        |                      |
| STATIC TEXT                                                                                                                                                                                        |  |                                           |                                                                                        |                      |
| E false                                                                                                                                                                                            |  |                                           |                                                                                        |                      |
| %codeSourceMC%                                                                                                                                                                                     |  |                                           |                                                                                        |                      |
| STATIC TEXT                                                                                                                                                                                        |  |                                           |                                                                                        |                      |
| À quelle date a débuté votre maladie ?                                                                                                                                                             |  |                                           |                                                                                        |                      |

|                                                                                                                                                                                                                                |                                                                                                                                                                                                                                                                                                                                                                                                                                                                                                                                                                                                                                                                                                                                                                                                                                                                                                    |
|--------------------------------------------------------------------------------------------------------------------------------------------------------------------------------------------------------------------------------|----------------------------------------------------------------------------------------------------------------------------------------------------------------------------------------------------------------------------------------------------------------------------------------------------------------------------------------------------------------------------------------------------------------------------------------------------------------------------------------------------------------------------------------------------------------------------------------------------------------------------------------------------------------------------------------------------------------------------------------------------------------------------------------------------------------------------------------------------------------------------------------------------|
| <div>Année</div> <div><div>V1 self.InRange(1900, dateEntree.Value.Year)    self==1799</div><div>M1 L'année doit être entre 1900 e maintenant</div></div>                                                                       | <div>NUMERIC: INTEGER</div> <div>anneeMC</div> <div></div> <div></div> <div>SPECIAL VALUES</div> <div>1799<div>Ne sait pas</div></div>                                                                                                                                                                                                                                                                                                                                                                                                                                                                                                                                                                                                                                                                                                                                                             |
| <div>Mois</div> <div><div>E IsAnswered(anneeMC) &amp;&amp; anneeMC!=1799</div></div>                                                                                                                                           | <div>SINGLE-SELECT</div> <div>moisMC</div> <div><div>01<div><input type="radio"/> Janvier</div></div><div>02<div><input type="radio"/> Février</div></div><div>03<div><input type="radio"/> Mars</div></div><div>04<div><input type="radio"/> Avril</div></div><div>05<div><input type="radio"/> Mai</div></div><div>06<div><input type="radio"/> Juin</div></div><div>07<div><input type="radio"/> Juillet</div></div><div>08<div><input type="radio"/> Août</div></div><div>09<div><input type="radio"/> Septembre</div></div><div>10<div><input type="radio"/> Octobre</div></div><div>11<div><input type="radio"/> Novembre</div></div><div>12<div><input type="radio"/> Décembre</div></div><div>99<div><input type="radio"/> Ne sait pas</div></div></div>                                                                                                                                   |
| <div>Jour</div> <div><div>F (@optioncode==30 &amp;&amp; moisMC!=2)    (@optioncode==31 &amp;&amp; moisMC.InList(1,3,5,7,8,10,12))    @optioncode.InRange(1,29)    @optioncode==99</div><div>E moisMC.InRange(1,12)</div></div> | <div>SINGLE-SELECT</div> <div>jourMC</div> <div><div>01<div><input type="radio"/> 1</div></div><div>02<div><input type="radio"/> 2</div></div><div>03<div><input type="radio"/> 3</div></div><div>04<div><input type="radio"/> 4</div></div><div>05<div><input type="radio"/> 5</div></div><div>06<div><input type="radio"/> 6</div></div><div>07<div><input type="radio"/> 7</div></div><div>08<div><input type="radio"/> 8</div></div><div>09<div><input type="radio"/> 9</div></div><div>10<div><input type="radio"/> 10</div></div><div>11<div><input type="radio"/> 11</div></div><div>12<div><input type="radio"/> 12</div></div><div>13<div><input type="radio"/> 13</div></div><div>14<div><input type="radio"/> 14</div></div><div>15<div><input type="radio"/> 15</div></div><div>16<div><input type="radio"/> 16</div></div></div> <div><a href="#">And 16 other symbols [15]</a></div> |

|                                                                                                                   |                                                                                                                                                                                                                                                                                                                                                                                                                                                                                                                                                                                                                                                                                                                                                                                                                |
|-------------------------------------------------------------------------------------------------------------------|----------------------------------------------------------------------------------------------------------------------------------------------------------------------------------------------------------------------------------------------------------------------------------------------------------------------------------------------------------------------------------------------------------------------------------------------------------------------------------------------------------------------------------------------------------------------------------------------------------------------------------------------------------------------------------------------------------------------------------------------------------------------------------------------------------------|
| Choisissez le niveau de handicap du à votre maladie                                                               | <div>SINGLE-SELECThandicapMC</div> <div><div>01</div><div><input type="radio"/> Incapacité à réaliser les activités vitales (manger, faire sa toilette)</div></div> <div><div>02</div><div><input type="radio"/> Incapacité à réaliser les activités du quotidien (préparer les repas, confectionner des outils, garder les animaux...)</div></div> <div><div>03</div><div><input type="radio"/> Incapacité à maintenir une activité professionnelle ou la scolarisation (champs, ateliers école, service...)</div></div> <div><div>04</div><div><input type="radio"/> Incapacité à continuer des loisirs (activités sportives, loisirs...)</div></div> <div><div>05</div><div><input type="radio"/> Autres limitations</div></div> <div><div>06</div><div><input type="radio"/> Aucune limitation</div></div> |
| Nom du répondant                                                                                                  | <div>SINGLE-SELECT: LINKEDrepondantMaladies</div> <div>SOURCE OF CATEGORIES: ROSTER <a href="#">MEMBRE</a></div>                                                                                                                                                                                                                                                                                                                                                                                                                                                                                                                                                                                                                                                                                               |
| I (Si la personne n'est pas dans la liste, retournez a la [liste des membres](membres) e ajoutez cette personne!) |                                                                                                                                                                                                                                                                                                                                                                                                                                                                                                                                                                                                                                                                                                                                                                                                                |
|                                                                                                                   |                                                                                                                                                                                                                                                                                                                                                                                                                                                                                                                                                                                                                                                                                                                                                                                                                |
|                                                                                                                   |                                                                                                                                                                                                                                                                                                                                                                                                                                                                                                                                                                                                                                                                                                                                                                                                                |

MORBIDITÉ

Roster: MALADIES AIGÜES

generated by list question [membres](#)

E autreMaladie==1

aigue

|                                               |                                |
|-----------------------------------------------|--------------------------------|
| Noms des maladies aiguës                      | <div>LISTnomMaladieAigue</div> |
| I Ecrire NSP si %aigue% ne connaît pas le nom | <div>.....</div>               |

MORBIDITÉ / MALADIES AIGÜES

Roster: MALADIE

generated by list question [nomMaladieAigue](#)

r\_aigue

|                                                                 |                                                                 |
|-----------------------------------------------------------------|-----------------------------------------------------------------|
| Verifiez le nom de la maladie e ecrivez le nom en francais      | <div>TEXTmaladieAigueVerifie</div> <div>SCOPE: SUPERVISOR</div> |
| I ecrivez NSP si vous ne savez pas.                             | <div>.....</div>                                                |
| VARIABLE<br>nomMaladieAigue[@rowcode-1].ToString().Substring(5) | <div>STRINGnomMA</div>                                          |

MORBIDITÉ / MALADIES AIGÜES / MALADIE

Roster: SYMPTÔME

generated by fixed list

r\_symptomesMA

- 01 1
- 02 2
- 03 3
- 04 4

05 5  
06 6

Quels symptômes avez-vous ressenti au cours de cette maladie?

I Marguez "NON APPLICABLE" s'il n y a plus de symptômes

SINGLE-SELECT: COMBO BOX

symptomsMA

00

☐ NON APPLICABLE

01

☐ Abcès

02

☐ Anémie

03

☐ Bouche fermée, crispée

04

☐ Boutons

05

☐ Boutons sur tout le corps

06

☐ Constipation

07

☐ Convulsions

08

☐ Corps chaud

09

☐ Corps enflé (œdème général )

10

☐ Coup rejeté en arrière

11

☐ Démangeaisons (prurit)

12

☐ Déshydratation

13

☐ Diarrhée aigue

14

☐ Diarrhée chronique

15

☐ Difficultés à respirer (dyspnée)

[And 63 other symbols \[20\]](#)

Selectionnez la maladie

SINGLE-SELECT: COMBO BOXcodeMaladieAigue

200

Maladies ou infections pulm  
onaires aiguës (poumons)

201

Bronchiolite

202

Bronchite

203

Pneumonie

204

Maladies ou infections respi  
ratoires hautes aiguës (gorg  
e, nez, oreilles)

205

Coqueluche

206

Grippe

207

Infections de la gorge (laryn  
gite, angine ...)

208

Infections de l'oreille (otites,  
...)

209

Infections du nez

210

Oreillons

211

Rhume

212

Maladies ou infections ocula  
ires aiguës (œil)

213

Conjonctivite à chlamydiae a  
ppelée 'Apollo'

214

Conjonctivite aigue

215

Trachome

[And 66 other symbols \[16\]](#)

Qui vous a dit le nom de votre maladie ?

```
E nomMaladieAigue[@rowcode-1].ToString().ToUpper() != (@rowcode + " -> " + "NSP") /* don't show question for listentries "nsp", "NSP", etc. so it gets a N/A value automatically */
```

SINGLE-SELECTsourceNomAigue

01

Evident (par exemple dans l  
e cas d'un accident)

02

Mère ou père

03

Personnel de santé

04

Autres personnes

05

Moi-même

06

Ne sait pas

```
VARIABLE  
new string[] {"EVI", "MPD", "PDS", "AUP", "MOM", "NSP", "NAP"}  
[(int) sourceNomAigue-1]
```

STRINGcodeSourceEMA

STATIC TEXT

À quelle date a débuté votre maladie ?

|                                                                                                                                                                                                                                |                                                                                                                                                                                                                                                                                                                                                                                                                                                                                                                                                                                                                                                                                       |
|--------------------------------------------------------------------------------------------------------------------------------------------------------------------------------------------------------------------------------|---------------------------------------------------------------------------------------------------------------------------------------------------------------------------------------------------------------------------------------------------------------------------------------------------------------------------------------------------------------------------------------------------------------------------------------------------------------------------------------------------------------------------------------------------------------------------------------------------------------------------------------------------------------------------------------|
| <div>Année</div> <div><div>V1 self.InRange(1900, dateEntree.Value.Year)    self==1799</div><div>M1 L'année doit être entre 1900 e maintenant</div></div>                                                                       | <div>NUMERIC: INTEGERanneeMA</div> <div></div> <div>SPECIAL VALUES</div> <div>1799Ne sait pas</div>                                                                                                                                                                                                                                                                                                                                                                                                                                                                                                                                                                                   |
| <div>Mois</div> <div><div>E IsAnswered(anneeMA) &amp;&amp; anneeMA!=1799</div></div>                                                                                                                                           | <div>SINGLE-SELECTmoisMA</div> <div><div>01<input type="radio"/>Janvier</div><div>02<input type="radio"/>Février</div><div>03<input type="radio"/>Mars</div><div>04<input type="radio"/>Avril</div><div>05<input type="radio"/>Mai</div><div>06<input type="radio"/>Juin</div><div>07<input type="radio"/>Juillet</div><div>08<input type="radio"/>Août</div><div>09<input type="radio"/>Septembre</div><div>10<input type="radio"/>Octobre</div><div>11<input type="radio"/>Novembre</div><div>12<input type="radio"/>Décembre</div><div>99<input type="radio"/>Ne sait pas</div></div>                                                                                              |
| <div>Jour</div> <div><div>F (@optioncode==30 &amp;&amp; moisMA!=2)    (@optioncode==31 &amp;&amp; moisMA.InList(1,3,5,7,8,10,12))    @optioncode.InRange(1,29)    @optioncode==99</div><div>E moisMA.InRange(1,12)</div></div> | <div>SINGLE-SELECTjourMA</div> <div><div>01<input type="radio"/>1</div><div>02<input type="radio"/>2</div><div>03<input type="radio"/>3</div><div>04<input type="radio"/>4</div><div>05<input type="radio"/>5</div><div>06<input type="radio"/>6</div><div>07<input type="radio"/>7</div><div>08<input type="radio"/>8</div><div>09<input type="radio"/>9</div><div>10<input type="radio"/>10</div><div>11<input type="radio"/>11</div><div>12<input type="radio"/>12</div><div>13<input type="radio"/>13</div><div>14<input type="radio"/>14</div><div>15<input type="radio"/>15</div><div>16<input type="radio"/>16</div><div><a href="#">And 16 other symbols [17]</a></div></div> |
| <div>Aujourd'hui, vos symptômes sont-ils terminés?</div>                                                                                                                                                                       | <div>SINGLE-SELECTsymptomsCrisesMatermines</div> <div><div>01<input type="radio"/>Oui</div><div>02<input type="radio"/>Non</div></div>                                                                                                                                                                                                                                                                                                                                                                                                                                                                                                                                                |

STATIC TEXT

E symptomsCrisesMatermines==1

À quelle date vos symptômes ont-ils cessé?

|                                                                                                                                                                                                                                                       |                                                                                                                                                                                                                                                                                                                                                                                                                                                                                                                                                                                                                                                                                                                                                   |
|-------------------------------------------------------------------------------------------------------------------------------------------------------------------------------------------------------------------------------------------------------|---------------------------------------------------------------------------------------------------------------------------------------------------------------------------------------------------------------------------------------------------------------------------------------------------------------------------------------------------------------------------------------------------------------------------------------------------------------------------------------------------------------------------------------------------------------------------------------------------------------------------------------------------------------------------------------------------------------------------------------------------|
| <div>Année</div> <div>E symptomsCrisesMatermines==1</div> <div>V1 self.InRange(1900, dateEntree.Value.Year)    self==1799</div> <div>M1 L'année doit être entre 1900 e 2018</div>                                                                     | <div>NUMERIC: INTEGER</div> <div>anneeCrisesMACesse</div> <div><div></div></div> <div>SPECIAL VALUES</div> <div>1799 Ne sait pas</div>                                                                                                                                                                                                                                                                                                                                                                                                                                                                                                                                                                                                            |
| <div>Mois</div> <div>E IsAnswered(anneeCrisesMACesse) &amp;&amp; anneeCrisesMACesse!=1799</div>                                                                                                                                                       | <div>SINGLE-SELECT</div> <div>moisCrisesMACesse</div> <div>01 <input type="radio"/> Janvier</div> <div>02 <input type="radio"/> Février</div> <div>03 <input type="radio"/> Mars</div> <div>04 <input type="radio"/> Avril</div> <div>05 <input type="radio"/> Mai</div> <div>06 <input type="radio"/> Juin</div> <div>07 <input type="radio"/> Juillet</div> <div>08 <input type="radio"/> Août</div> <div>09 <input type="radio"/> Septembre</div> <div>10 <input type="radio"/> Octobre</div> <div>11 <input type="radio"/> Novembre</div> <div>12 <input type="radio"/> Décembre</div> <div>99 <input type="radio"/> Ne sait pas</div>                                                                                                        |
| <div>Jour</div> <div>F (@optioncode==30 &amp;&amp; moisCrisesMACesse!=2)    (@optioncode==31 &amp;&amp; moisCrisesMACesse.InList(1,3,5,7,8,10,12))    @optioncode.InRange(1,29)    @optioncode==99</div> <div>E moisCrisesMACesse.InRange(1,12)</div> | <div>SINGLE-SELECT</div> <div>jourCrisesMACesse</div> <div>01 <input type="radio"/> 1</div> <div>02 <input type="radio"/> 2</div> <div>03 <input type="radio"/> 3</div> <div>04 <input type="radio"/> 4</div> <div>05 <input type="radio"/> 5</div> <div>06 <input type="radio"/> 6</div> <div>07 <input type="radio"/> 7</div> <div>08 <input type="radio"/> 8</div> <div>09 <input type="radio"/> 9</div> <div>10 <input type="radio"/> 10</div> <div>11 <input type="radio"/> 11</div> <div>12 <input type="radio"/> 12</div> <div>13 <input type="radio"/> 13</div> <div>14 <input type="radio"/> 14</div> <div>15 <input type="radio"/> 15</div> <div>16 <input type="radio"/> 16</div> <div><a href="#">And 16 other symbols [18]</a></div> |
| <div>Qui a répondu ces questions?</div>                                                                                                                                                                                                               | <div>SINGLE-SELECT: LINKED</div> <div>SOURCE OF CATEGORIES: ROSTER <a href="#">MEMBRE</a></div> <div>repondantMaigues</div>                                                                                                                                                                                                                                                                                                                                                                                                                                                                                                                                                                                                                       |

Roster: SÉVÉRITÉ DU PROBLÈME DE SANTÉ

generated by list question [membres](#)

r\_soins

E (maladieChronique==1) || autreMaladie==1

| VARIABLE<br>@rowcode                                                                                                        | LONG                                                                                                                                                                                                                                                                                                                                                                                                                                                                                                                                                                                                                                                | ixMembre                |
|-----------------------------------------------------------------------------------------------------------------------------|-----------------------------------------------------------------------------------------------------------------------------------------------------------------------------------------------------------------------------------------------------------------------------------------------------------------------------------------------------------------------------------------------------------------------------------------------------------------------------------------------------------------------------------------------------------------------------------------------------------------------------------------------------|-------------------------|
| Lorsque vous étiez malade, avez-vous cru que vous alliez mourir?<br><br>E /* (bool) termineesA */ true                      | SINGLE-SELECT<br><br>01 <input type="radio"/> Oui<br>02 <input type="radio"/> Non                                                                                                                                                                                                                                                                                                                                                                                                                                                                                                                                                                   | peurMourirA             |
| Choisissez parmi les propositions suivantes le degré de sévérité de votre maladie                                           | SINGLE-SELECT<br><br>06 <input type="radio"/> Incapacité à réaliser les activités vitales (manger, téter pour les enfants en bas âge, faire sa toilette)<br>05 <input type="radio"/> Incapacité à réaliser les activités du quotidien (préparer les repas, confectionner des outils, garder les animaux...)<br>04 <input type="radio"/> Incapacité à maintenir une activité professionnelle ou la scolarisation (champs, ateliers, école, service...)<br>03 <input type="radio"/> Incapacité à continuer des loisirs (activités sportives, loisirs...)<br>02 <input type="radio"/> Autres limitations<br>01 <input type="radio"/> Aucune limitation | severiteMA              |
| Votre maladie vous a-t-elle empêché de mener à bien vos activités quotidiennes ?<br><br>E age>=6                            | SINGLE-SELECT<br><br>01 <input type="radio"/> Oui<br>02 <input type="radio"/> Non                                                                                                                                                                                                                                                                                                                                                                                                                                                                                                                                                                   | empecheActivitesMA      |
| Combien de temps?<br><br>E empecheActivitesMA==1<br>V1 self<40    self.InList(99,97)<br>M1 Impossible! C'est trop de temps. | NUMERIC: INTEGER<br><br>-----<br><br>SPECIAL VALUES<br>99 Ne sait pas<br>97 Non applicable                                                                                                                                                                                                                                                                                                                                                                                                                                                                                                                                                          | tempsEmpecheActivitesMA |
| %tempsEmpecheActivitesMA% Heures ou Jours ?<br><br>E tempsEmpecheActivitesMA<40                                             | SINGLE-SELECT<br><br>01 <input type="radio"/> Heures<br>02 <input type="radio"/> Jours                                                                                                                                                                                                                                                                                                                                                                                                                                                                                                                                                              | unit3A                  |
| Votre maladie vous a-t-elle empêché d'aller à l'école?<br><br>E age>=6 && statutOccupation==5                               | SINGLE-SELECT<br><br>01 <input type="radio"/> Oui<br>02 <input type="radio"/> Non                                                                                                                                                                                                                                                                                                                                                                                                                                                                                                                                                                   | empecheEcoleMA          |

|                                                                                                                                                                      |                                                                                                                                                                                 |
|----------------------------------------------------------------------------------------------------------------------------------------------------------------------|---------------------------------------------------------------------------------------------------------------------------------------------------------------------------------|
| <div>Combien de temps?</div> <div>E empecheEcoleMA==1</div> <div>V1 self&lt;40    self.InList(99,97)</div> <div>M1 Impossible! C'est trop de temps.</div>            | <div>NUMERIC: INTEGER<div>tempsEmpecheEcoleMA</div></div> <div>-----</div> <div>SPECIAL VALUES</div> <div>99<div>Ne sait pas</div></div> <div>97<div>Non applicable</div></div> |
| <div>%tempsEmpecheEcoleMA% Heures ou Jours?</div> <div>E tempsEmpecheEcoleMA&lt;40</div>                                                                             | <div>SINGLE-SELECT<div>unit4A</div></div> <div>01<div><input type="radio"/> Heures</div></div> <div>02<div><input type="radio"/> Jours</div></div>                              |
| <div>Qui a répondu ces questions?</div> <div>I (Si la personne n'est pas dans la liste, retournez a la [liste des membres](membres) e ajoutez cette personne!)</div> | <div>SINGLE-SELECT: LINKED<div>repondantSoins</div></div> <div>SOURCE OF CATEGORIES: ROSTER <a href="#">MEMBRE</a></div>                                                        |

|                                                                                                                                                                          |                           |
|--------------------------------------------------------------------------------------------------------------------------------------------------------------------------|---------------------------|
| <div>MORBIDITÉ</div> <div>Roster: EXAMEN PHYSIQUE - %ROSTERTITLE%</div> <div>generated by list question <a href="#">membres</a></div> <div>E residence.InList(1,2)</div> | <div>examenPhysique</div> |
|--------------------------------------------------------------------------------------------------------------------------------------------------------------------------|---------------------------|

|                                                                                                                                                                            |                            |
|----------------------------------------------------------------------------------------------------------------------------------------------------------------------------|----------------------------|
| <div>MORBIDITÉ / EXAMEN PHYSIQUE - %ROSTERTITLE%</div> <div>Roster: ANTHROPOMETRY</div> <div>generated by fixed list</div> <div>01 1</div> <div>02 2</div> <div>03 3</div> | <div>peAnthropometry</div> |
|----------------------------------------------------------------------------------------------------------------------------------------------------------------------------|----------------------------|

|                        |                                                                 |
|------------------------|-----------------------------------------------------------------|
| <div>Weight (kg)</div> | <div>NUMERIC: DECIMAL<div>peweight</div></div> <div>-----</div> |
| <div>Height (cm)</div> | <div>NUMERIC: DECIMAL<div>peHeight</div></div> <div>-----</div> |
| <div>Waste (cm)</div>  | <div>NUMERIC: DECIMAL<div>peWaste</div></div> <div>-----</div>  |
| <div>Hip (cm)</div>    | <div>NUMERIC: DECIMAL<div>peHip</div></div> <div>-----</div>    |

|                                                                                                                                                                                                                  |                     |
|------------------------------------------------------------------------------------------------------------------------------------------------------------------------------------------------------------------|---------------------|
| <div>MORBIDITÉ</div> <div>Roster: PHYSICAL EXAMINATION - %ROSTERTITLE%</div> <div>generated by list question <a href="#">membres</a></div> <div>E false /* ...for now: email Rainer Sauerborn 10.5.2022 */</div> | <div>physExam</div> |
|------------------------------------------------------------------------------------------------------------------------------------------------------------------------------------------------------------------|---------------------|

|                                                                                                                  |  |
|------------------------------------------------------------------------------------------------------------------|--|
| <div>MORBIDITÉ / PHYSICAL EXAMINATION - %ROSTERTITLE%</div> <div>PHYSICAL EXAMINATION</div> <div>E !\$P1P2</div> |  |
|------------------------------------------------------------------------------------------------------------------|--|

|                                                                                                                                                                                                       |                                          |
|-------------------------------------------------------------------------------------------------------------------------------------------------------------------------------------------------------|------------------------------------------|
| Body temperature (°C)<br>V1 self.InRange(35,42.9)<br>M1 This cannot be the body temperature in degrees Celsius!                                                                                       | NUMERIC: DECIMAL<br>peTemp<br>-----      |
| Tap to record time of measurement                                                                                                                                                                     | DATE: CURRENT TIME<br>peTimeBP1<br>----- |
| Systolic blood pressure (mmHg)                                                                                                                                                                        | NUMERIC: INTEGER<br>pePsyst1<br>-----    |
| Diastolic blood pressure (mmHg)                                                                                                                                                                       | NUMERIC: INTEGER<br>pePdiast1<br>-----   |
| Pulse                                                                                                                                                                                                 | NUMERIC: INTEGER<br>pePulse1<br>-----    |
| VARIABLE<br>5                                                                                                                                                                                         | DOUBLE<br>peBPinterval1                  |
| VARIABLE<br>/* (int) peBPinterval - (peTimeBP2 - peTimeBP1.Value.AddMinutes((double) peBPinterval)).Value.Minutes */ (int) peBPinterval - (peTimeBP2 - peTimeBP1).Value.Minutes                       | LONG<br>peBPelapsed2                     |
| STATIC TEXT<br>Wait for %peBPinterval% minutes before continuing...                                                                                                                                   |                                          |
| Tap to record time of 2nd measurement<br>V1 peTimeBP1.Value.AddMinutes((double) peBPinterval) < self<br>M1 Allow for %peBPinterval% minutes between measurements! Try again in %peBPelapsed2% minutes | DATE: CURRENT TIME<br>peTimeBP2<br>----- |
| Systolic blood pressure (mmHg)<br>E peTimeBP1.Value.AddMinutes((double) peBPinterval) < peTimeBP2                                                                                                     | NUMERIC: INTEGER<br>pePsyst2<br>-----    |
| Diastolic blood pressure (mmHg)<br>E peTimeBP1.Value.AddMinutes((double) peBPinterval) < peTimeBP2                                                                                                    | NUMERIC: INTEGER<br>pePdiast2<br>-----   |
| Pulse<br>E peTimeBP1.Value.AddMinutes((double) peBPinterval) < peTimeBP2                                                                                                                              | NUMERIC: INTEGER<br>pePulse2<br>-----    |
| VARIABLE<br>(int) peBPinterval - (peTimeBP3 - peTimeBP2).Value.Minutes                                                                                                                                | LONG<br>peBPelapsed3                     |
| STATIC TEXT<br>E peTimeBP1.Value.AddMinutes((double) peBPinterval) < peTimeBP2<br>Wait for %peBPinterval% minutes before continuing...                                                                |                                          |

|                                                                                                                                                                                                                                                                                                                   |                                                                                                                          |
|-------------------------------------------------------------------------------------------------------------------------------------------------------------------------------------------------------------------------------------------------------------------------------------------------------------------|--------------------------------------------------------------------------------------------------------------------------|
| <div>Tap to record time of 3rd measurement</div> <div>E peTimeBP1.Value.AddMinutes((double) peBPinterval) &lt; peTimeBP2</div> <div>V1 peTimeBP2.Value.AddMinutes((double) peBPinterval) &lt; self</div> <div>M1 Allow for %peBPinterval% minutes between measurements! Try again in %peBPelapsed3% minutes</div> | <div>DATE: CURRENT TIMEpeTimeBP3</div> <div></div>                                                                       |
| <div>Systolic blood pressure (mmHg)</div> <div>E peTimeBP2.Value.AddMinutes((double) peBPinterval) &lt; peTimeBP3</div>                                                                                                                                                                                           | <div>NUMERIC: INTEGERpePsyst3</div> <div></div>                                                                          |
| <div>Diastolic blood pressure (mmHg)</div> <div>E peTimeBP2.Value.AddMinutes((double) peBPinterval) &lt; peTimeBP3</div>                                                                                                                                                                                          | <div>NUMERIC: INTEGERpePdiast3</div> <div></div>                                                                         |
| <div>Pulse</div> <div>E peTimeBP2.Value.AddMinutes((double) peBPinterval) &lt; peTimeBP3</div>                                                                                                                                                                                                                    | <div>NUMERIC: INTEGERpePulse3</div> <div></div>                                                                          |
| STATIC TEXT                                                                                                                                                                                                                                                                                                       |                                                                                                                          |
| <i>ANTHROPOMETRY section was here originally</i>                                                                                                                                                                                                                                                                  |                                                                                                                          |
| <div>Fasting plasma glucose (FPG) [mmol/L]</div>                                                                                                                                                                                                                                                                  | <div>NUMERIC: INTEGERpeFPG</div> <div></div>                                                                             |
| <div>Glycated hemoglobin HbA1c [mmol/mol]</div>                                                                                                                                                                                                                                                                   | <div>NUMERIC: INTEGERpeHbA1c</div> <div></div>                                                                           |
| <div>Hemoglobin (Hb) [g/dL]</div>                                                                                                                                                                                                                                                                                 | <div>NUMERIC: INTEGERpeHb</div> <div></div>                                                                              |
| STATIC TEXT                                                                                                                                                                                                                                                                                                       |                                                                                                                          |
| <i>Malaria rapid diagnostic test (RDT)</i>                                                                                                                                                                                                                                                                        |                                                                                                                          |
| <div>pan-Lactatdehydrogenase (pLDH)</div>                                                                                                                                                                                                                                                                         | <div>SINGLE-SELECTpepLDH</div> <div>01 <input type="radio"/> negative</div> <div>02 <input type="radio"/> positive</div> |
| <div>HRP2</div>                                                                                                                                                                                                                                                                                                   | <div>SINGLE-SELECTpeHRP2</div> <div>01 <input type="radio"/> negative</div> <div>02 <input type="radio"/> positive</div> |
| STATIC TEXT                                                                                                                                                                                                                                                                                                       |                                                                                                                          |
| <i>Malaria microscopy</i>                                                                                                                                                                                                                                                                                         |                                                                                                                          |
| <div>Malaria parasite count (MPC) per 200 white blood cells (WBC)<br/>Thick film No. 1</div>                                                                                                                                                                                                                      | <div>TEXTpeMPC1</div> <div></div>                                                                                        |
| <div>Malaria parasite count (MPC) per 200 white blood cells (WBC)<br/>Thick film No. 2</div>                                                                                                                                                                                                                      | <div>TEXTpeMPC2</div> <div></div>                                                                                        |

|                    |                                                                                                                                                                                                                                                                                                                                                                           |              |
|--------------------|---------------------------------------------------------------------------------------------------------------------------------------------------------------------------------------------------------------------------------------------------------------------------------------------------------------------------------------------------------------------------|--------------|
| Plasmodium species | <div>SINGLE-SELECT</div> <div><div>01</div><div><input type="radio"/> P. falciparum</div></div> <div><div>02</div><div><input type="radio"/> P. malariae</div></div> <div><div>03</div><div><input type="radio"/> P. ovale</div></div> <div><div>04</div><div><input type="radio"/> P. vivax</div></div> <div><div>09</div><div><input type="radio"/> Unknown</div></div> | pePlasmodium |
|--------------------|---------------------------------------------------------------------------------------------------------------------------------------------------------------------------------------------------------------------------------------------------------------------------------------------------------------------------------------------------------------------------|--------------|

# AGRICULTURE AUX CHAMPS

E \$OK && \$P1P2

STATIC TEXT

Les travailleurs sur les champs

AGRICULTURE AUX CHAMPS

Roster: ÉPOUSE

generated by list question membres

epouses

E parente.InList(3108,1720)

|                                                                                                                                                                                                   |                                                                                                                                                                                                                                                                      |
|---------------------------------------------------------------------------------------------------------------------------------------------------------------------------------------------------|----------------------------------------------------------------------------------------------------------------------------------------------------------------------------------------------------------------------------------------------------------------------|
| <p>Votre épouse %rostartitle% vous accompagne-t-elle aux champs ?</p>                                                                                                                             | <p>SINGLE-SELECT QA14</p> <p>01 <input type="radio"/> Oui</p> <p>00 <input type="radio"/> Non</p>                                                                                                                                                                    |
| <p>Pour faire quels travaux spécifiquement ?</p> <p>E QA14==1</p>                                                                                                                                 | <p>MULTI-SELECT QA15</p> <p>01 <input type="checkbox"/> Préparer les champs</p> <p>02 <input type="checkbox"/> semer</p> <p>03 <input type="checkbox"/> Désherber=cultiver</p> <p>04 <input type="checkbox"/> Récolter</p> <p>09 <input type="checkbox"/> Autres</p> |
| <p>Autre travail a preciser</p> <p>E QA15.Contains(9)</p>                                                                                                                                         | <p>TEXT QA15_autre</p> <p>.....</p>                                                                                                                                                                                                                                  |
| <p>Combien de personnes qui travaillent dans votre champ sont des membres de votre ménage ?</p> <p>V1 QA17&lt;=membres.Length</p> <p>M1 C'est plus que le nombre de personnes dans le ménage!</p> | <p>NUMERIC: INTEGER QA17</p> <p>.....</p>                                                                                                                                                                                                                            |
| <p>Parmi ceux, combien sont des femmes ?</p> <p>V1 self &lt;= QA17</p> <p>M1 le nombre de femmes ne peut pas être supérieur au nombre total des membres du ménage travaillant dans le champs!</p> | <p>NUMERIC: INTEGER QA18</p> <p>.....</p>                                                                                                                                                                                                                            |
| <p>Combien d'ouvriers journaliers travaillent dans vos champs ?</p> <p>V1 self&lt;=100</p> <p>M1 le nombre de personne doit être inférieur ou égal à 100</p>                                      | <p>NUMERIC: INTEGER QA16</p> <p>.....</p>                                                                                                                                                                                                                            |
| <p>STATIC TEXT</p>                                                                                                                                                                                |                                                                                                                                                                                                                                                                      |
| <p>Quels des dispositifs agricoles suivants le ménage possède?</p>                                                                                                                                |                                                                                                                                                                                                                                                                      |
| <p>Nombre de Faucheuse</p> <p>V1 self&lt;100</p> <p>M1 le nombre de Faucheuse doit être compris entre 0 à 99</p>                                                                                  | <p>NUMERIC: INTEGER nbreFaucheuse</p> <p>.....</p> <p>SPECIAL VALUES</p> <p>99 Néant</p>                                                                                                                                                                             |

|                                                                                                                                     |                                                                                                         |
|-------------------------------------------------------------------------------------------------------------------------------------|---------------------------------------------------------------------------------------------------------|
| <p>Nombre de <b>Coupe-coupe</b></p> <p>V1 self&lt;100</p> <p>M1 le nombre de Coupe-coupe doit etre compris entre 0 a 99</p>         | <p>NUMERIC: INTEGER <span>nbreCoupe</span></p> <p>-----</p> <p>SPECIAL VALUES</p> <p>99 Néant</p>       |
| <p>Nombre de <b>Grand Chariot</b></p> <p>V1 self&lt;100</p> <p>M1 Le nombre de Grand Chariot doit etre compris entre 0 a 99</p>     | <p>NUMERIC: INTEGER <span>nbreGrandChario</span></p> <p>-----</p> <p>SPECIAL VALUES</p> <p>99 Néant</p> |
| <p>Nombre de <b>petite Chariot</b></p> <p>V1 self&lt;100</p> <p>M1 Le nombre de petit Chariot doit etre compris entre 0 a 99</p>    | <p>NUMERIC: INTEGER <span>nbrPetitChariot</span></p> <p>-----</p> <p>SPECIAL VALUES</p> <p>99 Néant</p> |
| <p>Nombre de <b>Outils de mains</b></p> <p>V1 self&lt;100</p> <p>M1 Le nombre de outil de mains doit etre comprise entre 0 a 99</p> | <p>NUMERIC: INTEGER <span>nbreOutilMain</span></p> <p>-----</p> <p>SPECIAL VALUES</p> <p>99 Néant</p>   |
| <p>Nombre de <b>Tracteur</b></p> <p>V1 self&lt;100</p> <p>M1 le nombre de tracteur doit etre compris entre 0 a 99</p>               | <p>NUMERIC: INTEGER <span>nbreTracteur</span></p> <p>-----</p> <p>SPECIAL VALUES</p> <p>99 Néant</p>    |
| <p>Nombre de <b>Charrues</b></p> <p>V1 self&lt;100</p> <p>M1 le nombre de Charrue doit etre comprise entre 0 a 99</p>               | <p>NUMERIC: INTEGER <span>nbreCharrue</span></p> <p>-----</p> <p>SPECIAL VALUES</p> <p>99 Néant</p>     |
| <p>Nombre de <b>Houe</b></p> <p>V1 self&lt;100</p> <p>M1 le nombre de Houe doit etre compris entre 0 a 99</p>                       | <p>NUMERIC: INTEGER <span>nbreHoue</span></p> <p>-----</p> <p>SPECIAL VALUES</p> <p>99 Néant</p>        |
| <p>Nombre de <b>Bœuf(s) de traction</b></p> <p>V1 self&lt;100</p> <p>M1 le nombre de Boeuf doit etre compris entre 0 a 99</p>       | <p>NUMERIC: INTEGER <span>NbreBoeuf</span></p> <p>-----</p> <p>SPECIAL VALUES</p> <p>99 Néant</p>       |

STATIC TEXT

De la récolte en 2019 ...

|                                                                                                                                      |                                                                                                                                                                                                                                                                                                                                                                                                                                                                                                                |
|--------------------------------------------------------------------------------------------------------------------------------------|----------------------------------------------------------------------------------------------------------------------------------------------------------------------------------------------------------------------------------------------------------------------------------------------------------------------------------------------------------------------------------------------------------------------------------------------------------------------------------------------------------------|
| <p>Avez-vous pu nourrir votre famille avec les récoltes de votre champs (greniers) toute l'année?</p>                                | <p>SINGLE-SELECT QA31</p> <p>01 <input type="radio"/> Oui</p> <p>00 <input type="radio"/> Non</p>                                                                                                                                                                                                                                                                                                                                                                                                              |
| <p>Jusqu'à quel mois de l'année avez-vous pu nourrir votre famille avec les récoltes de votre champs (greniers)</p> <p>E QA31==0</p> | <p>SINGLE-SELECT QA32</p> <p>01 <input type="radio"/> Janvier</p> <p>02 <input type="radio"/> Fevrier</p> <p>03 <input type="radio"/> Mars</p> <p>04 <input type="radio"/> Avril</p> <p>05 <input type="radio"/> Mai</p> <p>06 <input type="radio"/> Juin</p> <p>07 <input type="radio"/> Juillet</p> <p>08 <input type="radio"/> Aout</p> <p>09 <input type="radio"/> Septembre</p> <p>10 <input type="radio"/> Octobre</p> <p>11 <input type="radio"/> Novembre</p> <p>12 <input type="radio"/> Decembre</p> |
| <p>Avez-vous dû acheter des céréales complémentaires pour nourrir votre famille ?</p> <p>E QA31==0</p>                               | <p>SINGLE-SELECT QA33</p> <p>01 <input type="radio"/> Oui</p> <p>00 <input type="radio"/> Non</p>                                                                                                                                                                                                                                                                                                                                                                                                              |
| <p>A partir de quel mois avez-vous dû acheter des céréales complémentaires</p> <p>E QA33==1</p>                                      | <p>SINGLE-SELECT QA34</p> <p>01 <input type="radio"/> Janvier</p> <p>02 <input type="radio"/> Fevrier</p> <p>03 <input type="radio"/> Mars</p> <p>04 <input type="radio"/> Avril</p> <p>05 <input type="radio"/> Mai</p> <p>06 <input type="radio"/> Juin</p> <p>07 <input type="radio"/> Juillet</p> <p>08 <input type="radio"/> Aout</p> <p>09 <input type="radio"/> Septembre</p> <p>10 <input type="radio"/> Octobre</p> <p>11 <input type="radio"/> Novembre</p> <p>12 <input type="radio"/> Decembre</p> |

Quelles des cereales suivantes complementair  
e vous avez achete pour nourrir votre famille?

E QA33==1

MULTI-SELECT: YES/NO

QA35

- 01 ☐/ ☐ Sorgho
- 02 ☐/ ☐ Riz
- 03 ☐/ ☐ Fonio
- 04 ☐/ ☐ Mais
- 05 ☐/ ☐ Petit mil
- 06 ☐/ ☐ Blé
- 07 ☐/ ☐ Haricot
- 08 ☐/ ☐ Arachide
- 09 ☐/ ☐ soja
- 10 ☐/ ☐ Patate douce
- 11 ☐/ ☐ Igname
- 12 ☐/ ☐ Manioc
- 13 ☐/ ☐ Banane
- 14 ☐/ ☐ pomme de terre
- 15 ☐/ ☐ oseille/bissap
- 16 ☐/ ☐ sésame

[And 1 other symbols \[21\]](#)

AGRICULTURE AUX CHAMPS

Roster: DETAIL

generated by multi-select question [QA35](#)

r\_nouriture

Quel est la quantité de %r\_nouriture% que vou  
s avez achete?

NUMERIC: DECIMAL

QA36\_qtite\_kg

-----

V1 QA36\_qtite\_kg<=20000

M1 la quantité en kg semble etre tres eleve

Quel est l'unité de %rosteritle% achete par le  
menage?

SINGLE-SELECT

uniteCerealeAchete

- 01 ☐ Boîte de tomate
- 02 ☐ Tine
- 03 ☐ Sac grand (100kg)
- 04 ☐ Sac petit (50kg)
- 05 ☐ Kilogramme
- 06 ☐ Nombre

Quel est le prix de 1 %uniteCerealeAchete% de  
%r\_nouriture% que vous avez achete?

NUMERIC: INTEGER

QA36\_prix\_kg

-----

V1 /\* meaningless if unit can be kg or 100kg bags QA36\_prix  
\_kg<=2000 \*/ true

M1 le prix semble etre eleve

STATIC TEXT

*Attention: Dans cet enquête on demande seulement sur les cultures [de la campagne précédente!](#)*

|                                                                                                                                                                                                                                                                                                                                                                                        |                                                                                                                                                                                                                                                                                                                                                                                                                                                                                                                                                                                                                                                                                                                                                                                                                                                                                                                                                                                                                                                                                                                                                                                                                                                                                                                                                                                                                                                                                                                                                                                                                                                                                                                        |
|----------------------------------------------------------------------------------------------------------------------------------------------------------------------------------------------------------------------------------------------------------------------------------------------------------------------------------------------------------------------------------------|------------------------------------------------------------------------------------------------------------------------------------------------------------------------------------------------------------------------------------------------------------------------------------------------------------------------------------------------------------------------------------------------------------------------------------------------------------------------------------------------------------------------------------------------------------------------------------------------------------------------------------------------------------------------------------------------------------------------------------------------------------------------------------------------------------------------------------------------------------------------------------------------------------------------------------------------------------------------------------------------------------------------------------------------------------------------------------------------------------------------------------------------------------------------------------------------------------------------------------------------------------------------------------------------------------------------------------------------------------------------------------------------------------------------------------------------------------------------------------------------------------------------------------------------------------------------------------------------------------------------------------------------------------------------------------------------------------------------|
| <p>Votre menage a t-il cultivé les cultures suivantes<br/>a la campagne précédente?</p>                                                                                                                                                                                                                                                                                                | <p>MULTI-SELECT: YES/NO <span>QCS</span></p> <div> <div>01</div> <div><input type="checkbox"/>/ <input type="checkbox"/> Sorgho</div> </div> <div> <div>02</div> <div><input type="checkbox"/>/ <input type="checkbox"/> Petit mil</div> </div> <div> <div>03</div> <div><input type="checkbox"/>/ <input type="checkbox"/> Maïs</div> </div> <div> <div>04</div> <div><input type="checkbox"/>/ <input type="checkbox"/> Arachides</div> </div> <div> <div>05</div> <div><input type="checkbox"/>/ <input type="checkbox"/> Riz</div> </div> <div> <div>06</div> <div><input type="checkbox"/>/ <input type="checkbox"/> Oseille/bissap</div> </div> <div> <div>07</div> <div><input type="checkbox"/>/ <input type="checkbox"/> Blé</div> </div> <div> <div>08</div> <div><input type="checkbox"/>/ <input type="checkbox"/> Manioc</div> </div> <div> <div>09</div> <div><input type="checkbox"/>/ <input type="checkbox"/> Pommes de terre</div> </div> <div> <div>10</div> <div><input type="checkbox"/>/ <input type="checkbox"/> Cotton</div> </div> <div> <div>11</div> <div><input type="checkbox"/>/ <input type="checkbox"/> Sésame</div> </div> <div> <div>12</div> <div><input type="checkbox"/>/ <input type="checkbox"/> Fonio</div> </div> <div> <div>13</div> <div><input type="checkbox"/>/ <input type="checkbox"/> Haricots</div> </div> <div> <div>14</div> <div><input type="checkbox"/>/ <input type="checkbox"/> Petits poids</div> </div> <div> <div>15</div> <div><input type="checkbox"/>/ <input type="checkbox"/> Soja</div> </div> <div> <div>16</div> <div><input type="checkbox"/>/ <input type="checkbox"/> Patate douce</div> </div> <p><a href="#">And 3 other symbols [22]</a></p> |
| <p>Combien de champs votre ménage cultive-t-il ?</p> <p>I Un champ doit avoir: - une seule culture - ou deux ou plus cultures mélangées (associées)</p> <p>V1 QA11&lt;=10</p> <p>M1 Le nombre de champs doit être inférieur ou égal à 10</p>                                                                                                                                           | <p>NUMERIC: INTEGER <span>QA11</span></p> <div>-----</div>                                                                                                                                                                                                                                                                                                                                                                                                                                                                                                                                                                                                                                                                                                                                                                                                                                                                                                                                                                                                                                                                                                                                                                                                                                                                                                                                                                                                                                                                                                                                                                                                                                                             |
| <p>Listez tous les champs que le Ménage Cultive<br/>Donnez un nom à chaque champ</p> <p>I Exemple: Champ de Mamadou Champ du nord Plantation des bananes</p> <p>V1 self.Length &lt;= QA11</p> <p>M1 Mais vous avez dit qu'il y a seulement %QA11% champs! SVP, changez le numéro des champs.</p> <p>V2 fieldsToList &lt;= 0</p> <p>M2 Il faut lister encore %fieldsToList% champs!</p> | <p>LIST <span>ListeChamp</span></p> <div>.....</div>                                                                                                                                                                                                                                                                                                                                                                                                                                                                                                                                                                                                                                                                                                                                                                                                                                                                                                                                                                                                                                                                                                                                                                                                                                                                                                                                                                                                                                                                                                                                                                                                                                                                   |
| <p>VARIABLE</p> <p>QA11 - ListeChamp.Length</p>                                                                                                                                                                                                                                                                                                                                        | <p>LONG <span>fieldsToList</span></p> <p>This variable is excluded from the exported data</p>                                                                                                                                                                                                                                                                                                                                                                                                                                                                                                                                                                                                                                                                                                                                                                                                                                                                                                                                                                                                                                                                                                                                                                                                                                                                                                                                                                                                                                                                                                                                                                                                                          |

# LES CHAMPS DU MÉNAGE

E \$OK && \$P1P2

LES CHAMPS DU MÉNAGE  
Roster: DETAILS  
generated by list question [ListeChamp](#)

1esChamps

|                                                                                                                         |                                                                                                                                                                            |
|-------------------------------------------------------------------------------------------------------------------------|----------------------------------------------------------------------------------------------------------------------------------------------------------------------------|
| Quelle est la longueur du %lesChamps% en metres?<br>E false                                                             | NUMERIC: DECIMAL<br>LongueurChamp<br>-----                                                                                                                                 |
| Quelle est la largeur du %lesChamps% en metres?<br>E false                                                              | NUMERIC: DECIMAL<br>1argeurChamp<br>-----                                                                                                                                  |
| VARIABLE<br>LongueurChamp*1argeurChamp                                                                                  | DOUBLE<br>superficieM2                                                                                                                                                     |
| VARIABLE<br>superficieM2/10000                                                                                          | DOUBLE<br>SuperficieHa                                                                                                                                                     |
| Combien d'hectares a le %lesChamps%?<br>V1 self<1000<br>M1 Ça parait beaucoup! Vous êtes sur que ces sont des HECTARES? | NUMERIC: DECIMAL<br>areaHa<br>-----                                                                                                                                        |
| Quelle est la source d'eau utilisée pour arroser le champ?                                                              | SINGLE-SELECT<br>sourceEau<br>01 <input type="radio"/> Pluie<br>02 <input type="radio"/> Eau de Fleuve<br>03 <input type="radio"/> Puits<br>09 <input type="radio"/> Autre |
| Quelle autre source?<br>E sourceEau==9                                                                                  | TEXT<br>sourceEauAutre<br>-----                                                                                                                                            |
| Le %lesChamps% avait eu une seule culture ou plusieurs cultures associées <u>a la campagne précédente</u> ?             | SINGLE-SELECT<br>associe<br>01 <input type="radio"/> Monoculture<br>02 <input type="radio"/> Associé                                                                       |

Listez les cultures que le menage a cultivé sur l e %lesChamps% a la campagne précédente

- I Si la culture n'existe pas dans la liste, l'ajoutez [[ici]](QCS)
- F QCS.Yes.Contains(@optioncode)
- V1 associe == 1 && self.Length <=1 || associe == 2
- M1 Mais vous avez dit que le champs est "Monoculture"! SVP, changez po ur "Associé"

MULTI-SELECT

cul turesDuChamp

- 01 ☐ Sorgho
- 02 ☐ Petit mil
- 03 ☐ Maïs
- 04 ☐ Arachides
- 05 ☐ Riz
- 06 ☐ Oseille/bissap
- 07 ☐ Blé
- 08 ☐ Manioc
- 09 ☐ Pommes de terre
- 10 ☐ Cotton
- 11 ☐ Sésame
- 12 ☐ Fonio
- 13 ☐ Haricots
- 14 ☐ Petits poids
- 15 ☐ Soja
- 16 ☐ Patate douce

[And 3 other symbols \[23\]](#)

Ces cultures etaient intercalée?

E cul turesDuChamp.Length > 1 &&false

SINGLE-SELECT

intercale

- 01 ☐ Oui
- 02 ☐ Non

LES CHAMPS DU MÉNAGE / DETAILS

Roster: DETAILS

generated by multi-select question cul turesDuChamp

cul turesCultivees

Quelle est la longueur dut a la culture de %cult uresCultivees% ?

- I Veuillez donner la longueur en mettre
- E false

NUMERIC: DECIMAL

longueurCulture

-----

Quelle est la largeur dut a la culture de %cultur esCultivees% ?

E false

NUMERIC: DECIMAL

largeurCulture

-----

Quelle partie de %lesChamps% vous avez récol té de %rosteritle%?

E intercale==1

SINGLE-SELECT

percentChamps

- 01 ☐ un quart
- 02 ☐ un tiers
- 03 ☐ la moitié
- 04 ☐ deux tiers
- 05 ☐ trois quarts

VARIABLE

longueurCulture\*largeurCulture

DOUBLE

superCulturCarre

VARIABLE

superCulturCarre/10000

DOUBLE

SuperficeCultureHa

|                                                      |                                                                                                                                                                                                                                                                                                                                                                                                                                                                                                                                                                                                                                                                                                                                                                                                                                                                                                                                                                                                                                                         |
|------------------------------------------------------|---------------------------------------------------------------------------------------------------------------------------------------------------------------------------------------------------------------------------------------------------------------------------------------------------------------------------------------------------------------------------------------------------------------------------------------------------------------------------------------------------------------------------------------------------------------------------------------------------------------------------------------------------------------------------------------------------------------------------------------------------------------------------------------------------------------------------------------------------------------------------------------------------------------------------------------------------------------------------------------------------------------------------------------------------------|
| Dans quel mois avez-vous semé le %culturesCultivees% | <div>SINGLE-SELECT</div> <div>MoisSemance</div> <div><div>01</div><div><input type="radio"/></div><div>Janvier</div></div> <div><div>02</div><div><input type="radio"/></div><div>Fevrier</div></div> <div><div>03</div><div><input type="radio"/></div><div>Mars</div></div> <div><div>04</div><div><input type="radio"/></div><div>Avril</div></div> <div><div>05</div><div><input type="radio"/></div><div>Mai</div></div> <div><div>06</div><div><input type="radio"/></div><div>Juin</div></div> <div><div>07</div><div><input type="radio"/></div><div>Juillet</div></div> <div><div>08</div><div><input type="radio"/></div><div>Aout</div></div> <div><div>09</div><div><input type="radio"/></div><div>Septembre</div></div> <div><div>10</div><div><input type="radio"/></div><div>Octobre</div></div> <div><div>11</div><div><input type="radio"/></div><div>Novembre</div></div> <div><div>12</div><div><input type="radio"/></div><div>Decembre</div></div> <div><div>99</div><div><input type="radio"/></div><div>Ne sait pas</div></div> |
|------------------------------------------------------|---------------------------------------------------------------------------------------------------------------------------------------------------------------------------------------------------------------------------------------------------------------------------------------------------------------------------------------------------------------------------------------------------------------------------------------------------------------------------------------------------------------------------------------------------------------------------------------------------------------------------------------------------------------------------------------------------------------------------------------------------------------------------------------------------------------------------------------------------------------------------------------------------------------------------------------------------------------------------------------------------------------------------------------------------------|

# LES CULTURES SPÉCIFIQUES

E \$OK && \$P1P2

LES CULTURES SPÉCIFIQUES

Roster: DETAIL

generated by multi-select question QCS

rCulture

STATIC TEXT

E !lesChamps.Any(c => c.culturesDuChamp.Contains(@rowcode))

***Vous avez dit que vous avez cultivez %rosteritle%,  
mais il n y a aucun champ avec %rosteritle%!  
SVP, indiquez %rosteritle% dans les champs ou il était cultivé!***

|                                                                                                                                                                                                 |                                            |                  |
|-------------------------------------------------------------------------------------------------------------------------------------------------------------------------------------------------|--------------------------------------------|------------------|
| Type de cultures                                                                                                                                                                                | SINGLE-SELECT                              | QCS_typeCulture  |
| V1 !lesChamps.Any(c => c.culturesDuChamp.Contains(@rowcode))                                                                                                                                    | 01 <input type="radio"/> Traditionnel      |                  |
| M1 Vous avez dit que vous avez cultivez %rosteritle%,<br> mais il n y a au<br>cun champ avec %rosteritle%!<br> SVP, indiquez %rosteritle% [dans l<br>es champs](lesChamps) ou il était cultivé! | 02 <input type="radio"/> OMG               |                  |
|                                                                                                                                                                                                 | 03 <input type="radio"/> Autre             |                  |
| Quelle autre type de culture                                                                                                                                                                    | TEXT                                       | autreTypeCulture |
| E QCS_typeCulture==3                                                                                                                                                                            | .....                                      |                  |
| Quantité total de %rCulture% récoltée par le m<br>énage entier                                                                                                                                  | NUMERIC: INTEGER                           | qtiteToal        |
|                                                                                                                                                                                                 | -----                                      |                  |
| Quel est l'unité de la Quantité total de %rCultur<br>e% récoltée par le ménage                                                                                                                  | SINGLE-SELECT                              | unite_recolte    |
|                                                                                                                                                                                                 | 01 <input type="radio"/> Boîte de tomate   |                  |
|                                                                                                                                                                                                 | 02 <input type="radio"/> Tine              |                  |
|                                                                                                                                                                                                 | 03 <input type="radio"/> Sac grand (100kg) |                  |
|                                                                                                                                                                                                 | 04 <input type="radio"/> Sac petit (50kg)  |                  |
|                                                                                                                                                                                                 | 05 <input type="radio"/> Kilogramme        |                  |
|                                                                                                                                                                                                 | 06 <input type="radio"/> Nombre            |                  |
|                                                                                                                                                                                                 | 07 <input type="radio"/> Tonne             |                  |
| Le menage a t-il vendu du %rCulture% au marc<br>her?                                                                                                                                            | SINGLE-SELECT                              | qtiteVendu       |
|                                                                                                                                                                                                 | 01 <input type="radio"/> Oui               |                  |
|                                                                                                                                                                                                 | 00 <input type="radio"/> Non               |                  |
| Quelle est la quantite du %rCulture% vendu?                                                                                                                                                     | NUMERIC: INTEGER                           | qtitev           |
| E qtiteVendu==1                                                                                                                                                                                 | -----                                      |                  |

|                                                                                                  |                                                                                                                                                                                                                                                                                                                                                                       |
|--------------------------------------------------------------------------------------------------|-----------------------------------------------------------------------------------------------------------------------------------------------------------------------------------------------------------------------------------------------------------------------------------------------------------------------------------------------------------------------|
| <p>Quel est l'unité de la quantité de %rCulture% vendu par le ménage?</p> <p>E qtiteVendu==1</p> | <p>SINGLE-SELECT unite_vendu</p> <p>01 <input type="radio"/> Boîte de tomate</p> <p>02 <input type="radio"/> Tine</p> <p>03 <input type="radio"/> Sac grand (100kg)</p> <p>04 <input type="radio"/> Sac petit (50kg)</p> <p>05 <input type="radio"/> Kilogramme</p> <p>06 <input type="radio"/> Nombre</p> <p>07 <input type="radio"/> Tonne</p>                      |
| <p>Le ménage a-t-il acheté du %rCulture% au marché?</p>                                          | <p>SINGLE-SELECT qtiteAchete</p> <p>01 <input type="radio"/> Oui</p> <p>00 <input type="radio"/> Non</p>                                                                                                                                                                                                                                                              |
| <p>Quelle est la quantité de %rCulture% acheté au marché?</p> <p>E qtiteAchete==1</p>            | <p>NUMERIC: INTEGER quantie</p> <p>-----</p>                                                                                                                                                                                                                                                                                                                          |
| <p>Quel est l'unité de %rCulture% acheté par le ménage?</p> <p>E qtiteAchete==1</p>              | <p>SINGLE-SELECT uniteAchete</p> <p>01 <input type="radio"/> Boîte de tomate</p> <p>02 <input type="radio"/> Tine</p> <p>03 <input type="radio"/> Sac grand (100kg)</p> <p>04 <input type="radio"/> Sac petit (50kg)</p> <p>05 <input type="radio"/> Kilogramme</p> <p>06 <input type="radio"/> Nombre</p> <p>07 <input type="radio"/> Tonne</p>                      |
| <p>Quelles difficultés liées à l'environnement avez-vous été confronté avec %rCulture%?</p>      | <p>MULTI-SELECT stress</p> <p>00 <input type="checkbox"/> Aucune</p> <p>01 <input type="checkbox"/> Sècheresse</p> <p>02 <input type="checkbox"/> inondation</p> <p>03 <input type="checkbox"/> plante infectée</p> <p>04 <input type="checkbox"/> criquet pèlerin</p> <p>05 <input type="checkbox"/> oiseaux migrateurs</p> <p>09 <input type="checkbox"/> Autre</p> |
| <p>Quelle autre stress environnemental?</p> <p>E stress.Contains(9)</p>                          | <p>TEXT autre_stress</p> <p>-----</p>                                                                                                                                                                                                                                                                                                                                 |
| <p>Quelles difficultés économique vous avez eu?</p>                                              | <p>MULTI-SELECT stressEcon</p> <p>00 <input type="checkbox"/> Aucune</p> <p>01 <input type="checkbox"/> Prix d'engrais</p> <p>02 <input type="checkbox"/> Prix de pesticides</p> <p>03 <input type="checkbox"/> Prix de semences</p> <p>05 <input type="checkbox"/> Autre</p>                                                                                         |
| <p>Quelle autre difficulté?</p> <p>E stressEcon.Contains(5)</p>                                  | <p>TEXT stressEconAutre</p> <p>-----</p>                                                                                                                                                                                                                                                                                                                              |

|                                                                                              |                                                                                                                                                                         |
|----------------------------------------------------------------------------------------------|-------------------------------------------------------------------------------------------------------------------------------------------------------------------------|
| Combien de mois votre ménage consomme la production (%rCulture%) avant rupture du stock?     | NUMERIC: INTEGER<br>dureeConsommation<br>-----                                                                                                                          |
| Utilisez vous des fertilisant avec %rCulture%?                                               | SINGLE-SELECT<br>fertilisation<br>01 <input type="radio"/> Oui<br>00 <input type="radio"/> Non                                                                          |
| Quel type de fertilisant<br>E fertilisation==1                                               | SINGLE-SELECT<br>typeFertilisant<br>01 <input type="radio"/> Traditionel (fumier)<br>02 <input type="radio"/> Artificiel(chimique)                                      |
| Quel type?<br>E typeFertilisant==2                                                           | SINGLE-SELECT<br>typeArtificie<br>01 <input type="radio"/> NPK<br>02 <input type="radio"/> Urée<br>03 <input type="radio"/> Phosphate<br>05 <input type="radio"/> Autre |
| Quel autre fertilisant artificiel?<br>E typeArtificie==5                                     | TEXT<br>autreArti<br>-----                                                                                                                                              |
| Quelle quantité de fertilisant pour %rCulture%?<br>E fertilisation==1                        | NUMERIC: DECIMAL<br>quantiteFertilisant<br>-----                                                                                                                        |
| Unité<br>E fertilisation==1                                                                  | SINGLE-SELECT<br>uniteFertilisant<br>01 <input type="radio"/> Kg<br>02 <input type="radio"/> Sac de 50 kg<br>03 <input type="radio"/> charrette                         |
| Utilisez-vous d'insecticide avec %rCulture%?                                                 | SINGLE-SELECT<br>insecticide<br>01 <input type="radio"/> Oui<br>00 <input type="radio"/> Non                                                                            |
| %rCulture% a-t-il été attaqué par des Parasite/Insectes/Sauterelles ?                        | SINGLE-SELECT<br>sautereille<br>01 <input type="radio"/> Oui<br>02 <input type="radio"/> Non                                                                            |
| Quantité de la récolte perdue par <u>Parasite/Insectes/Sauterelles</u> ?<br>E sautereille==1 | NUMERIC: INTEGER<br>quantPerdue<br>-----<br>SPECIAL VALUES<br>00 Néant                                                                                                  |

|                                                                                              |                                                                                                                                                                                                                                                                                                                                                       |
|----------------------------------------------------------------------------------------------|-------------------------------------------------------------------------------------------------------------------------------------------------------------------------------------------------------------------------------------------------------------------------------------------------------------------------------------------------------|
| <p>Quelle est l'unité de %rCulture% perdue?</p> <p>E quantPerdue &gt; 0</p>                  | <p>SINGLE-SELECT unitePerdue</p> <p>01 <input type="radio"/> Boîte de tomate</p> <p>02 <input type="radio"/> Tine</p> <p>03 <input type="radio"/> Sac grand (100kg)</p> <p>04 <input type="radio"/> Sac petit (50kg)</p> <p>05 <input type="radio"/> Kilogramme</p> <p>06 <input type="radio"/> Nombre</p> <p>07 <input type="radio"/> Tonne</p>      |
| <p>Quantité de la récolte perdue par <u>autres cause</u><br/>s (périssés, volés, etc.) ?</p> | <p>NUMERIC: INTEGER quantPerdueAutre</p> <p>-----</p> <p>SPECIAL VALUES</p> <p>00 Néant</p>                                                                                                                                                                                                                                                           |
| <p>Quelle est l'unité de %rCulture% perdue?</p> <p>E quantPerdueAutre&gt;0</p>               | <p>SINGLE-SELECT unitePerdueAutre</p> <p>01 <input type="radio"/> Boîte de tomate</p> <p>02 <input type="radio"/> Tine</p> <p>03 <input type="radio"/> Sac grand (100kg)</p> <p>04 <input type="radio"/> Sac petit (50kg)</p> <p>05 <input type="radio"/> Kilogramme</p> <p>06 <input type="radio"/> Nombre</p> <p>07 <input type="radio"/> Tonne</p> |

## LES CULTURES SPÉCIFIQUES / DETAIL PRATIQUES D'AGRICULTURE

|                                                                        |                                                                                                                                                                                                                                                                     |
|------------------------------------------------------------------------|---------------------------------------------------------------------------------------------------------------------------------------------------------------------------------------------------------------------------------------------------------------------|
| <p>La culture est-elle séchée avant conservation (s<br/>tockage) ?</p> | <p>SINGLE-SELECT PA1</p> <p>01 <input type="radio"/> Oui</p> <p>02 <input type="radio"/> Non</p>                                                                                                                                                                    |
| <p>Où cette culture est-elle conservée (stockée) ?</p> <p>E PA1==1</p> | <p>SINGLE-SELECT PA2</p> <p>01 <input type="radio"/> Entrepot</p> <p>02 <input type="radio"/> Grenier</p> <p>03 <input type="radio"/> Sur le champ</p> <p>04 <input type="radio"/> Dans votre concession au vil<br/>lage</p> <p>05 <input type="radio"/> Hangar</p> |
| <p>Comment %rCulture% est conservé (stocké) ?</p> <p>E PA1==1</p>      | <p>SINGLE-SELECT PA3</p> <p>01 <input type="radio"/> Décortiquée simple</p> <p>02 <input type="radio"/> Sous forme de sacs de 50kg<br/>ou 100 kg</p> <p>03 <input type="radio"/> Autre</p>                                                                          |
| <p>Comment?</p> <p>E PA3==3</p>                                        | <p>TEXT PA3autre</p> <p>-----</p>                                                                                                                                                                                                                                   |

|                                                                                                          |                                                                                                            |
|----------------------------------------------------------------------------------------------------------|------------------------------------------------------------------------------------------------------------|
| <p>Appliquez-vous de poison (rodenticides), contre les rongeurs dans votre grenier pour la culture ?</p> | <p>SINGLE-SELECT PA4</p> <p>01 <input type="radio"/> Oui</p> <p>02 <input type="radio"/> Non</p>           |
| <p>Combien (grammes)?</p> <p>I 1 kg = 1000 grammes</p> <p>E PA4==1</p>                                   | <p>NUMERIC: INTEGER PA5</p> <p>-----</p>                                                                   |
| <p>Pratiquez-vous une technique de conservation d'eau?</p>                                               | <p>SINGLE-SELECT PA6</p> <p>01 <input type="radio"/> Oui</p> <p>02 <input type="radio"/> Non</p>           |
| <p>Dans quels champs?</p> <p>E PA6==1</p>                                                                | <p>MULTI-SELECT: LINKED PA7</p> <p>SOURCE OF CATEGORIES: TEXT LIST QUESTION <a href="#">LISTECHAMP</a></p> |

LES CULTURES SPÉCIFIQUES / DETAIL / PRATIQUES D'AGRICULTURE

**Roster: TECHNIQUE**

generated by list question [ListeChamp](#) champs

E PA7.Contains(@rowcode)

|                                                                          |                                                                                                                                                                                                                               |
|--------------------------------------------------------------------------|-------------------------------------------------------------------------------------------------------------------------------------------------------------------------------------------------------------------------------|
| <p>Quelle pratique sur le %champs%?<br/>(multiple réponses possible)</p> | <p>MULTI-SELECT PA8</p> <p>01 <input type="checkbox"/> Cordon pierreux</p> <p>02 <input type="checkbox"/> Demi-lune</p> <p>03 <input type="checkbox"/> Diguettes</p> <p>04 <input type="checkbox"/> Arrosement artificiel</p> |
| <p>Pratiquez-vous une technique de récupération des sols?</p>            | <p>SINGLE-SELECT PA9</p> <p>01 <input type="radio"/> Oui</p> <p>02 <input type="radio"/> Non</p>                                                                                                                              |
| <p>Dans quels champs?</p> <p>E PA9==1</p>                                | <p>MULTI-SELECT: LINKED PA10</p> <p>SOURCE OF CATEGORIES: TEXT LIST QUESTION <a href="#">LISTECHAMP</a></p>                                                                                                                   |

LES CULTURES SPÉCIFIQUES / DETAIL / PRATIQUES D'AGRICULTURE

**Roster: TECHNIQUE**

generated by list question [ListeChamp](#) champs2

E PA10.Contains(@rowcode)

Quelle pratique sur le %champs2%?  
(multiple réponses possible)

MULTI-SELECTPA11

01

☐ Jachère

02

☐ Rotation des cultures (répét  
é les cultures de façon cycliq  
ue)

03

☐ Assolement (changer de cult  
ures sur la même parcelle)

04

☐ Brise vent ou haie vive (plant  
er des plantes autour du ch  
amps comme bordure, exe  
mple acacia)

05

☐ Agroforesterie (associe des  
plantes pérennes comme an  
acarde aux cultures)

A quel prix avez-vous payé l'engrais?  
E rCulture.Count(x => x.fertilisation==1)>0

NUMERIC: INTEGERprixAngrais

# HANDICAPS

E \$OK1 && !\$P1P2

|                                                                        |                                                                                                                                                                                                                                                |
|------------------------------------------------------------------------|------------------------------------------------------------------------------------------------------------------------------------------------------------------------------------------------------------------------------------------------|
| HANDICAPS                                                              |                                                                                                                                                                                                                                                |
| Roster: HANDICAP                                                       |                                                                                                                                                                                                                                                |
| generated by list question <a href="#">membres</a>                     |                                                                                                                                                                                                                                                |
| r_handicaps                                                            |                                                                                                                                                                                                                                                |
| Est-ce que %roster% a un handicap (visuel, auditif, moteur ou mental)? | <div>SINGLE-SELECT</div> <div>hasHandicap</div> <div><div>01</div><div><input type="radio"/> Oui</div></div> <div><div>02</div><div><input type="radio"/> Non</div></div> <div><div>03</div><div><input type="radio"/> Ne sait pas</div></div> |
| Est-ce que %roster% est orphelin?                                      | <div>SINGLE-SELECT</div> <div>orphelin</div> <div><div>01</div><div><input type="radio"/> Oui</div></div> <div><div>02</div><div><input type="radio"/> Non</div></div>                                                                         |
| Le père de %membre% vit dans le ménage?                                | <div>SINGLE-SELECT</div> <div>hcPereDansMenage</div> <div><div>01</div><div><input type="radio"/> Oui</div></div> <div><div>02</div><div><input type="radio"/> Non</div></div>                                                                 |
| Qui est le père de %membre%                                            | <div>SINGLE-SELECT: LINKED</div> <div>SOURCE OF CATEGORIES: ROSTER <a href="#">MEMBRE</a></div> <div>pereDuHandicap</div>                                                                                                                      |
| Nom du père                                                            | <div>TEXT</div> <div>hcNomPere</div> <div></div>                                                                                                                                                                                               |
| Prénom(s) du père                                                      | <div>TEXT</div> <div>hcPrenomPere</div> <div></div>                                                                                                                                                                                            |
| Profession du père                                                     | <div>TEXT</div> <div>hcProfPere</div> <div></div>                                                                                                                                                                                              |
| Adresse / Tel du père                                                  | <div>TEXT</div> <div>hcAdrPere</div> <div></div>                                                                                                                                                                                               |
| Nombre d'enfants scolarisés de la famille                              | <div>NUMERIC: INTEGER</div> <div>hcNmbEnfScol</div> <div></div>                                                                                                                                                                                |
| Qui est la mère de %membre%                                            | <div>SINGLE-SELECT: LINKED</div> <div>SOURCE OF CATEGORIES: ROSTER <a href="#">MEMBRE</a></div> <div>mereDuHandicap</div>                                                                                                                      |
| Nom de la mère                                                         | <div>TEXT</div> <div>hcNomMere</div> <div></div>                                                                                                                                                                                               |

|                                                                                                                   |                                                                                                                                                                                                                                                                                                                                                                                                                                                                                                                                                                                                                                                                                                                                                                                                                                                                                |
|-------------------------------------------------------------------------------------------------------------------|--------------------------------------------------------------------------------------------------------------------------------------------------------------------------------------------------------------------------------------------------------------------------------------------------------------------------------------------------------------------------------------------------------------------------------------------------------------------------------------------------------------------------------------------------------------------------------------------------------------------------------------------------------------------------------------------------------------------------------------------------------------------------------------------------------------------------------------------------------------------------------|
| <div>Prénom(s) de la mère</div> <div>E mereDansMenage!=1 &amp;&amp; hasHandicap==1 &amp;&amp; age&lt;20</div>     | <div>TEXT<div>hcPrenomMere</div></div> <div></div>                                                                                                                                                                                                                                                                                                                                                                                                                                                                                                                                                                                                                                                                                                                                                                                                                             |
| <div>Profession de la mère</div> <div>E mereDansMenage!=1 &amp;&amp; hasHandicap==1 &amp;&amp; age&lt;20</div>    | <div>TEXT<div>hcProfMere</div></div> <div></div>                                                                                                                                                                                                                                                                                                                                                                                                                                                                                                                                                                                                                                                                                                                                                                                                                               |
| <div>Adresse / Tel de la mère</div> <div>E mereDansMenage!=1 &amp;&amp; hasHandicap==1 &amp;&amp; age&lt;20</div> | <div>TEXT<div>hcAdrMere</div></div> <div></div>                                                                                                                                                                                                                                                                                                                                                                                                                                                                                                                                                                                                                                                                                                                                                                                                                                |
| <div>Nature de la déficience</div> <div>E hasHandicap==1</div>                                                    | <div>MULTI-SELECT<div>hcNatureDef</div><div><div>01</div><div><input type="checkbox"/> Handicap mental (ou déficience intellectuelle)</div></div><div><div>02</div><div><input type="checkbox"/> Handicap auditif</div></div><div><div>03</div><div><input type="checkbox"/> Handicap visuel</div></div><div><div>04</div><div><input type="checkbox"/> Aveugle</div></div><div><div>05</div><div><input type="checkbox"/> Malvoyant</div></div><div><div>06</div><div><input type="checkbox"/> Handicap moteur</div></div><div><div>07</div><div><input type="checkbox"/> Autisme et Troubles Envahissants du Développement</div></div><div><div>08</div><div><input type="checkbox"/> Handicap Psychique</div></div><div><div>09</div><div><input type="checkbox"/> Pluri handicap</div></div><div><div>10</div><div><input type="checkbox"/> Polyhandicap</div></div></div> |

HANDICAPS / HANDICAP

Roster: %ROSTERTITLE%

generated by multi-select question [hcNatureDef](#)

selectedHandicaps

|                                                                                                                                                                                                                       |                                                                                                                                                                                       |
|-----------------------------------------------------------------------------------------------------------------------------------------------------------------------------------------------------------------------|---------------------------------------------------------------------------------------------------------------------------------------------------------------------------------------|
| <div>Est-ce que %rostartitle% est inné ou acquis?</div>                                                                                                                                                               | <div>SINGLE-SELECT<div>typeHandicap</div><div><div>01</div><div><input type="radio"/> Inné (né avec)</div></div><div><div>02</div><div><input type="radio"/> Acquis</div></div></div> |
| <div>Date début de %rostartitle% - Année</div> <div>E typeHandicap==2</div> <div>V1 self.InRange(1900, dateEntree.value.Year)    self==9999</div> <div>M1 L'année doit être entre 1900 et la date d'aujourd'hui</div> | <div>NUMERIC: INTEGER<div>hcAnnee</div></div> <div></div> <div>SPECIAL VALUES<div>9999<div>Ne sait pas</div></div></div>                                                              |

Date début de %rosteritle% - Mois

E typeHandicap==2 && hcAnnee!=9999

SINGLE-SELECT

hcMois

- 01 ☐ Janvier
- 02 ☐ Février
- 03 ☐ Mars
- 04 ☐ Avril
- 05 ☐ Mai
- 06 ☐ Juin
- 07 ☐ Juillet
- 08 ☐ Août
- 09 ☐ Septembre
- 10 ☐ Octobre
- 11 ☐ Novembre
- 12 ☐ Décembre
- 99 ☐ Ne sait pas

Nom du répondant

I (Si la personne n'est pas dans la liste, retournez a la [liste des membres](membres) e ajoutez cette personne!)

SINGLE-SELECT: LINKED  
SOURCE OF CATEGORIES: ROSTER [MEMBRE](#)

repondantHandicaps

# ÉMIGRATION

E (\$OK1 || \$allLeft) && !\$P1P2

|                                                                                                                                                                                                 |                                                                               |                       |
|-------------------------------------------------------------------------------------------------------------------------------------------------------------------------------------------------|-------------------------------------------------------------------------------|-----------------------|
| Depuis %dateBasePretty% une personne a quit<br>té le ménage?                                                                                                                                    | SINGLE-SELECT<br>01 <input type="radio"/> Oui<br>02 <input type="radio"/> Non | avaitEmigration       |
| Une de ces personnes a quitté le ménage depu<br>is de %dateBasePretty%<br>(Si la personne n'est pas dans la liste,<br>retournez a la [liste des membres](membres) e<br>ajoutez cette personne!) | MULTI-SELECT: LINKED<br>SOURCE OF CATEGORIES: ROSTER <a href="#">MEMBRE</a>   | anyEmigration         |
| E /* don't ask if all members are new! -> new household */<br>/* membre.Count(x=>x.preloadedMember==1)>0 */ avaitEmigr<br>ation==1                                                              |                                                                               |                       |
| STATIC TEXT                                                                                                                                                                                     |                                                                               |                       |
| E result==6 && (anyEmigration.Length < membres.Length)<br><i><b>Vous avez dites que tout le ménage a déménagé!<br/>Il faut selectionner tous les membres du ménage.</b></i>                     |                                                                               |                       |
| Quelqu'un du ménage a l'intention de quitter l<br>e ménage?                                                                                                                                     | SINGLE-SELECT<br>01 <input type="radio"/> Oui<br>02 <input type="radio"/> Non | anyIntendedEmigration |
| E !\$allLeft                                                                                                                                                                                    |                                                                               |                       |
| Qui a l'intention de quitter le ménage?<br>(Si la personne n'est pas dans la liste,<br>retournez a la [liste des membres](membres) e<br>ajoutez cette personne!)                                | MULTI-SELECT: LINKED<br>SOURCE OF CATEGORIES: ROSTER <a href="#">MEMBRE</a>   | intendedEmigration    |
| E anyIntendedEmigration==1                                                                                                                                                                      |                                                                               |                       |
| Nom du répondant                                                                                                                                                                                | SINGLE-SELECT: LINKED<br>SOURCE OF CATEGORIES: ROSTER <a href="#">MEMBRE</a>  | repondantEmig         |
| E !\$allLeft                                                                                                                                                                                    |                                                                               |                       |

## ÉMIGRATION

### Roster: ÉMIGRATION / DÉPLACEMENT SAISONNIER

generated by list question [membres](#)

r\_emigration

E anyEmigration.Any(x=>x[0]==@rowcode) /\* previously only worked with x[1]==@rowcode, now with x[0]==@rowcode as docum  
ented in public qxs!!! \*/

|                                                        |                                                                               |                      |
|--------------------------------------------------------|-------------------------------------------------------------------------------|----------------------|
| S'agit-il d'une émigration interne?                    | SINGLE-SELECT<br>01 <input type="radio"/> Oui<br>02 <input type="radio"/> Non | emigrationInterne    |
| E false                                                |                                                                               |                      |
| A %rosteritle% émigré et est revenu(e)?                | SINGLE-SELECT<br>01 <input type="radio"/> Oui<br>02 <input type="radio"/> Non | emigration6mois      |
| A %rosteritle% émigré et a l'intention de reven<br>ir? | SINGLE-SELECT<br>01 <input type="radio"/> Oui<br>02 <input type="radio"/> Non | emigration6moisPrevu |
| E emigration6mois==2                                   |                                                                               |                      |

|                                                                                                                                                                                                                                                                                                                                                                                                         |                                                                                                                                                                                                                                                                                                                                                                                                                                                                                                                                                                                                                                                                                                                                       |
|---------------------------------------------------------------------------------------------------------------------------------------------------------------------------------------------------------------------------------------------------------------------------------------------------------------------------------------------------------------------------------------------------------|---------------------------------------------------------------------------------------------------------------------------------------------------------------------------------------------------------------------------------------------------------------------------------------------------------------------------------------------------------------------------------------------------------------------------------------------------------------------------------------------------------------------------------------------------------------------------------------------------------------------------------------------------------------------------------------------------------------------------------------|
| <div>VARIABLE</div> <div>emigration6mois==1 ? " " : "prévue"</div>                                                                                                                                                                                                                                                                                                                                      | <div>STRING</div> <div>returned</div>                                                                                                                                                                                                                                                                                                                                                                                                                                                                                                                                                                                                                                                                                                 |
| <div>Date de l'émigration - Année</div> <div>V1 self &gt;= dateBase.Value.Year</div> <div>M1 Impossible! %rosteritle% était encore dans le ménage en %dateBase.Pretty%!</div> <div>V2 self &lt;= dateEntree.Value.Year</div> <div>M2 Ne peut pas être à l'avenir!</div>                                                                                                                                 | <div>NUMERIC: INTEGER</div> <div>anneeE</div> <div>-----</div>                                                                                                                                                                                                                                                                                                                                                                                                                                                                                                                                                                                                                                                                        |
| <div>Date de l'émigration - Mois</div> <div>E anneeE!=9999</div>                                                                                                                                                                                                                                                                                                                                        | <div>SINGLE-SELECT</div> <div>moisE</div> <div>01 <input type="radio"/> Janvier</div> <div>02 <input type="radio"/> Février</div> <div>03 <input type="radio"/> Mars</div> <div>04 <input type="radio"/> Avril</div> <div>05 <input type="radio"/> Mai</div> <div>06 <input type="radio"/> Juin</div> <div>07 <input type="radio"/> Juillet</div> <div>08 <input type="radio"/> Août</div> <div>09 <input type="radio"/> Septembre</div> <div>10 <input type="radio"/> Octobre</div> <div>11 <input type="radio"/> Novembre</div> <div>12 <input type="radio"/> Décembre</div> <div>99 <input type="radio"/> Ne sait pas</div>                                                                                                        |
| <div>Date de l'émigration - Jour</div> <div>F (@optioncode==30 &amp;&amp; moisE!=2)    (@optioncode==31 &amp;&amp; moisE.InList(1,3,5,7,8,10,12))    @optioncode.InRange(1,29)    @optioncode==99</div> <div>E moisE.InRange(1,12)</div> <div>V1 new DateTime((int) anneeE,(int) moisE,jourE==99?1:(int) jourE) &lt;= dateEntree</div> <div>M1 Date de la émigration ne peut pas être à l'avenir!</div> | <div>SINGLE-SELECT</div> <div>jourE</div> <div>01 <input type="radio"/> 1</div> <div>02 <input type="radio"/> 2</div> <div>03 <input type="radio"/> 3</div> <div>04 <input type="radio"/> 4</div> <div>05 <input type="radio"/> 5</div> <div>06 <input type="radio"/> 6</div> <div>07 <input type="radio"/> 7</div> <div>08 <input type="radio"/> 8</div> <div>09 <input type="radio"/> 9</div> <div>10 <input type="radio"/> 10</div> <div>11 <input type="radio"/> 11</div> <div>12 <input type="radio"/> 12</div> <div>13 <input type="radio"/> 13</div> <div>14 <input type="radio"/> 14</div> <div>15 <input type="radio"/> 15</div> <div>16 <input type="radio"/> 16</div> <div><a href="#">And 16 other symbols [24]</a></div> |
| <div>Date %returned% de Retour - Année</div> <div>E emigration6mois==1    emigration6moisPrevu==1</div>                                                                                                                                                                                                                                                                                                 | <div>NUMERIC: INTEGER</div> <div>anneeER</div> <div>-----</div>                                                                                                                                                                                                                                                                                                                                                                                                                                                                                                                                                                                                                                                                       |

|                                                                                                                                                                                                                                                                                                                |                                                                                                                                                                                                                                                                                                                                                                                                                                                                                                                                                                                                                                                            |
|----------------------------------------------------------------------------------------------------------------------------------------------------------------------------------------------------------------------------------------------------------------------------------------------------------------|------------------------------------------------------------------------------------------------------------------------------------------------------------------------------------------------------------------------------------------------------------------------------------------------------------------------------------------------------------------------------------------------------------------------------------------------------------------------------------------------------------------------------------------------------------------------------------------------------------------------------------------------------------|
| <p>Date %returned% de Retour - Mois</p> <p>E anneeER!=9999 &amp;&amp; (emigration6mois==1    emigration6moisP<br/>revu==1)</p>                                                                                                                                                                                 | <p>SINGLE-SELECT</p> <p>moisER</p> <p>01 <input type="radio"/> Janvier</p> <p>02 <input type="radio"/> Février</p> <p>03 <input type="radio"/> Mars</p> <p>04 <input type="radio"/> Avril</p> <p>05 <input type="radio"/> Mai</p> <p>06 <input type="radio"/> Juin</p> <p>07 <input type="radio"/> Juillet</p> <p>08 <input type="radio"/> Août</p> <p>09 <input type="radio"/> Septembre</p> <p>10 <input type="radio"/> Octobre</p> <p>11 <input type="radio"/> Novembre</p> <p>12 <input type="radio"/> Décembre</p> <p>99 <input type="radio"/> Ne sait pas</p>                                                                                        |
| <p>Date %returned% de Retour - Jour</p> <p>F (@optioncode==30 &amp;&amp; moisER!=2)    (@optioncode==31 &amp;&amp; moisER.I<br/>nList(1,3,5,7,8,10,12))    @optioncode.InRange(1,29)    @optioncode=<br/>=99</p> <p>E moisER.InRange(1,12) &amp;&amp; (emigration6mois==1    emigratio<br/>n6moisPrevu==1)</p> | <p>SINGLE-SELECT</p> <p>jourER</p> <p>01 <input type="radio"/> 1</p> <p>02 <input type="radio"/> 2</p> <p>03 <input type="radio"/> 3</p> <p>04 <input type="radio"/> 4</p> <p>05 <input type="radio"/> 5</p> <p>06 <input type="radio"/> 6</p> <p>07 <input type="radio"/> 7</p> <p>08 <input type="radio"/> 8</p> <p>09 <input type="radio"/> 9</p> <p>10 <input type="radio"/> 10</p> <p>11 <input type="radio"/> 11</p> <p>12 <input type="radio"/> 12</p> <p>13 <input type="radio"/> 13</p> <p>14 <input type="radio"/> 14</p> <p>15 <input type="radio"/> 15</p> <p>16 <input type="radio"/> 16</p> <p><a href="#">And 16 other symbols [25]</a></p> |
| <p>Quelle était la destination de %roster%title%?</p>                                                                                                                                                                                                                                                          | <p>SINGLE-SELECT</p> <p>destination</p> <p>01 <input type="radio"/> Intérieur SSDS</p> <p>02 <input type="radio"/> Au Burkina Faso</p> <p>03 <input type="radio"/> Hors Burkina Faso</p>                                                                                                                                                                                                                                                                                                                                                                                                                                                                   |

|                                                                                                                                                  |                                                                                                                                                                                                                                                                                                                                                                                                                                                                                                                                                                                                                                                                                                                                                                                                                                             |
|--------------------------------------------------------------------------------------------------------------------------------------------------|---------------------------------------------------------------------------------------------------------------------------------------------------------------------------------------------------------------------------------------------------------------------------------------------------------------------------------------------------------------------------------------------------------------------------------------------------------------------------------------------------------------------------------------------------------------------------------------------------------------------------------------------------------------------------------------------------------------------------------------------------------------------------------------------------------------------------------------------|
| <div>A quel village?</div> <div>I Tapez partie du nom du village, et sélectionnez de la liste</div> <div>E destination==1</div>                  | <div>SINGLE-SELECT: COMBO BOX</div> <div>villDestination</div> <div>02 <input type="radio"/> Toni</div> <div>05 <input type="radio"/> Boron</div> <div>08 <input type="radio"/> Cissé</div> <div>09 <input type="radio"/> Dankoumana</div> <div>10 <input type="radio"/> Dembeléla</div> <div>11 <input type="radio"/> Denissa</div> <div>12 <input type="radio"/> Denissa Mossi</div> <div>14 <input type="radio"/> Dionkongo</div> <div>15 <input type="radio"/> Dina</div> <div>16 <input type="radio"/> Dokoura</div> <div>17 <input type="radio"/> Goni</div> <div>18 <input type="radio"/> Kamadena</div> <div>19 <input type="radio"/> Kèmena</div> <div>21 <input type="radio"/> Koro</div> <div>23 <input type="radio"/> Leï</div> <div>27 <input type="radio"/> Ouetté</div> <div><a href="#">And 43 other symbols [26]</a></div> |
| <div>A quel secteur?</div> <div>E destination==1</div> <div>V1 self.InRange(0,99)</div> <div>M1 Secteur a seulement 2 chiffres!</div>            | <div>NUMERIC: INTEGER</div> <div>secteurDestination</div> <div>-----</div> <div>SPECIAL VALUES</div> <div>00 00</div>                                                                                                                                                                                                                                                                                                                                                                                                                                                                                                                                                                                                                                                                                                                       |
| <div>A quelle concession?</div> <div>E destination==1</div> <div>V1 self.InRange(1,9999)</div> <div>M1 Concession a entre 1 et 4 chiffres.</div> | <div>NUMERIC: INTEGER</div> <div>concessionDestination</div> <div>-----</div> <div>SPECIAL VALUES</div> <div>9999 Ne sait pas</div>                                                                                                                                                                                                                                                                                                                                                                                                                                                                                                                                                                                                                                                                                                         |
| <div>A quel ménage?</div> <div>I XX - si le ménage est inconnu</div> <div>E destination==1</div>                                                 | <div>TEXT</div> <div>menageDestination</div> <div>.....</div>                                                                                                                                                                                                                                                                                                                                                                                                                                                                                                                                                                                                                                                                                                                                                                               |

|                                                                                                                                                                       |                                                                                                                                                                                                                                                                                                                                                                                                                                                                                                                                                                                         |
|-----------------------------------------------------------------------------------------------------------------------------------------------------------------------|-----------------------------------------------------------------------------------------------------------------------------------------------------------------------------------------------------------------------------------------------------------------------------------------------------------------------------------------------------------------------------------------------------------------------------------------------------------------------------------------------------------------------------------------------------------------------------------------|
| <p>A quel lieu?</p> <p>F (@optioncode&lt;=4    @optioncode==99) &amp;&amp; destination==2    @optioncode&gt;4 &amp;&amp; destination==3</p> <p>E destination&gt;1</p> | <p>SINGLE-SELECT <span>destinationHorsSSDS</span></p> <p>01 <input type="radio"/> Ouaga</p> <p>02 <input type="radio"/> Bobo</p> <p>03 <input type="radio"/> Dedougou</p> <p>05 <input type="radio"/> Côte d'Ivoire</p> <p>06 <input type="radio"/> Mali</p> <p>07 <input type="radio"/> Autre lieu en Afrique</p> <p>08 <input type="radio"/> Amerique</p> <p>09 <input type="radio"/> Asie</p> <p>10 <input type="radio"/> Europe</p> <p>11 <input type="radio"/> Australie</p> <p>99 <input type="radio"/> Autre</p>                                                                 |
| <p>Quelle autre destination?</p> <p>E destinationHorsSSDS==99</p>                                                                                                     | <p>TEXT <span>destinationHorsSSDSautre</span></p> <p>.....</p>                                                                                                                                                                                                                                                                                                                                                                                                                                                                                                                          |
| <p>Raison de la émigration?</p> <p>E false</p>                                                                                                                        | <p>SINGLE-SELECT <span>raisonEmigration01d</span></p> <p>01 <input type="radio"/> Mariage</p> <p>02 <input type="radio"/> Accoucher</p> <p>03 <input type="radio"/> Cultiver</p> <p>04 <input type="radio"/> Travail rémunéré en ville</p> <p>05 <input type="radio"/> Affectation/obtention d'emploi</p> <p>06 <input type="radio"/> Travail minier</p> <p>07 <input type="radio"/> Travail dans les plantations</p> <p>08 <input type="radio"/> Pâturage</p> <p>09 <input type="radio"/> Etudier</p> <p>10 <input type="radio"/> Orpaillage</p> <p>99 <input type="radio"/> Autre</p> |

|                                                                                                                                                                                                                                                                                                                                                                                                |                                                                                                                                                                                                                                                                                                                                                                                                                                                                                                                                                                                                                                                                                                                                                                                                                                                                                                                                                                                                                                                                                                                                                                                                                                                                                                                                                                       |
|------------------------------------------------------------------------------------------------------------------------------------------------------------------------------------------------------------------------------------------------------------------------------------------------------------------------------------------------------------------------------------------------|-----------------------------------------------------------------------------------------------------------------------------------------------------------------------------------------------------------------------------------------------------------------------------------------------------------------------------------------------------------------------------------------------------------------------------------------------------------------------------------------------------------------------------------------------------------------------------------------------------------------------------------------------------------------------------------------------------------------------------------------------------------------------------------------------------------------------------------------------------------------------------------------------------------------------------------------------------------------------------------------------------------------------------------------------------------------------------------------------------------------------------------------------------------------------------------------------------------------------------------------------------------------------------------------------------------------------------------------------------------------------|
| <p>Quelle est la principale activité prévue de %rost ertitle% a la destination?</p>                                                                                                                                                                                                                                                                                                            | <div> <div>SINGLE-SELECT</div> <div>raisonEmigration</div> <div> <div>01</div> <div><input type="radio"/></div> <div>Mariage</div> </div> <div> <div>02</div> <div><input type="radio"/></div> <div>Accoucher</div> </div> <div> <div>11</div> <div><input type="radio"/></div> <div>Confiage</div> </div> <div> <div>03</div> <div><input type="radio"/></div> <div>Cultiver</div> </div> <div> <div>12</div> <div><input type="radio"/></div> <div>Suivre un parent</div> </div> <div> <div>13</div> <div><input type="radio"/></div> <div>Visiter parents/amis</div> </div> <div> <div>04</div> <div><input type="radio"/></div> <div>Travail rémunéré en ville</div> </div> <div> <div>05</div> <div><input type="radio"/></div> <div>Affectation/obtention d'emp</div> </div> <div> <div>loi</div> <div></div> <div></div> </div> <div> <div>06</div> <div><input type="radio"/></div> <div>Travail minier</div> </div> <div> <div>07</div> <div><input type="radio"/></div> <div>Travail dans les plantations</div> </div> <div> <div>08</div> <div><input type="radio"/></div> <div>Pâturage</div> </div> <div> <div>09</div> <div><input type="radio"/></div> <div>Etudier</div> </div> <div> <div>10</div> <div><input type="radio"/></div> <div>Orpaillage</div> </div> <div> <div>99</div> <div><input type="radio"/></div> <div>Autre</div> </div> </div> |
| <p>Quelle autre raison?</p> <p>E raisonEmigration==99</p>                                                                                                                                                                                                                                                                                                                                      | <div> <div>TEXT</div> <div>raisonAutreE</div> <div> <div></div> <div>.....</div> </div> </div>                                                                                                                                                                                                                                                                                                                                                                                                                                                                                                                                                                                                                                                                                                                                                                                                                                                                                                                                                                                                                                                                                                                                                                                                                                                                        |
| <p>Causes de la émigration</p> <p>F (raisonEmigration==3 &amp;&amp; @optioncode.InList(1,2,3,4,99) )    (raisonEmigration==4 &amp;&amp; @optioncode.InList(4,99) )    (raisonEmigration==6 &amp;&amp; @optioncode.InList(1,2,4,99) )    (raisonEmigration==7 &amp;&amp; @opt</p> <p><a href="#">And 109 other symbols [3]</a></p> <p>E !raisonEmigration.InList(1,2,5,8,9) &amp;&amp;false</p> | <div> <div>SINGLE-SELECT</div> <div>causeEmigrationOld</div> <div> <div>01</div> <div><input type="radio"/></div> <div>Récoltes insuffisantes</div> </div> <div> <div>02</div> <div><input type="radio"/></div> <div>Saison pluvieuse inondant o</div> <div>u avec poches de sécheress</div> <div>e</div> </div> <div> <div>03</div> <div><input type="radio"/></div> <div>Recherche de terres cultivab</div> <div>les</div> </div> <div> <div>04</div> <div><input type="radio"/></div> <div>Besoin quelconque d'argent</div> </div> <div> <div>05</div> <div><input type="radio"/></div> <div>Affectation/obtention d'emp</div> </div> <div> <div>loi</div> <div></div> <div></div> </div> <div> <div>06</div> <div><input type="radio"/></div> <div>Mariage</div> </div> <div> <div>07</div> <div><input type="radio"/></div> <div>Accouchement</div> </div> <div> <div>08</div> <div><input type="radio"/></div> <div>Etudes</div> </div> <div> <div>09</div> <div><input type="radio"/></div> <div>Confiage</div> </div> <div> <div>10</div> <div><input type="radio"/></div> <div>Prob. conjugal</div> </div> <div> <div>11</div> <div><input type="radio"/></div> <div>Prob. de santé</div> </div> <div> <div>99</div> <div><input type="radio"/></div> <div>Autre</div> </div> </div>                                                                         |



# IMMIGRATION

E \$OK1 && !\$P1P2

|                                                                                                                                                                                                                                                                                       |                                                                               |                  |
|---------------------------------------------------------------------------------------------------------------------------------------------------------------------------------------------------------------------------------------------------------------------------------------|-------------------------------------------------------------------------------|------------------|
| Depuis %dateBasePretty% une personne est arrivée dans le ménage?                                                                                                                                                                                                                      | SINGLE-SELECT<br>01 <input type="radio"/> Oui<br>02 <input type="radio"/> Non | avaitImmigration |
| Selectionnez toutes les personnes qui sont arrivées dans votre ménage depuis de %dateBasePretty%<br>- même si elles sont reparties ou ont l'intention de repartir.<br>(Si la personne n'est pas dans la liste, retournez a la [liste des membres](membres) e ajoutez cette personne!) | MULTI-SELECT: LINKED<br>SOURCE OF CATEGORIES: ROSTER <a href="#">MEMBRE</a>   | anyImmigration   |
| E avaitImmigration==1                                                                                                                                                                                                                                                                 |                                                                               |                  |
| Nom du répondant                                                                                                                                                                                                                                                                      | SINGLE-SELECT: LINKED<br>SOURCE OF CATEGORIES: ROSTER <a href="#">MEMBRE</a>  | repondantImmig   |

IMMIGRATION  
Roster: IMMIGRÉ  
generated by list question [membres](#) r\_immigration  
E anyImmigration.Any(x=>x[0]==@rowcode) /\* what the heck?! In PUBLIC EXAMPLE HH Workers Demo it works with x[0]==@rowcode but not here!!! \*/ && !\$P1P2

|                                             |                                    |
|---------------------------------------------|------------------------------------|
| VARIABLE<br>r_immigration[@rowcode].rowname | STRING<br>immigrant                |
| Combien de fois %membre% a immigré?         | NUMERIC: INTEGER<br>nbImmigrations |

IMMIGRATION / IMMIGRÉ  
Roster: IMMIGRATION  
generated by numeric question [nbImmigrations](#) r\_immigration\_episode

|                                    |                                                                               |             |
|------------------------------------|-------------------------------------------------------------------------------|-------------|
| %membre% a résidé au moins 2 mois? | SINGLE-SELECT<br>01 <input type="radio"/> Oui<br>02 <input type="radio"/> Non | plusDe2Mois |
|------------------------------------|-------------------------------------------------------------------------------|-------------|

IMMIGRATION / IMMIGRÉ / IMMIGRATION  
IMMIGRATION %MEMBRE%

E /\* only if born before previous census (ageInMonths1 > (CenturyMonthCode(dateEntree.Value.Month, dateEntree.Value.Year) - CenturyMonthCode(dateBase.Value.Month, dateBase.Value.Year) - ((dateEntree.Value.Month - 1) \* 12)) [And 135 other symbols \[2\]](#)

STATIC TEXT

*%membre% n'était pas dans le ménage au census anterieur.  
Donc %membre% doit avoir immigré après.*

|                                    |                                                                               |                  |
|------------------------------------|-------------------------------------------------------------------------------|------------------|
| S'agit-il d'une migration interne? | SINGLE-SELECT<br>01 <input type="radio"/> Oui<br>02 <input type="radio"/> Non | migrationInterne |
|------------------------------------|-------------------------------------------------------------------------------|------------------|

E false

|                                                                                                                                                                                             |                                                                                                                                                                                                                                                                                                                                                                                                                                                                                                                                                                                                                                                                                                                                                                                                                                                                                                     |
|---------------------------------------------------------------------------------------------------------------------------------------------------------------------------------------------|-----------------------------------------------------------------------------------------------------------------------------------------------------------------------------------------------------------------------------------------------------------------------------------------------------------------------------------------------------------------------------------------------------------------------------------------------------------------------------------------------------------------------------------------------------------------------------------------------------------------------------------------------------------------------------------------------------------------------------------------------------------------------------------------------------------------------------------------------------------------------------------------------------|
| A %membre% immigré et est reparti(e)?                                                                                                                                                       | <div>SINGLE-SELECTimmigration6mois</div> <div><div>01</div><div><input type="radio"/> Oui</div></div> <div><div>02</div><div><input type="radio"/> Non</div></div>                                                                                                                                                                                                                                                                                                                                                                                                                                                                                                                                                                                                                                                                                                                                  |
| A %membre% immigré et a l'intention de repartir?<br>E immigration6mois==2                                                                                                                   | <div>SINGLE-SELECTimmigration6moisPrevu</div> <div><div>01</div><div><input type="radio"/> Oui</div></div> <div><div>02</div><div><input type="radio"/> Non</div></div>                                                                                                                                                                                                                                                                                                                                                                                                                                                                                                                                                                                                                                                                                                                             |
| VARIABLE<br>immigration6mois==1 ? " " : "prévue"                                                                                                                                            | <div>STRINGleft</div>                                                                                                                                                                                                                                                                                                                                                                                                                                                                                                                                                                                                                                                                                                                                                                                                                                                                               |
| %membre% a-t-il déjà été enregistré?                                                                                                                                                        | <div>SINGLE-SELECTisEnregistre</div> <div><div>01</div><div><input type="radio"/> Oui</div></div> <div><div>02</div><div><input type="radio"/> Non</div></div>                                                                                                                                                                                                                                                                                                                                                                                                                                                                                                                                                                                                                                                                                                                                      |
| %membre% avait-il vécu dans ce ménage avant ?                                                                                                                                               | <div>SINGLE-SELECTformerMember</div> <div><div>01</div><div><input type="radio"/> Oui</div></div> <div><div>02</div><div><input type="radio"/> Non</div></div>                                                                                                                                                                                                                                                                                                                                                                                                                                                                                                                                                                                                                                                                                                                                      |
| Date de l'immigration - Année<br>V1 self >= dateBase.Value.Year<br>M1 Seulement immigrés depuis de %dateBasePretty%!<br>V2 self <= dateEntree.Value.Year<br>M2 Ne peut pas être à l'avenir! | <div>NUMERIC: INTEGERanneeI</div> <div>-----</div>                                                                                                                                                                                                                                                                                                                                                                                                                                                                                                                                                                                                                                                                                                                                                                                                                                                  |
| Date de l'immigration - Mois<br>E anneeI!=9999                                                                                                                                              | <div>SINGLE-SELECTmoisI</div> <div><div>01</div><div><input type="radio"/> Janvier</div></div> <div><div>02</div><div><input type="radio"/> Février</div></div> <div><div>03</div><div><input type="radio"/> Mars</div></div> <div><div>04</div><div><input type="radio"/> Avril</div></div> <div><div>05</div><div><input type="radio"/> Mai</div></div> <div><div>06</div><div><input type="radio"/> Juin</div></div> <div><div>07</div><div><input type="radio"/> Juillet</div></div> <div><div>08</div><div><input type="radio"/> Août</div></div> <div><div>09</div><div><input type="radio"/> Septembre</div></div> <div><div>10</div><div><input type="radio"/> Octobre</div></div> <div><div>11</div><div><input type="radio"/> Novembre</div></div> <div><div>12</div><div><input type="radio"/> Décembre</div></div> <div><div>99</div><div><input type="radio"/> Ne sait pas</div></div> |



|                                                                                                                                                                                                                                                                                                           |                                                                                                                                                                                                                                                                                                                                                                                                                                                                                                                                                                                                                                                                                                                                                                                                                                                                                                                                                                                                                                                                                                                                                                                                   |
|-----------------------------------------------------------------------------------------------------------------------------------------------------------------------------------------------------------------------------------------------------------------------------------------------------------|---------------------------------------------------------------------------------------------------------------------------------------------------------------------------------------------------------------------------------------------------------------------------------------------------------------------------------------------------------------------------------------------------------------------------------------------------------------------------------------------------------------------------------------------------------------------------------------------------------------------------------------------------------------------------------------------------------------------------------------------------------------------------------------------------------------------------------------------------------------------------------------------------------------------------------------------------------------------------------------------------------------------------------------------------------------------------------------------------------------------------------------------------------------------------------------------------|
| <div>Date %left% de Départ - Jour</div> <div>F (@optioncode==30 &amp;&amp; moisIR!=2)    (@optioncode==31 &amp;&amp; moisIR.InList(1,3,5,7,8,10,12))    @optioncode.InRange(1,29)    @optioncode==99</div> <div>E moisIR.InRange(1,12) &amp;&amp; (immigration6mois==1    immigration6moisPrevu==1)</div> | <div>SINGLE-SELECT</div> <div>jourIR</div> <div><div>01</div><div><input type="radio"/></div><div>1</div></div> <div><div>02</div><div><input type="radio"/></div><div>2</div></div> <div><div>03</div><div><input type="radio"/></div><div>3</div></div> <div><div>04</div><div><input type="radio"/></div><div>4</div></div> <div><div>05</div><div><input type="radio"/></div><div>5</div></div> <div><div>06</div><div><input type="radio"/></div><div>6</div></div> <div><div>07</div><div><input type="radio"/></div><div>7</div></div> <div><div>08</div><div><input type="radio"/></div><div>8</div></div> <div><div>09</div><div><input type="radio"/></div><div>9</div></div> <div><div>10</div><div><input type="radio"/></div><div>10</div></div> <div><div>11</div><div><input type="radio"/></div><div>11</div></div> <div><div>12</div><div><input type="radio"/></div><div>12</div></div> <div><div>13</div><div><input type="radio"/></div><div>13</div></div> <div><div>14</div><div><input type="radio"/></div><div>14</div></div> <div><div>15</div><div><input type="radio"/></div><div>15</div></div> <div><div>16</div><div><input type="radio"/></div><div>16</div></div> |
|-----------------------------------------------------------------------------------------------------------------------------------------------------------------------------------------------------------------------------------------------------------------------------------------------------------|---------------------------------------------------------------------------------------------------------------------------------------------------------------------------------------------------------------------------------------------------------------------------------------------------------------------------------------------------------------------------------------------------------------------------------------------------------------------------------------------------------------------------------------------------------------------------------------------------------------------------------------------------------------------------------------------------------------------------------------------------------------------------------------------------------------------------------------------------------------------------------------------------------------------------------------------------------------------------------------------------------------------------------------------------------------------------------------------------------------------------------------------------------------------------------------------------|

[And 16 other symbols \[28\]](#)

|                                                                                                                                                                  |                                                                                                                                                                                                                                                                                                                                                                                                                                                                                                                                                                                                              |
|------------------------------------------------------------------------------------------------------------------------------------------------------------------|--------------------------------------------------------------------------------------------------------------------------------------------------------------------------------------------------------------------------------------------------------------------------------------------------------------------------------------------------------------------------------------------------------------------------------------------------------------------------------------------------------------------------------------------------------------------------------------------------------------|
| <p>De quel secteur?</p> <p>E provenance==1<br/>V1 self.InRange(0,99)<br/>M1 Secteur a seulement 2 chiffres!</p>                                                  | <p>NUMERIC: INTEGER <span>secteurProvenance</span></p> <p>-----</p> <p>SPECIAL VALUES</p> <p>00      00</p>                                                                                                                                                                                                                                                                                                                                                                                                                                                                                                  |
| <p>De quelle concession?</p> <p>E provenance==1<br/>V1 self.InRange(1,9999)<br/>M1 Concession a entre 1 et 4 chiffres.</p>                                       | <p>NUMERIC: INTEGER <span>concessionProvenance</span></p> <p>-----</p> <p>SPECIAL VALUES</p> <p>9999      Ne sait pas</p>                                                                                                                                                                                                                                                                                                                                                                                                                                                                                    |
| <p>De quel ménage?</p> <p>I XX - si le ménage est inconnu<br/>E provenance==1</p>                                                                                | <p>TEXT <span>menageProvenance</span></p> <p>-----</p>                                                                                                                                                                                                                                                                                                                                                                                                                                                                                                                                                       |
| <p>De quel lieu?</p> <p>F (@optioncode&lt;=4    @optioncode==99) &amp;&amp; provenance==2    @optioncode&gt;4 &amp;&amp; provenance==3<br/>E provenance&gt;1</p> | <p>SINGLE-SELECT <span>provenanceHorsSSDS</span></p> <p>01      <input type="radio"/> Ouaga<br/>02      <input type="radio"/> Bobo<br/>03      <input type="radio"/> Dedougou<br/>05      <input type="radio"/> Côte d'Ivoire<br/>06      <input type="radio"/> Mali<br/>07      <input type="radio"/> Autre lieu en Afrique<br/>08      <input type="radio"/> Amerique<br/>09      <input type="radio"/> Asie<br/>10      <input type="radio"/> Europe<br/>11      <input type="radio"/> Australie<br/>99      <input type="radio"/> Autre</p>                                                              |
| <p>Quelle autre provenance?</p> <p>E provenanceHorsSSDS==99</p>                                                                                                  | <p>TEXT <span>provenanceHorsSSDSautre</span></p> <p>-----</p>                                                                                                                                                                                                                                                                                                                                                                                                                                                                                                                                                |
| <p>Raison/motif de la immigration?</p> <p>E false</p>                                                                                                            | <p>SINGLE-SELECT <span>raisonMigration</span></p> <p>01      <input type="radio"/> Mariage<br/>02      <input type="radio"/> Accoucher<br/>03      <input type="radio"/> Cultiver<br/>04      <input type="radio"/> Travail rémunéré en ville<br/>05      <input type="radio"/> Affectation/obtention d'emploi<br/>06      <input type="radio"/> Travail minier<br/>07      <input type="radio"/> Travail dans les plantations<br/>08      <input type="radio"/> Pâturage<br/>09      <input type="radio"/> Etudier<br/>10      <input type="radio"/> Orpaillage<br/>99      <input type="radio"/> Autre</p> |



Quelles sont les raisons de quitter sa maison pour %raisonImmigration%?

I   jusque 3 selections possible  
F   (raisonImmigration==1 && @optioncode.InList(15,12,98,99)) || (raisonImmigration==2 && @optioncode.InList(16,12,17,98,99)) || (raisonImmigration==11 && @optioncode.InList(4,12,14,10,16,98,99)) || (r  
[And 766 other symbols \[6\]](#)

- MULTI-SELECT
- causesImmigration
- 01

☐ Récoltes insuffisantes
- 02

☐ Saison pluvieuse inondant ou avec poches de sécheresse
- 03

☐ Pas de terres cultivables
- 13

☐ Pas de paturages
- 18

☐ Pas de travail ici
- 04

☐ Besoin quelconque d'argent
- 14

☐ Aucune (bonne) école ici
- 15

☐ Aventure/Liberté
- 16

☐ Meilleurs services de santé
- 10

☐ Prob. conjugal
- 11

☐ Prob. de santé
- 17

☐ Être avec famille
- 12

☐ Insecurité
- 98

☐ Aucune raison particulière
- 99

☐ Autre

DÉCÈS

E (\$OK1 || \$allDead) && !\$P1P2

|                                                                                                                                                                         |                                                                                                           |
|-------------------------------------------------------------------------------------------------------------------------------------------------------------------------|-----------------------------------------------------------------------------------------------------------|
| <p>Y-a-t-il eu un ou plusieurs décès dans votre ménage depuis de %dateBasePretty%?</p> <p>E membres.Length&gt;0</p>                                                     | <p>SINGLE-SELECT anyDeces</p> <p>01 <input type="radio"/> Oui</p> <p>02 <input type="radio"/> Non</p>     |
| <p>Selectionnez les décès:<br/>(Si la personne n'est pas dans la liste, retournez a la [liste des membres](membres) e ajoutez cette personne!)</p> <p>E anyDeces==1</p> | <p>MULTI-SELECT: LINKED deces</p> <p>SOURCE OF CATEGORIES: TEXT LIST QUESTION <a href="#">MEMBRES</a></p> |

DÉCÈS

Roster: DÉCÈS

generated by list question [membres](#)

r\_deces

E deces.Contains(@rowcode)

|                                                                                                                                                                                                                                                                                                                  |                                                                                                                                                                                                                                                                                                                                                                                                                                                                                                                                                             |
|------------------------------------------------------------------------------------------------------------------------------------------------------------------------------------------------------------------------------------------------------------------------------------------------------------------|-------------------------------------------------------------------------------------------------------------------------------------------------------------------------------------------------------------------------------------------------------------------------------------------------------------------------------------------------------------------------------------------------------------------------------------------------------------------------------------------------------------------------------------------------------------|
| <p>Date de Décès - Année</p> <p>V1 self &gt;= dateBase.Value.Year</p> <p>M1 Seulement décès depuis de %dateBasePretty%!&lt;br&gt; Désactivez &lt;font color="blue"&gt;%rosteritle%&lt;/font&gt; dans la liste de décès!</p> <p>V2 self &lt;= dateEntree.Value.Year</p> <p>M2 Ne peut pas être dans l'avenir!</p> | <p>NUMERIC: INTEGER anneeD</p> <p>-----</p>                                                                                                                                                                                                                                                                                                                                                                                                                                                                                                                 |
| <p>Date de Décès - Mois</p> <p>E anneeD!=9999</p>                                                                                                                                                                                                                                                                | <p>SINGLE-SELECT moisD</p> <p>01 <input type="radio"/> Janvier</p> <p>02 <input type="radio"/> Février</p> <p>03 <input type="radio"/> Mars</p> <p>04 <input type="radio"/> Avril</p> <p>05 <input type="radio"/> Mai</p> <p>06 <input type="radio"/> Juin</p> <p>07 <input type="radio"/> Juillet</p> <p>08 <input type="radio"/> Août</p> <p>09 <input type="radio"/> Septembre</p> <p>10 <input type="radio"/> Octobre</p> <p>11 <input type="radio"/> Novembre</p> <p>12 <input type="radio"/> Décembre</p> <p>99 <input type="radio"/> Ne sait pas</p> |

|                                                                                                                                                                                                                                                                                                                                                                                          |                                                                                                                                                                                                                                                                                                                                                                                                                                                                                                                                                                                                                                                                                                                                                                                                                                                                                                                                                                                                                                  |
|------------------------------------------------------------------------------------------------------------------------------------------------------------------------------------------------------------------------------------------------------------------------------------------------------------------------------------------------------------------------------------------|----------------------------------------------------------------------------------------------------------------------------------------------------------------------------------------------------------------------------------------------------------------------------------------------------------------------------------------------------------------------------------------------------------------------------------------------------------------------------------------------------------------------------------------------------------------------------------------------------------------------------------------------------------------------------------------------------------------------------------------------------------------------------------------------------------------------------------------------------------------------------------------------------------------------------------------------------------------------------------------------------------------------------------|
| <div>Date de Décès - Jour</div> <div>F (@optioncode==30 &amp;&amp; moisD!=2)    (@optioncode==31 &amp;&amp; moisD.InList(1,3,5,7,8,10,12))    @optioncode.InRange(1,29)    @optioncode==99</div> <div>E moisD.InRange(1,12)</div> <div>V1 new DateTime((int) anneeD,(int) moisD,jourD==99?1:(int) jourD) &lt;= dateEntree</div> <div>M1 Date de décès ne peut pas être à l'avenir!</div> | <div>SINGLE-SELECT</div> <div>jourD</div> <div><div>01</div><div><div></div></div><div>1</div></div> <div><div>02</div><div><div></div></div><div>2</div></div> <div><div>03</div><div><div></div></div><div>3</div></div> <div><div>04</div><div><div></div></div><div>4</div></div> <div><div>05</div><div><div></div></div><div>5</div></div> <div><div>06</div><div><div></div></div><div>6</div></div> <div><div>07</div><div><div></div></div><div>7</div></div> <div><div>08</div><div><div></div></div><div>8</div></div> <div><div>09</div><div><div></div></div><div>9</div></div> <div><div>10</div><div><div></div></div><div>10</div></div> <div><div>11</div><div><div></div></div><div>11</div></div> <div><div>12</div><div><div></div></div><div>12</div></div> <div><div>13</div><div><div></div></div><div>13</div></div> <div><div>14</div><div><div></div></div><div>14</div></div> <div><div>15</div><div><div></div></div><div>15</div></div> <div><div>16</div><div><div></div></div><div>16</div></div> |
|------------------------------------------------------------------------------------------------------------------------------------------------------------------------------------------------------------------------------------------------------------------------------------------------------------------------------------------------------------------------------------------|----------------------------------------------------------------------------------------------------------------------------------------------------------------------------------------------------------------------------------------------------------------------------------------------------------------------------------------------------------------------------------------------------------------------------------------------------------------------------------------------------------------------------------------------------------------------------------------------------------------------------------------------------------------------------------------------------------------------------------------------------------------------------------------------------------------------------------------------------------------------------------------------------------------------------------------------------------------------------------------------------------------------------------|

[And 16 other symbols \[30\]](#)

Quelle est la cause apparente du décès de %ro  
stertitle%

SINGLE-SELECT

causeDeces

01

☐

une maladie

02

☐

un accident

03

☐

mort naturelle

09

☐

autre cause

88

☐

Ne sais pas

Quelle autre cause?

E causeDeces==9

TEXT

causeDecesAutre

STATIC TEXT

E result==7 && (deces.Length < membres.Length)

***Vous avez dites que tout le ménage est décédé!  
Il faut selectionner tous les membres du ménage.***

Nom du répondant

E anyDeces==1 && (deces.Length < membres.Length)

SINGLE-SELECT: LINKED

repondantDeces

SOURCE OF CATEGORIES: ROSTER [MEMBRE](#)

# TEST GPS

STATIC TEXT

*Vous pouvez utiliser ce test  
pour verifier le GPS da la tablette  
ou pour fair une m sure de GPS pour un Coll gue,  
par exemple si son GPS ne marche pas.*

## Test de GPS

I Utilisez, par exemple, pour faire une mesure GPS pour un coll gue.

GPS

testgps

N

W

A

VARIABLE  
testgps.Latitude.ToString ("#.#####")

STRING

testLat

VARIABLE  
testgps.Longitude.ToString ("#.#####")

STRING

testLon

STATIC TEXT

E IsAnswered(testgps)  
*Latitude: %testLat%*

STATIC TEXT

E IsAnswered(testgps)  
*Longitude: %testLon%*

## APPENDIX A — ENABLING CONDITIONS

### [1] : Nouveau-né %membre%

Enablement Condition:

```
/* only if born after previous census */
ageInMonths1 <=
(CenturyMonthCode(dateEntree.Value.Month, dateEntree.Value.Year) -
CenturyMonthCode(dateBase.Value.Month, dateBase.Value.Year)
- ((dateEntree.Value.Day < dateBase.Value.Day)?1:0))
```

### [2] : Immigration %membre%

Enablement Condition:

```
/* only if born before previous census
(ageInMonths1 >
(CenturyMonthCode(dateEntree.Value.Month, dateEntree.Value.Year) -
CenturyMonthCode(dateBase.Value.Month, dateBase.Value.Year)
- ((dateEntree.Value.Day < dateBase.Value.Day)?1:0)))
*/
/* and not part of the household during the last visit
&& preloadedMember!=1
*/
plusDe2Mois==1
```

## APPENDIX B — VALIDATION CONDITIONS AND MESSAGES

### [1] `qn_height1: Height1 today in centimeter (###,#)`

Validation Condition:

```
// WHO growth standards height for age (0 to 60 months) by sex

sexe==2 ? self.InRange(Height[(int)age_bracket].minF,Height[(int)age_bracket].maxF)
        : self.InRange(Height[(int)age_bracket].minM,Height[(int)age_bracket].maxM)

/*
(self>=43.6 && self<=72.5 && qn04==2 && qn_agec_mo>=0 && qn_agec_mo<=6)
// || (self>=44.2 && self<=74.0 && qn04==1 && qn_agec_mo>=0 && qn_agec_mo<=6)
|| (self.InRange(44.2, 74.0) && qn04==1 && qn_agec_mo>=0 && qn_agec_mo<=6)
|| (self>=60.3 && self<=81.7 && qn04==2 && qn_agec_mo>=7 && qn_agec_mo<=12)
|| (self>=62.7 && self<=82.9 && qn04==1 && qn_agec_mo>=7 && qn_agec_mo<=12)
|| (self>=67.3 && self<=96.1 && qn04==2 && qn_agec_mo>=13 && qn_agec_mo<=24)
|| (self>=69.6 && self<=97.0 && qn04==1 && qn_agec_mo>=13 && qn_agec_mo<=24)
|| (self>=76.8 && self<=106.5 && qn04==2 && qn_agec_mo>=25 && qn_agec_mo<=36)
|| (self>=78.6 && self<=107.2 && qn04==1 && qn_agec_mo>=25 && qn_agec_mo<=36)
|| (self>=84.2 && self<=115.7 && qn04==2 && qn_agec_mo>=37 && qn_agec_mo<=48)
|| (self>=85.5 && self<=115.9 && qn04==1 && qn_agec_mo>=37 && qn_agec_mo<=48)
|| (self>=90.3 && self<=123.7 && qn04==2 && qn_agec_mo>=49 && qn_agec_mo<=60)
|| (self>=91.2 && self<=123.9 && qn04==1 && qn_agec_mo>=49 && qn_agec_mo<=60)
*/
```

Validation Message: Please check height - is this value correct?

### [2] `qn_weight1: Weight1 today in kilogram (##,#)`

Validation Condition:

```
// WHO growth standards weight for age (0 to 5 years) by sex
sexe==2 ? self.InRange(Weight[(int)age_bracket].minF,Weight[(int)age_bracket].maxF)
        : self.InRange(Weight[(int)age_bracket].minM,Weight[(int)age_bracket].maxM)

/*
(self.InRange(2,10.6) && qn04==2 && qn_agec_mo>=0 && qn_agec_mo<=6)
|| (self.InRange(2.1, 10.9) && qn04==1 && qn_agec_mo>=0 && qn_agec_mo<=6)
|| (self.InRange(5.3,13.1) && qn04==2 && qn_agec_mo>=7 && qn_agec_mo<=12)
|| (self.InRange(5.9, 13.3) && qn04==1 && qn_agec_mo>=7 && qn_agec_mo<=12)
|| (self.InRange(6.4,17.0) && qn04==2 && qn_agec_mo>=13 && qn_agec_mo<=24)
|| (self.InRange(7.1,17.1) && qn04==1 && qn_agec_mo>=13 && qn_agec_mo<=24)
|| (self.InRange(8.2,20.9) && qn04==2 && qn_agec_mo>=25 && qn_agec_mo<=36)
|| (self.InRange(8.8,20.7) && qn04==1 && qn_agec_mo>=25 && qn_agec_mo<=36)
|| (self.InRange(9.7,25.2) && qn04==2 && qn_agec_mo>=37 && qn_agec_mo<=48)
|| (self.InRange(10.1,24.2) && qn04==1 && qn_agec_mo>=37 && qn_agec_mo<=48)
|| (self.InRange(11.0,29.5) && qn04==2 && qn_agec_mo>=49 && qn_agec_mo<=60)
|| (self.InRange(11.3,27.9) && qn04==1 && qn_agec_mo>=49 && qn_agec_mo<=60)
*/
```

Validation Message: Please check weight - is this value correct?

## APPENDIX C — CATEGORIES

### [1] [villages](#)

Categories: 2: Toni, 5: Boron, 8: Cissé, 9: Dankoumana, 10: Dembeléla, 11: Denissa, 12: Denissa Mossi, 14: Dionkongo, 15: Dina, 16: Dokoura, 17: Goni, 18: Kamadena, 19: Kèmena, 21: Koro, 23: Leï, 27: Ouetté, 28: Pa, 29: Sampopo, 30: Seriba, 31: Sien, 33: Sobon, 34: Solimana, 36: Tebére, 37: Tonséré, 39: Tissu, 40: Dara, 41: Bankoumani, 42: Nouna, 43: Babekolon, 44: Bagala, 45: Biron badala, 46: Bissau, 47: Bokuy, 48: Damandigui, 49: Hinkuy, 51: Kansara, 52: Kéréna, 53: Konkuini, 54: Korédougou, 55: Moinsi, 56: Mourdié, 57: Sèrè, 58: Soin, 59: Tonkoroni, 1: Barakuy, 3: Biron-Bobo, 4: Biron-Marka, 6: Bouni/Bouné, 7: Bourasso, 13: Diamasso, 20: Kodougou, 22: Labarani, 24: Lekuy, 25: Lemini, 26: Nokuy, 32: Sikoro, 35: Sirakoro/Sirakorosso, 38: Zanakuy, 50: Kamiankoro

### [2] [vill: Village](#)

Categories: 2: Toni, 5: Boron, 8: Cissé, 9: Dankoumana, 10: Dembeléla, 11: Denissa, 12: Denissa Mossi, 14: Dionkongo, 15: Dina, 16: Dokoura, 17: Goni, 18: Kamadena, 19: Kèmena, 21: Koro, 23: Leï, 27: Ouetté, 28: Pa, 29: Sampopo, 30: Seriba, 31: Sien, 33: Sobon, 34: Solimana, 36: Tebére, 37: Tonséré, 39: Tissu, 40: Dara, 41: Bankoumani, 42: Nouna, 43: Babekolon, 44: Bagala, 45: Biron badala, 46: Bissau, 47: Bokuy, 48: Damandigui, 49: Hinkuy, 51: Kansara, 52: Kéréna, 53: Konkuini, 54: Korédougou, 55: Moinsi, 56: Mourdié, 57: Sèrè, 58: Soin, 59: Tonkoroni, 1: Barakuy, 3: Biron-Bobo, 4: Biron-Marka, 6: Bouni/Bouné, 7: Bourasso, 13: Diamasso, 20: Kodougou, 22: Labarani, 24: Lekuy, 25: Lemini, 26: Nokuy, 32: Sikoro, 35: Sirakoro/Sirakorosso, 38: Zanakuy, 50: Kamiankoro

### [3] [q200: Le ménage possède-t-il un de ces équipements?](#)

Categories: 201: RADIO, 202: TELEVISEUR, 203: LECTEUR VIDEO/CD/DVD, 204: TELEPHONE FIXE, 205: TELEPHONE PORTABLE, 218: MOTO, 219: TRICYCLE, 220: BICYCLETTE (VÉLO), 206: REFRIGERATEUR / CONGELATEUR, 208: PLAQUE A GAZ, 209: CUISINIÈRE, 210: RECHAUD A PETROLE / GAZ, 211: PLAQUE ELECTRIQUE, 212: PLAQUE SOLAIRE, 213: GROUPE ELECTROGENE, 214: LAMPE SOLAIRE, 215: LAMPE A PETROLE, 216: LAMPE A GAZ, 224: CLÉ USB, 225: BOOMER (BOOMBOX), 217: VOITURE, 221: CHARRETTE (2 roues), 226: CHARIOT (4 roues), 222: ORDINATEUR BUREAU, 223: ORDINATEUR PORTABLE

### [4] [parente: Lien de parenté avec CM](#)

Categories: 1546: Chef de ménage, 3108: Epouse/époux, 1720: Coépouse, 3599: Fils/fille, 3042: Enfant adopté/confié, 3826: Frère/sœur, 10157: Père /mère, 10275: Petit Fils/fille, 8913: Neveu/niece, 9804: Oncle/tante, 3047: Enfant conjoint(e), 4446: Grand-père/grand-mère, 4173: Gendre/belle fille, 823: Beau-frère/belle sœur, 539: Autre parent, 531: Aucun lien, 9271: Ne sais pas

### [5] [jourN: Date de Naissance - Jour](#)

Categories: 1: 1, 2: 2, 3: 3, 4: 4, 5: 5, 6: 6, 7: 7, 8: 8, 9: 9, 10: 10, 11: 11, 12: 12, 13: 13, 14: 14, 15: 15, 16: 16, 17: 17, 18: 18, 19: 19, 20: 20, 21: 21, 22: 22, 23: 23, 24: 24, 25: 25, 26: 26, 27: 27, 28: 28, 29: 29, 30: 30, 31: 31, 99: Ne sait pas

### [6] [classe: Dernière classe fréquenté](#)

Categories: 1: PS1, 2: PS2, 3: PS3, 4: PR1, 5: PR2, 6: PR3, 7: PR4, 8: PR5, 9: PR6, 10: SE1, 11: SE2, 12: SE3, 13: SE4, 14: SE5, 15: SE6, 16: SE7, 17: SU1, 18: SU2, 19: SU3, 20: SU4, 21: SU5, 22: SU6, 23: SU7, 24: SU8, 25: SU9, 26: CA1, 27: CA2, 28: CA3, 29: BE1, 30: BE2, 31: CB1, 32: CB2, 33: CB3, 34: CB4

### [7] [prevClasse: Dernière classe fréquenté](#)

Categories: 1: PS1, 2: PS2, 3: PS3, 4: PR1, 5: PR2, 6: PR3, 7: PR4, 8: PR5, 9: PR6, 10: SE1, 11: SE2, 12: SE3, 13: SE4, 14: SE5, 15: SE6, 16: SE7, 17: SU1, 18: SU2, 19: SU3, 20: SU4, 21: SU5, 22: SU6, 23: SU7, 24: SU8, 25: SU9, 26: CA1, 27: CA2, 28: CA3, 29: BE1, 30: BE2, 31: CB1, 32: CB2, 33: CB3, 34: CB4

### [8] [occupation: Occupation principale](#)

Categories: 1: Agriculture, 2: Apiculture, 3: Berger, 4: Boucher, 5: Cathéchiste, 6: Chauffeur, 7: Coiffeur, 8: Commerce, 9: Cordonnier, 10: Cuisinier, 11: Dolotière, 12: Elève/Écolier/Étudiant, 13: Elevage, 14: Forgeron/ FGR=FOR, 15: Fileuse, 16: Fonc. public, 17: Gardien, 18: Griot, 19: Jardinier, 20: Maçon(nerie), 21: Marabout, 22: Ménagère, 23: Pêcheur, 24: Potier(ie), 25: Puisatier, 26: Tailleur, 27: Teinturier, 28: Tissérand, 29: Vanier, 30: Neant, 31: Marab./Maçon, 32: Autre Fonct, 33: Aucun, 34: Secrétaire, 35: Gendarme, 36: Policier/ POL=PLC, 37: Mécanicien, 38: Garagiste, 39: Ouvrier, 40: Comptable, 41: Agent de Recherche, 42: Missionnaire, 43: Gestionnaire, 44: Entrepreneur, 45: Boulanger, 46: Bijoutier, 47: Plombier, 48: Institutteur, 49: Profess/secondaire, 50: Profess/supérieur, 51: Médecin, 52: Infirmier, 53: Matrone, 54: Sage femme, 55: Agt santé villageois, 56: Pharmacien, 57: Guérisseur, 58: Policier, 59: Menuisier, 60: Apprenti, 61: Cçant de mchde diver, 62: Cçant légume/condime, 63: Cçant de bétail, 64: Cçant de céréales, 65: Cçant de Volailles, 66: Cçant Beurre karité, 67: Cçant tissus/pagnes, 90: Retraité, 95: Défaut, 97: Non applic, 98: Sans info, 68: Autre artisan, 69: Travailleur du Privé, 99: ne sait pas - NSP, 96: Autres

### [9] [residPereVill: A quel village?](#)

Categories: 2: Toni, 5: Boron, 8: Cissé, 9: Dankoumana, 10: Dembeléla, 11: Denissa, 12: Denissa Mossi, 14: Dionkongo, 15: Dina, 16: Dokoura, 17: Goni, 18: Kamadena, 19: Kèmena, 21: Koro, 23: Leï, 27: Ouetté, 28: Pa, 29: Sampopo, 30: Seriba, 31: Sien, 33: Sobon, 34: Solimana, 36: Tebére, 37: Tonséré, 39: Tissu, 40: Dara, 41: Bankoumani, 42: Nouna, 43: Babekolon, 44: Bagala, 45: Biron badala, 46: Bissau, 47: Bokuy, 48: Damandigui, 49: Hinkuy, 51: Kansara, 52: Kéréna, 53: Konkuini, 54: Korédougou, 55: Moinsi, 56: Mourdié, 57: Sèrè, 58: Soin, 59: Tonkoroni, 1: Barakuy, 3: Biron-Bobo, 4: Biron-Marka, 6: Bouni/Bouné, 7: Bourasso, 13: Diamasso, 20: Kodougou, 22: Labarani, 24: Lekuy, 25: Lemini, 26: Nokuy, 32: Sikoro, 35: Sirakoro/Sirakorosso, 38: Zanakuy, 50: Kamiankoro

### [10] [villAccouchement: A quel village?](#)

Categories: 2: Toni, 5: Boron, 8: Cissé, 9: Dankoumana, 10: Dembeléla, 11: Denissa, 12: Denissa Mossi, 14: Dionkongo, 15: Dina, 16: Dokoura, 17: Goni, 18: Kamadena, 19: Kèmena, 21: Koro, 23: Leï, 27: Ouetté, 28: Pa, 29: Sampopo, 30: Seriba, 31: Sien,

33: Sobon, 34: Solimana, 36: Tebére, 37: Tonséré, 39: Tissu, 40: Dara, 41: Bankoumani, 42: Nouna, 43: Babekolon, 44: Bagala, 45: Biron badala, 46: Bissau, 47: Bokuy, 48: Damandigui, 49: Hinkuy, 51: Kansara, 52: Kéréna, 53: Konkuini, 54: Korédougou, 55 : Moinsi, 56: Mourié, 57: Sèrè, 58: Soïn, 59: Tonkoroni, 1: Barakuy, 3: Biron-Bobo, 4: Biron-Marka, 6: Bouni/Bouné, 7: Bourasso, 13: Diamasso, 20: Kodougou, 22: Labarani, 24: Lekuy, 25: Lemini, 26: Nokuy, 32: Sikoro, 35: Sirakoro/Sirakorosso, 38: Zanakuy, 50: Kamiankoro

[11] **produit:** <font color="blue"> %membre% </font> a cultivé l'un des produits agricoles énoncés au cours de la campagne passée?

Categories: 1: Arachides et sous produits, 2: Calebasses (entières, 3: Chou, 4: Coton et sous produits, 5: Fonio, 6: Cultures fruitières, 7: Igname, 8: Mais et sous produits, 9: Mil/ sorgho et sous produits, 10: Niébé et sous produits, 11: Oignon, 12: Oseille et sous produit s, 13: Pastèque, 14: Pomme de terre, 15: Pois de terre et sous produits, 16: Riz et sous produits, 17: Sésame, 18: Patate douce, 19: Tabac, 20: Tomate, 21: Salade, 22: Aubergine, 23: Courgette, 24: Comcombre, 25: Autres cultures

[12] **produitVendu:** <font color="blue"> %membre% </font> a vendu des produits agropastoraux énoncés au cours du mois passé et des 5 mois précédent le mois passé?

Categories: 1: Arachides et sous produits, 2: Calebasses (par moitié), 3: Chou, 4: Coton et sous produits, 5: Fonio, 6: Cultures fruitière s, 7: Igname, 8: Mais et sous produits, 9: Sorgho et sous produits, 38: Petit mil et sous produits, 10: Niébé et sous produits, 11: Oigno n, 12: Oseille et sous produits, 13: Pastèque, 14: Pomme de terre, 15: Pois de terre et sous-produits, 16: Riz et sous produits, 17: Sés ame, 18: Patate douce, 19: Tabac, 20: Tomates, 21: Salade, 22: Aubergine, 23: Courgette, 24: Comcombre, 25: Autres cultures, 26: Karité (amandes et beurre), 27: Néré (grains et soumbala, 28: Autres produits de la cueillette (tamarin, miel et de la chasse, 29: Vente de bovins (famille du bœuf), 30: Vente de caprins (famille de la chèvre), 31: Vente d'ovins (famille du mouton), 32: Vente de porcins (famille du porc), 33: Vente d'asins (famille de l'âne), 34: Vente de volailles (poulets, pintades, canards), 35: Vente d'autres animaux (pigeons, lapin s, ...), 36: Vente de produits d'animaux (œufs, lait, peau, etc.), 37: Vente de produits de pêche (poissons, ...)

[13] **depenseMembre:** <font color="blue"> %membre% </font> avez vous dépensé de l'argent pour l'un ou plusieurs des motifs suivants dans les 6 mois passé?

Categories: 1: Loyer, 2: Electricité, 3: Téléphone, 4: Matériaux de construction (tôles, briques, seccos, ...), 5: Boissons ou eau, 6: Vivres (céréales, condiments, ...), 7: Ticket de transport ou Carburant, 8: Achat ou réparation d'un moyen de transport, 9: Scolarisation, Education , Alphabétisation, 10: Vêtements, 11: Soins médicaux, 12: Assurance maladie (AMBC), 13: Engrais, pesticide, 14: Outils agricoles ou fra is de réparation d'outils agricoles, 15: Animaux, 16: Dépenses religieuses, 17: Fêtes, cérémonies (funérailles, mariage, ...), 18: Pétrole, 19: Tabac, cola, 20: Envoi d'argent à un parent / ami, 21: Remboursement de crédit(s), 22: Autres motifs, 23: Néant

[14] **codeMaladieChronique:** <font color="blue"> Enquêteur: </font> Sélectionnez la maladie dans la liste

Categories: 100: Maladies ou infections pulmonaires chroniques (poumons), 101: Asthme, 102: Tuberculose, 103: Maladies ou infections oculaires chroniques (œil), 104: Conjonctivite chronique, 105: Borgne, 106: Carence en vitamine A (avitaminose A), 107: Cataracte, 108 : Cécité / Aveugle, 109: Cécité nocturne ou crépusculaire, 110: Onchocercose (cécité des rivières), 111: Tension de l'œil (glaucome), 112 : Trachome, 113: Maladies ou infections dermatologiques chroniques (peau), 114: Gale, 115: Teignes (dermatophyties), 116: Maladies ou infections gastro-intestinales chroniques (estomac, intestins), 117: Dysentérie chronique, 118: Amibiase, 119: Shigellose, 120: Maladi es ou infections rénales chroniques (reins), 121: Glomérulonéphrite chronique, 122: Insuffisance rénale chronique, 123: Syndrome néphro tique, 124: Maladies cardiologiques (cœur), 125: Insuffisance cardiaque, 126: Maladies ou infections hépatiques (foie), 127: Cirrhose, 128: Hépatite, 129: Maladies mentales, 130: Folie, 131: Cancers, 132: Cancer (tumeur maligne) du foie, 133: Cancer (tumeur maligne) de la langue, 134: Cancer (tumeur maligne) de la peau, 135: Cancer (tumeur maligne) des organes génitaux, 136: Cancer (tumeur malign e) des voies respiratoires, 137: Cancer (tumeur maligne) du sein, 138: Cancer du cerveau (tumeur maligne cérébrale), 139: Cancer du sys tème digestif (tumeur maligne digestive), 140: Autres cancers : A préciser dans Col. 4, 141: Alcoolisme, 142: Bilharziose, 143: Diabète, 144: Drépanocytose, 145: Éléphantiasis (filariose lymphatique), 146: Epilepsie, 147: Gangrène, 148: Goitre (nodule thyroïdien), 149: H ernie, 150: Hypertension artérielle, 151: Hypertension artérielle de la grossesse, 152: Lèpre, 153: Maladie du sommeil (trypanosomiase africaine), 154: Malnutrition de l'enfant ou de l'adulte, 155: Malnutrition du nouveau né, 156: Paralysie, 157: Pré-éclampsie, 158: Rhum atisme, 159: Séquelles d'une morsure de scorpion, 160: Séquelles d'une morsure de serpent, 161: Sida, 162: Stérilité, 163: Surdité, 164: Ver de guinée (dracunculose), 165: Autres maladies chroniques, 999: Ne sait pas

[15] **jourMC:** Jour

Categories: 1: 1, 2: 2, 3: 3, 4: 4, 5: 5, 6: 6, 7: 7, 8: 8, 9: 9, 10: 10, 11: 11, 12: 12, 13: 13, 14: 14, 15: 15, 16: 16, 17: 17, 18: 18, 19: 19, 20: 20, 21: 21, 22: 22, 23: 23, 24: 24, 25: 25, 26: 26, 27: 27, 28: 28, 29: 29, 30: 30, 31: 31, 99: Ne sait pas

[16] **codeMaladieAigue:** Sélectionnez la maladie

Categories: 200: Maladies ou infections pulmonaires aiguës (poumons), 201: Bronchiolite, 202: Bronchite, 203: Pneumonie, 204: Malad ies ou infections respiratoires hautes aiguës (gorge, nez, oreilles), 205: Coqueluche, 206: Grippe, 207: Infections de la gorge (laryngite, an gine ...), 208: Infections de l'oreille (otites, ...), 209: Infections du nez, 210: Oreillons, 211: Rhume, 212: Maladies ou infections oculaires aiguës (œil), 213: Conjonctivite à chlamydiae appelée 'Apollo', 214: Conjonctivite aigue, 215: Trachome, 216: Maladies ou infections der matologiques aiguës (peau), 217: Gale, 218: Teignes (dermatophyties), 219: Maladies ou infections gastro-intestinales aiguës (estomac, in testins), 220: Dysentérie aiguë, 221: Amibiase, 222: Choléra, 223: Hémorragie gastro-intestinale, 224: Shigellose, 225: Maladies ou i nfections rénales aiguës (reins), 226: Glomérulonéphrite aiguë, 227: Insuffisance rénale aiguë, 228: Maladies ou infections aigues de la fe mme enceinte, 229: Convulsions (éclampsie), 230: Hémorragie avant l'accouchement, 231: Autres complications avant l'accouchement, 232: Accouchement difficile (dystocie), 233: Travail prolongé lors de l'accouchement, 234: Autres complications au cours de l'accouchement , 235: Hémorragie après l'accouchement, 236: Fièvre suite à l'accouchement (puerpérale), 237: Infection inflammatoire de l'utérus (endo métrite), 238: Autres complications après l'accouchement, 239: Complications d'avortement, 240: Complications d'une grossesse jumelair e ou multiple, 241: Maladies ou infections aigues du nouveau né, 242: Asphyxie du nouveau né à la naissance, 243: Hémorragie de l'ombili c du nouveau né, 244: Infection de l'ombilic du nouveau né, 245: Jaunisse (ictère) du nouveau né, 246: Malformation du nouveau né, 247: Mort né, 248: Petit poids de naissance, 249: Prématuro, 250: Souffrance du nouveau né à la naissance, 251: Tétanos du nouveau né, 252: Autres maladies du nouveau né, 253: Accident vasculaire cérébral (AVC), 254: Arrêt cardiaque / Crise cardiaque (infarctus cardiaque), 255: Bilharziose, 256: Fièvre jaune, 257: Fièvre typhoïde, 258: Gangrène, 259: Hernie, 260: Intoxication alimentaire, 261: Intoxication d'origine inconnue, 262: Intoxication par un poison / Empoisonnement, 263: Méningite, 264: Morsure de serpent, 265: Occlusion intestin ale, 266: Œdème aigue du poumon, 267: Paludisme de type non précisé (on ne sait pas si simple ou grave), 268: Paludisme grave confirm

é par un examen biologique au laboratoire , 269: Paludisme grave non confirmé par un examen biologique au laboratoire , 270: Paludisme simple confirmé par un examen biologique au laboratoire , 271: Paludisme simple non confirmé par un examen biologique au laboratoire , 272: Piqûre de scorpion , 273: Piqûre d'insecte , 274: Polio (poliomyélite) , 275: Rage , 276: Rougeole , 277: Tétanos (enfant et adulte) , 278: Trismus par accident , 279: Varicelle , 280: Autre maladie aiguë , 999: Ne sait pas

[17] [jourMA: Jour](#)

Categories: 1: 1, 2: 2, 3: 3, 4: 4, 5: 5, 6: 6, 7: 7, 8: 8, 9: 9, 10: 10, 11: 11, 12: 12, 13: 13, 14: 14, 15: 15, 16: 16, 17: 17, 18: 18, 19: 19, 20: 20, 21: 21, 22: 22, 23: 23, 24: 24, 25: 25, 26: 26, 27: 27, 28: 28, 29: 29, 30: 30, 31: 31, 99: Ne sait pas

[18] [jourCrisesMACesse: Jour](#)

Categories: 1: 1, 2: 2, 3: 3, 4: 4, 5: 5, 6: 6, 7: 7, 8: 8, 9: 9, 10: 10, 11: 11, 12: 12, 13: 13, 14: 14, 15: 15, 16: 16, 17: 17, 18: 18, 19: 19, 20: 20, 21: 21, 22: 22, 23: 23, 24: 24, 25: 25, 26: 26, 27: 27, 28: 28, 29: 29, 30: 30, 31: 31, 99: Ne sait pas

[19] [symptoms: De quels symptômes souffrez-vous à cause de votre maladie chronique?](#)

Categories: 0: NON APPLICABLE, 1: Abcès, 2: Anémie, 3: Bouche fermée, crispée, 4: Boutons, 5: Boutons sur tout le corps, 6: Constipation, 7: Convulsions, 8: Corps chaud, 9: Corps enflé (œdème général), 10: Coup rejeté en arrière, 11: Démangeaisons (prurit), 12: Déshydratation, 13: Diarrhée aiguë, 14: Diarrhée chronique, 15: Difficultés à respirer (dyspnée), 16: Douleur au moment des selles, 17: Douleur en urinant, 18: Douleurs du bas ventre (douleurs pelviennes), 19: Écoulement urétral chez l'homme, 20: Évanouissement, 21: Faiblesse, 22: Fatigue (asthénie), 23: Fièvre, 24: Fièvre intermittente, 25: Fièvre très forte, 26: Fissure anale, 27: Frisson, 28: Hémorroïdes, 29: Hoquet, 30: Jambe, pied enflée (œdème du pied, de la jambe), 31: Jaunisse (ictère), 32: Mal à la bouche, 33: Mal à la gorge, 34: Mal à la tête (céphalée), 35: Mal à l'oreille, 36: Mal au foie, 37: Mal au rein, 38: Mal au ventre, 39: Mal aux côtes, 40: Mal aux dents, 41: Mal aux os et/ou articulations, 42: Mal aux yeux, 43: Mal de cœur, 44: Mal de dos, 45: Manque ou perte d'appétit, 46: Ne jouait plus, 47: Ne tétait plus, 48: Nez bouché, 49: Nez qui coule, 50: Palpitation du cœur, 51: Perte de poids, 52: Pertes vaginales blanches de la femme, 53: Plaie aiguë, 54: Plaie chronique, 55: Plaies sur les organes génitaux de l'homme ou de la femme, 56: Raideur du cou, 57: Règles douloureuses, 58: Respiration bruyante, 59: Respiration rapide, 60: Saignement vaginal, 61: Sang dans les crachats (hémoptysie), 62: Sang dans les selles, 63: Sang dans les urines (hématurie), 64: Sensation de chaleur, 65: Sensation de froid, 66: Toux, 67: Toux grasse, 68: Toux sèche, 69: Transpiration, 70: Troubles de la vision (difficultés pour voir), 71: Troubles mentaux, 72: Vertiges, 73: Visage enflé (œdème du visage), 74: Vomissements, 75: Yeux jaunes, 76: Yeux larmoyants, 77: Yeux rouges, 78: Autres symptômes

[20] [symptomsMA: Quels symptômes avez-vous ressenti au cours de cette maladie?](#)

Categories: 0: NON APPLICABLE, 1: Abcès, 2: Anémie, 3: Bouche fermée, crispée, 4: Boutons, 5: Boutons sur tout le corps, 6: Constipation, 7: Convulsions, 8: Corps chaud, 9: Corps enflé (œdème général), 10: Coup rejeté en arrière, 11: Démangeaisons (prurit), 12: Déshydratation, 13: Diarrhée aiguë, 14: Diarrhée chronique, 15: Difficultés à respirer (dyspnée), 16: Douleur au moment des selles, 17: Douleur en urinant, 18: Douleurs du bas ventre (douleurs pelviennes), 19: Écoulement urétral chez l'homme, 20: Évanouissement, 21: Faiblesse, 22: Fatigue (asthénie), 23: Fièvre, 24: Fièvre intermittente, 25: Fièvre très forte, 26: Fissure anale, 27: Frisson, 28: Hémorroïdes, 29: Hoquet, 30: Jambe, pied enflée (œdème du pied, de la jambe), 31: Jaunisse (ictère), 32: Mal à la bouche, 33: Mal à la gorge, 34: Mal à la tête (céphalée), 35: Mal à l'oreille, 36: Mal au foie, 37: Mal au rein, 38: Mal au ventre, 39: Mal aux côtes, 40: Mal aux dents, 41: Mal aux os et/ou articulations, 42: Mal aux yeux, 43: Mal de cœur, 44: Mal de dos, 45: Manque ou perte d'appétit, 46: Ne jouait plus, 47: Ne tétait plus, 48: Nez bouché, 49: Nez qui coule, 50: Palpitation du cœur, 51: Perte de poids, 52: Pertes vaginales blanches de la femme, 53: Plaie aiguë, 54: Plaie chronique, 55: Plaies sur les organes génitaux de l'homme ou de la femme, 56: Raideur du cou, 57: Règles douloureuses, 58: Respiration bruyante, 59: Respiration rapide, 60: Saignement vaginal, 61: Sang dans les crachats (hémoptysie), 62: Sang dans les selles, 63: Sang dans les urines (hématurie), 64: Sensation de chaleur, 65: Sensation de froid, 66: Toux, 67: Toux grasse, 68: Toux sèche, 69: Transpiration, 70: Troubles de la vision (difficultés pour voir), 71: Troubles mentaux, 72: Vertiges, 73: Visage enflé (œdème du visage), 74: Vomissements, 75: Yeux jaunes, 76: Yeux larmoyants, 77: Yeux rouges, 78: Autres symptômes

[21] [QA35: Quelles des céréales suivantes complémentaire vous avez acheté pour nourrir votre famille?](#)

Categories: 1: Sorgho, 2: Riz, 3: Fonio, 4: Maïs, 5: Petit mil, 6: Blé, 7: Haricot, 8: Arachide, 9: soja, 10: Patate douce, 11: Igname, 12: Manioc, 13: Banane, 14: pomme de terre, 15: oseille/bissap, 16: sésame, 17: produits maraichers

[22] [QCS: Votre ménage a-t-il cultivé les cultures suivantes <u>a la campagne précédente</u>?](#)

Categories: 1: Sorgho, 2: Petit mil, 3: Maïs, 4: Arachides, 5: Riz, 6: Oseille/bissap, 7: Blé, 8: Manioc, 9: Pommes de terre, 10: Cotton, 11: Sésame, 12: Fonio, 13: Haricots, 14: Petits poids, 15: Soja, 16: Patate douce, 17: Igname, 18: Banane, 19: Produits maraichers

[23] [culturesDuChamp: Listez les cultures que le ménage a cultivé sur le <font color="blue">%lesChamps%</font> <u>a la campagne précédente</u>](#)

Categories: 1: Sorgho, 2: Petit mil, 3: Maïs, 4: Arachides, 5: Riz, 6: Oseille/bissap, 7: Blé, 8: Manioc, 9: Pommes de terre, 10: Cotton, 11: Sésame, 12: Fonio, 13: Haricots, 14: Petits poids, 15: Soja, 16: Patate douce, 17: Igname, 18: Banane, 19: Produits maraichers

[24] [jourE: Date de l'émigration - Jour](#)

Categories: 1: 1, 2: 2, 3: 3, 4: 4, 5: 5, 6: 6, 7: 7, 8: 8, 9: 9, 10: 10, 11: 11, 12: 12, 13: 13, 14: 14, 15: 15, 16: 16, 17: 17, 18: 18, 19: 19, 20: 20, 21: 21, 22: 22, 23: 23, 24: 24, 25: 25, 26: 26, 27: 27, 28: 28, 29: 29, 30: 30, 31: 31, 99: Ne sait pas

[25] [jourER: Date %returned% de Retour - Jour](#)

Categories: 1: 1, 2: 2, 3: 3, 4: 4, 5: 5, 6: 6, 7: 7, 8: 8, 9: 9, 10: 10, 11: 11, 12: 12, 13: 13, 14: 14, 15: 15, 16: 16, 17: 17, 18: 18, 19: 19, 20: 20, 21: 21, 22: 22, 23: 23, 24: 24, 25: 25, 26: 26, 27: 27, 28: 28, 29: 29, 30: 30, 31: 31, 99: Ne sait pas

[26] [villDestination: A quel village?](#)

Categories: 2: Toni, 5: Boron, 8: Cissé, 9: Dankoumana, 10: Dembeléla, 11: Denissa, 12: Denissa Mossi, 14: Dionkongo, 15: Dina

, 16: Dokoura , 17: Goni , 18: Kamadena , 19: Kèmena , 21: Koro , 23: Leï , 27: Ouetté , 28: Pa , 29: Sampopo , 30: Seriba , 31: Sien , 33: Sobon , 34: Solimana , 36: Tebére , 37: Tonséré , 39: Tissi , 40: Dara , 41: Bankoumani , 42: Nouna , 43: Babekolon , 44: Bagala , 45: Biron badala , 46: Bissau , 47: Bokuy , 48: Damandigui , 49: Hinkuy , 51: Kansara , 52: Kéréna , 53: Konkuini , 54: Korédougou , 55 : Moinsi , 56: Mourdié , 57: Sèrè , 58: Soin , 59: Tonkoroni , 1: Barakuy , 3: Biron-Bobo , 4: Biron-Marka , 6: Bouni/Bouné , 7: Bourasso , 13: Diamasso , 20: Kodougou , 22: Labarani , 24: Lekuy , 25: Lemini , 26: Nokuy , 32: Sikoro , 35: Sirakoro/Sirakorosso , 38: Zanakuy , 50: Kamiankoro

[27] [jourI: Date de l'immigration - Jour](#)

Categories: 1: 1 , 2: 2 , 3: 3 , 4: 4 , 5: 5 , 6: 6 , 7: 7 , 8: 8 , 9: 9 , 10: 10 , 11: 11 , 12: 12 , 13: 13 , 14: 14 , 15: 15 , 16: 16 , 17: 17 , 18: 18 , 19: 19 , 20: 20 , 21: 21 , 22: 22 , 23: 23 , 24: 24 , 25: 25 , 26: 26 , 27: 27 , 28: 28 , 29: 29 , 30: 30 , 31: 31 , 99: Ne sait pas

[28] [jourIR: Date %left% de Départ - Jour](#)

Categories: 1: 1 , 2: 2 , 3: 3 , 4: 4 , 5: 5 , 6: 6 , 7: 7 , 8: 8 , 9: 9 , 10: 10 , 11: 11 , 12: 12 , 13: 13 , 14: 14 , 15: 15 , 16: 16 , 17: 17 , 18: 18 , 19: 19 , 20: 20 , 21: 21 , 22: 22 , 23: 23 , 24: 24 , 25: 25 , 26: 26 , 27: 27 , 28: 28 , 29: 29 , 30: 30 , 31: 31 , 99: Ne sait pas

[29] [villProvenance: De quel village?](#)

Categories: 2: Toni , 5: Boron , 8: Cissé , 9: Dankoumana , 10: Dembeléla , 11: Denissa , 12: Denissa Mossi , 14: Dionkongo , 15: Dina , 16: Dokoura , 17: Goni , 18: Kamadena , 19: Kèmena , 21: Koro , 23: Leï , 27: Ouetté , 28: Pa , 29: Sampopo , 30: Seriba , 31: Sien , 33: Sobon , 34: Solimana , 36: Tebére , 37: Tonséré , 39: Tissi , 40: Dara , 41: Bankoumani , 42: Nouna , 43: Babekolon , 44: Bagala , 45: Biron badala , 46: Bissau , 47: Bokuy , 48: Damandigui , 49: Hinkuy , 51: Kansara , 52: Kéréna , 53: Konkuini , 54: Korédougou , 55 : Moinsi , 56: Mourdié , 57: Sèrè , 58: Soin , 59: Tonkoroni , 1: Barakuy , 3: Biron-Bobo , 4: Biron-Marka , 6: Bouni/Bouné , 7: Bourasso , 13: Diamasso , 20: Kodougou , 22: Labarani , 24: Lekuy , 25: Lemini , 26: Nokuy , 32: Sikoro , 35: Sirakoro/Sirakorosso , 38: Zanakuy , 50: Kamiankoro

[30] [jourD: Date de Décès - Jour](#)

Categories: 1: 1 , 2: 2 , 3: 3 , 4: 4 , 5: 5 , 6: 6 , 7: 7 , 8: 8 , 9: 9 , 10: 10 , 11: 11 , 12: 12 , 13: 13 , 14: 14 , 15: 15 , 16: 16 , 17: 17 , 18: 18 , 19: 19 , 20: 20 , 21: 21 , 22: 22 , 23: 23 , 24: 24 , 25: 25 , 26: 26 , 27: 27 , 28: 28 , 29: 29 , 30: 30 , 31: 31 , 99: Ne sait pas

## APPENDIX D — VARIABLES

[1] [age:](#)

```
IsAnswered(reportedAge) ? reportedAge : ( moisN==99 ? FullYearsBetween(new DateTime((int) anneeN,7,1), dateEntree) : ( jourN==99 ?  
FullYearsBetween(new DateTime((int) anneeN,(int) moisN,15), dateEntree) : FullYearsBetween(new DateTime((int) anneeN,(int) moisN,(int)  
jourN), dateEntree) ))
```

[2] [ageInMonths1:](#)

```
IsAnswered(reportedAge) ? (long) reportedAge*12 : CenturyMonthCode(dateEntree.Value.Month, dateEntree.Value.Year) - // if don't know  
month, use June CenturyMonthCode((moisN==99?6:(int) moisN), (int) anneeN) // if don't know day, use 15th - ((dateEntree.Value.Day <  
(jourN==99 || moisN==99 ? 15 : (int)jourN))?1:0)
```

[3] [months\\_Deceased:](#)

```
CenturyMonthCode(dateEntree.Value.Month, dateEntree.Value.Year) - // if don't know month, use current month  
CenturyMonthCode((moisD==99?dateEntree.Value.Month:(int) moisD), (int) anneeD) // if don't know day, use current day -  
((dateEntree.Value.Day < (jourD==99 || moisD==99 ? dateEntree.Value.Day : (int)jourD))?1:0)
```

## APPENDIX E — CATEGORIES FILTERS

### [1] classe: Dernière classe fréquenté

```
niveauEducation==1 ? @optioncode.InRange(1,3) : niveauEducation==2 ? @optioncode.InRange(4,13) : niveauEducation==3 ?  
@optioncode.InRange(14,16) : niveauEducation==4 ? @optioncode.InRange(17,25) : niveauEducation==5 ? @optioncode.InRange(26,30) :  
niveauEducation==6 ? @optioncode.InRange(31,34) : false
```

### [2] prevClasse: Dernière classe fréquenté

```
/* niveauEducation==1 ? @optioncode.InRange(1,3) : niveauEducation==2 ? @optioncode.InRange(4,13) : niveauEducation==3 ?  
@optioncode.InRange(14,16) : niveauEducation==4 ? @optioncode.InRange(17,25) : niveauEducation==5 ? @optioncode.InRange(26,30) :  
niveauEducation==6 ? @optioncode.InRange(31,34) : false */ true
```

### [3] causeEmigrationOld: Causes de la émigration

```
(raisonEmigration==3 && @optioncode.InList(1,2,3,4,99)) || (raisonEmigration==4 && @optioncode.InList(4,99)) || (raisonEmigration==6 &&  
@optioncode.InList(1,2,4,99)) || (raisonEmigration==7 && @optioncode.InList(1,2,4,99)) || (raisonEmigration==10 &&  
@optioncode.InList(1,2,4,99)) || raisonEmigration==99
```

### [4] causeEmigration: Quelles sont les raisons de quitter sa maison pour <font color="blue">%raisonEmigration%</font>?

```
(raisonEmigration==1 && @optioncode.InList(15,12,98,99)) || (raisonEmigration==2 && @optioncode.InList(16,12,17,98,99)) ||  
(raisonEmigration==11 && @optioncode.InList(4,12,14,10,16,98,99)) || (raisonEmigration==3 &&  
@optioncode.InList(1,2,3,4,12,13,16,17,12,98,99)) || (raisonEmigration==12 && @optioncode.InList(12,15,17,98,99)) ||  
(raisonEmigration==13 && @optioncode.InList(10,11,12,17,98,99)) || (raisonEmigration==4 && @optioncode.InList(1,3,4,10,11,12,17,18,98,99))  
|| (raisonEmigration==5 && @optioncode.InList(1,3,4,10,11,12,17,18,98,99)) || (raisonEmigration==6 &&  
@optioncode.InList(1,3,4,10,11,12,17,18,98,99)) || (raisonEmigration==7 && @optioncode.InList(1,3,4,10,11,12,17,18,98,99)) ||  
(raisonEmigration==10 && @optioncode.InList(1,3,4,10,11,12,17,18,98,99)) || (raisonEmigration==8 &&  
@optioncode.InList(1,2,3,4,13,16,17,12,98,99)) || (raisonEmigration==9 && @optioncode.InList(12,14,15,16,17,98,99)) ||  
raisonEmigration==99
```

### [5] causeImmigration: Causes de la immigration

```
(raisonMigration==3 && @optioncode.InList(1,2,3,4,99)) || (raisonMigration==4 && @optioncode.InList(4,99)) || (raisonMigration==6 &&  
@optioncode.InList(1,2,4,99)) || (raisonMigration==7 && @optioncode.InList(1,2,4,99)) || (raisonMigration==10 &&  
@optioncode.InList(1,2,4,99)) || raisonMigration==99
```

### [6] causesImmigration: Quelles sont les raisons de quitter sa maison pour <font color="blue">%raisonImmigration%</font>?

```
(raisonImmigration==1 && @optioncode.InList(15,12,98,99)) || (raisonImmigration==2 && @optioncode.InList(16,12,17,98,99)) ||  
(raisonImmigration==11 && @optioncode.InList(4,12,14,10,16,98,99)) || (raisonImmigration==3 &&  
@optioncode.InList(1,2,3,4,12,13,16,17,12,98,99)) || (raisonImmigration==12 && @optioncode.InList(12,15,17,98,99)) ||  
(raisonImmigration==13 && @optioncode.InList(10,11,12,17,98,99)) || (raisonImmigration==4 &&  
@optioncode.InList(1,3,4,10,11,12,17,18,98,99)) || (raisonImmigration==5 && @optioncode.InList(1,3,4,10,11,12,17,18,98,99)) ||  
(raisonImmigration==6 && @optioncode.InList(1,3,4,10,11,12,17,18,98,99)) || (raisonImmigration==7 &&  
@optioncode.InList(1,3,4,10,11,12,17,18,98,99)) || (raisonImmigration==10 && @optioncode.InList(1,3,4,10,11,12,17,18,98,99)) ||  
(raisonImmigration==8 && @optioncode.InList(1,2,3,4,13,16,17,12,98,99)) || (raisonImmigration==9 &&  
@optioncode.InList(12,14,15,16,17,98,99)) || raisonImmigration==99
```

Legend and structure of information in this file

| Name of section                                                                                                                                                                                                                                                                                                        |                                 | Type of question, scope                                                                                                                                                                                                                                              |  | Variable name        |
|------------------------------------------------------------------------------------------------------------------------------------------------------------------------------------------------------------------------------------------------------------------------------------------------------------------------|---------------------------------|----------------------------------------------------------------------------------------------------------------------------------------------------------------------------------------------------------------------------------------------------------------------|--|----------------------|
| Enabling condition for this section                                                                                                                                                                                                                                                                                    | Question title                  | Answer options                                                                                                                                                                                                                                                       |  |                      |
| E s4_other_sources_which.Contains(98)                                                                                                                                                                                                                                                                                  | SECTION 5: OTHER INCOME SOURCES |                                                                                                                                                                                                                                                                      |  |                      |
| Duis aute irure dolor in reprehenderit in voluptate velit esse cillum dolore eu fugiat nulla pariatur?                                                                                                                                                                                                                 |                                 | MULTI-SELECT<br>SCOPE: PREFILLED                                                                                                                                                                                                                                     |  | s4_rel_leaders_other |
| I This refers to family relations<br>E s3_time_other > 0<br>V1 s4_rel_leaders_which.Contains(98)<br>M1 Can not be itself<br>V2 (s3_time_other_breeding_advice <= (50 - s3_time_art_insem_advice))    s3_time_other_breeding_advice == 0<br>M2 This person is not in the list<br>F optioncode != s5_ignored_option_code |                                 | 01 <input type="checkbox"/> Community animal health workers<br>02 <input type="checkbox"/> Private<br>03 <input type="checkbox"/> Government<br>04 <input type="checkbox"/> Livestock keepers association<br>05 <input type="checkbox"/> NGO<br><br>And 5 other [13] |  |                      |
| Additional information:<br>"I" – Question instruction<br>"E" – Enabling condition<br>"V1" – Validation condition №1<br>"M1" – Message for validation №1<br>"F" – Filter in Categorical questions                                                                                                                       |                                 | Link to full set in appendix                                                                                                                                                                                                                                         |  |                      |

| Breadcrumbs                                                                     |                         |
|---------------------------------------------------------------------------------|-------------------------|
| Type or roster                                                                  | Roster Title            |
| CHAPTER 3 IDENTIFICATION /<br>Roster:<br>generated by fixed list:               | LEADER RELATION DETAILS |
| 01 Ward Livestock Officer<br>02 Village Livestock Officer<br>99 Other (specify) |                         |
| List items                                                                      |                         |
